# Supplementary material for: 2020 forest age map for China with 30 m resolution
Source: Copernicus journal article supplement (doi:10.5194/essd-2023-385), 2023-10-10
Supplement: Supplementary file [file essd-2023-385-AC1-supplement.pdf]

## Supplementary

**Supplementary Table 1** Principal component analysis of 19 bioclimatic variables

| Variables | Describe                                                   | Principal Component |               |               |
|-----------|------------------------------------------------------------|---------------------|---------------|---------------|
|           |                                                            | PC1                 | PC2           | PC3           |
| BIO1      | Annual Mean Temperature                                    | <b>0.272</b>        | 0.112         | 0.224         |
| BIO2      | Mean Diurnal Range (Mean of monthly (max temp - min temp)) | <b>-0.205</b>       | 0.177         | -0.145        |
| BIO3      | Isothermality (BIO2/BIO7) (×100)                           | -0.129              | <b>0.403</b>  | -0.123        |
| BIO4      | Temperature Seasonality (standard deviation ×100)          | 0.039               | <b>-0.476</b> | 0.128         |
| BIO5      | Max Temperature of Warmest Month                           | <b>0.266</b>        | -0.093        | 0.261         |
| BIO6      | Min Temperature of Coldest Month                           | <b>0.262</b>        | 0.181         | 0.200         |
| BIO7      | Temperature Annual Range (BIO5-BIO6)                       | -0.059              | <b>-0.447</b> | 0.041         |
| BIO8      | Mean Temperature of Wettest Quarter                        | 0.221               | 0.029         | <b>0.447</b>  |
| BIO9      | Mean Temperature of Driest Quarter                         | <b>0.253</b>        | 0.220         | 0.097         |
| BIO10     | Mean Temperature of Warmest Quarter                        | <b>0.272</b>        | -0.069        | 0.264         |
| BIO11     | Mean Temperature of Coldest Quarter                        | 0.243               | <b>0.253</b>  | 0.168         |
| BIO12     | Annual Precipitation                                       | <b>0.272</b>        | -0.013        | -0.271        |
| BIO13     | Precipitation of Wettest Month                             | 0.256               | 0.077         | <b>-0.266</b> |
| BIO14     | Precipitation of Driest Month                              | 0.255               | -0.147        | <b>-0.257</b> |
| BIO15     | Precipitation Seasonality (Coefficient of Variation)       | -0.198              | <b>0.286</b>  | 0.066         |
| BIO16     | Precipitation of Wettest Quarter                           | 0.255               | 0.110         | <b>-0.269</b> |
| BIO17     | Precipitation of Driest Quarter                            | 0.248               | -0.165        | <b>-0.275</b> |
| BIO18     | Precipitation of Warmest Quarter                           | <b>0.211</b>        | 0.210         | -0.162        |
| BIO19     | Precipitation of Coldest Quarter                           | 0.250               | -0.124        | <b>-0.303</b> |

PC1 is related to BIO1, BIO2, BIO5, BIO6, BIO9, BIO10, BIO12 and BIO18

PC2 is related to BIO3, BIO4, BIO7, BIO11 and BIO15

PC3 is related to BIO8, BIO13, BIO14, BIO16, BIO17 and BIO19.

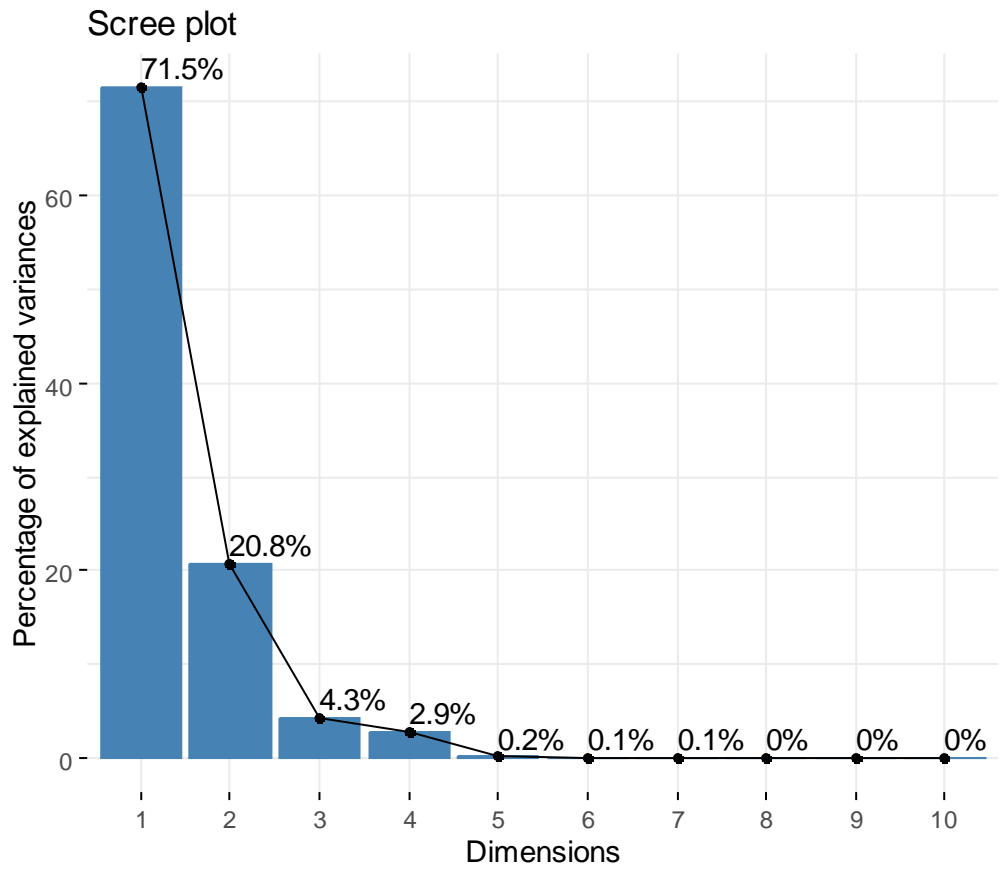

**Supplementary Figure1.** Scree plot of 19 bioclimatic variables

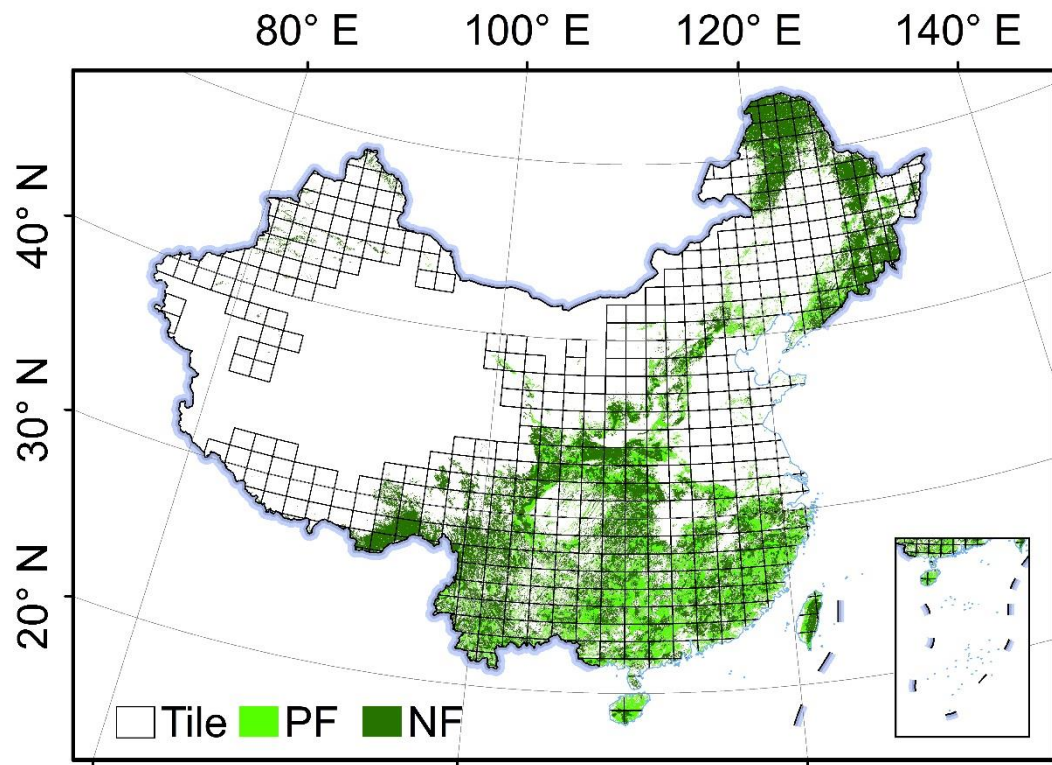

**Supplementary Figure 2.**  $1^{\circ} \times 1^{\circ}$  grids for China's forest region. PF: planted forest, NF: Natural forest.

**Supplementary Table 2. The thirteen alternative machine learning algorithms and their accuracies( $R^2$ )**

| Model                    | Validation |         |         |          |         |         |         |         | Test    |         |         |          |         |         |         |         |
|--------------------------|------------|---------|---------|----------|---------|---------|---------|---------|---------|---------|---------|----------|---------|---------|---------|---------|
|                          | CT         | WT      | QT      | TM       | TS      | TD      | TN      | SE      | CT      | WT      | QT      | TM       | TS      | TD      | TN      | SE      |
| DecisionTree             | -0.1443    | 0.2008  | 0.2540  | 0.6540   | 0.5230  | 0.4843  | 0.2743  | 0.3521  | -0.0116 | 0.2232  | 0.0815  | 0.7207   | 0.5480  | 0.5409  | 0.2882  | 0.3586  |
| ExtraTree                | -0.1450    | 0.1879  | 0.1295  | 0.6354   | 0.4200  | 0.4582  | 0.2306  | 0.3115  | -0.2244 | 0.2527  | 0.1297  | 0.6657   | 0.4828  | 0.5660  | 0.2398  | 0.3526  |
| GaussianProcess          | -2.9984    | -1.5756 | -2.2477 | -13.0362 | -1.2202 | -2.3692 | -2.7937 | -1.2905 | -2.8423 | -1.5995 | -2.5428 | -11.2968 | -1.1853 | -2.1186 | -2.8901 | -1.2705 |
| XGB                      | 0.3311     | 0.5718  | 0.5109  | 0.7942   | 0.7106  | 0.7077  | 0.5845  | 0.6573  | 0.3402  | 0.5857  | 0.3609  | 0.8241   | 0.7272  | 0.7586  | 0.6031  | 0.6690  |
| <b>RandomForest</b>      | 0.4124     | 0.6017  | 0.5546  | 0.8113   | 0.7343  | 0.7067  | 0.6236  | 0.6609  | 0.4262  | 0.6121  | 0.5363  | 0.8414   | 0.7641  | 0.7724  | 0.6272  | 0.6749  |
| Bagging                  | 0.3646     | 0.5661  | 0.5268  | 0.7961   | 0.7043  | 0.6699  | 0.5859  | 0.6309  | 0.3674  | 0.5791  | 0.4387  | 0.8287   | 0.7315  | 0.7487  | 0.6055  | 0.6457  |
| <b>HistGradientBoost</b> | 0.3935     | 0.6039  | 0.5093  | 0.8051   | 0.7325  | 0.6931  | 0.6234  | 0.6685  | 0.4092  | 0.6113  | 0.4526  | 0.8341   | 0.7572  | 0.7825  | 0.6303  | 0.6885  |
| <b>LGBM</b>              | 0.3986     | 0.6052  | 0.5202  | 0.8083   | 0.7234  | 0.6962  | 0.6262  | 0.6726  | 0.4203  | 0.6112  | 0.4552  | 0.8362   | 0.7513  | 0.7845  | 0.6341  | 0.6891  |
| <b>GradientBoosting</b>  | 0.4208     | 0.5950  | 0.5484  | 0.8095   | 0.7260  | 0.7007  | 0.6223  | 0.6605  | 0.4543  | 0.5923  | 0.4930  | 0.8433   | 0.7435  | 0.7705  | 0.6228  | 0.6796  |
| MLP                      | 0.3990     | 0.5198  | 0.1415  | 0.5954   | 0.7076  | 0.6016  | 0.5953  | 0.6659  | 0.4311  | 0.5120  | 0.2354  | 0.7695   | 0.7170  | 0.6685  | 0.5900  | 0.6685  |
| AdaBoost                 | 0.1650     | 0.4622  | 0.4775  | 0.6436   | 0.5348  | 0.5867  | 0.5443  | 0.3152  | 0.1700  | 0.4808  | 0.4589  | 0.7705   | 0.6095  | 0.5980  | 0.5434  | 0.3559  |
| KNeighbors               | -0.0304    | 0.3386  | 0.3247  | 0.5851   | 0.4612  | 0.5574  | 0.0958  | 0.3883  | 0.0013  | 0.3779  | 0.1892  | 0.6067   | 0.5253  | 0.6302  | 0.1312  | 0.4284  |
| <b>CatBoost</b>          | 0.4263     | 0.6109  | 0.5814  | 0.8162   | 0.7409  | 0.7322  | 0.6271  | 0.6749  | 0.4501  | 0.6203  | 0.5022  | 0.8444   | 0.7602  | 0.7922  | 0.6275  | 0.6924  |

**Supplementary Table 3.** The hyperparameters and their range for different models.

| Algorithm         | Python Package                                 | Hyperparameter Range                                                                                                                                                                                                                                                                                                                                                                         |
|-------------------|------------------------------------------------|----------------------------------------------------------------------------------------------------------------------------------------------------------------------------------------------------------------------------------------------------------------------------------------------------------------------------------------------------------------------------------------------|
| RF                | sklearn.ensemble.RandomForestRegressor         | max_depth:[3,18]<br>n_estimators:[ 5000, 8000]<br>max_features:['auto', 'sqrt', 'log2']<br>min_samples_split:[ 2, 10]<br>min_samples_leaf:[ 2, 10]<br>random_state: 2023                                                                                                                                                                                                                     |
| GBDT              | sklearn.ensemble.GradientBoostingRegressor     | max_depth:[ 2, 10]<br><br>learning_rate:<br>[0.001,0.005,0.01,0.05,0.1]<br>n_estimators:[4000, 5000]<br>subsample:[ 0.7, 0.9]<br>max_features: ['auto', 'sqrt', 'log2']<br>min_samples_split:[ 2, 10]<br>random_state:2023                                                                                                                                                                   |
| HistGradientBoost | sklearn.ensemble.HistGradientBoostingRegressor | max_depth:[ 2, 10]<br><br>learning_rate:<br>[0.001,0.02,0.03,0.005,0.01,0.05,0.1]<br>max_leaf_nodes:[30, 40]<br>min_samples_leaf:[15, 25]<br>random_state:2023                                                                                                                                                                                                                               |
| LightGBM          | lightgbm                                       | reg_alpha: [0.001, 10.0]<br>reg_lambda: [0.001, 10.0]<br>num_leaves: [11, 333]<br>min_child_samples: [5, 100]<br>max_depth: [3, 20]<br>learning_rate:<br>[0.001,0.005,0.01,0.05,0.1]<br>colsample_bytree: [0.1, 0.5]<br>n_estimators: [7000, 8000]<br>cat_smooth: [10, 100]<br>cat_l2: [1, 20]<br>min_data_per_group: [50, 200]<br>cat_feature: [10, 60]<br>n_jobs: -1<br>random_state: 2023 |
| CatBoost          | catboost                                       | depth: [3, 10]<br>learning_rate:<br>[0.001,0.005,0.01,0.05,0.1]<br>iterations: [5000, 9000]<br>max_bin: [200, 400]<br>min_data_in_leaf: [1, 30]<br>l2_leaf_reg: [0.0001, 1.0, log=True]<br>subsample: [0.6, 0.9]<br>random_state: 2023                                                                                                                                                       |

**Supplementary Table 4.** The optimal hyperparameter parameter values for different MLAs.

| Vegetation division | Algorithm         | Hyperparameter values                                                                                                                                                                                                                                                                                                    |
|---------------------|-------------------|--------------------------------------------------------------------------------------------------------------------------------------------------------------------------------------------------------------------------------------------------------------------------------------------------------------------------|
| CT                  | RF                | (max_depth=8,n_estimators=6589,max_features='auto',min_samples_leaf=9,min_samples_split=8,random_state=2023)                                                                                                                                                                                                             |
|                     | GBDT              | {'max_depth': 4, 'learning_rate': 0.001, 'n_estimators': 4909, 'subsample': 0.7234085712326702, 'max_features': 'auto', 'min_samples_split':10,'random_state': 2023}                                                                                                                                                     |
|                     | CatBoost          | (depth=10,learning_rate=0.1,iterations=86,max_bin=320,min_data_in_leaf=27,l2_leaf_reg=0.17934206956587195,subsample=0.6773452775007673,random_seed=2023)                                                                                                                                                                 |
| WT                  | RF                | (max_depth=19,n_estimators=348,max_features='sqrt',min_samples_leaf=1,min_samples_split=3,random_state=2023)                                                                                                                                                                                                             |
|                     | LGBM              | {'reg_alpha': 4.188760632650688, 'reg_lambda': 4.255499587500175, 'num_leaves': 75, 'min_child_samples': 7, 'max_depth': 19, 'learning_rate': 0.001, 'colsample_bytree': 0.4928730464443524, 'n_estimators': 7117, 'cat_smooth': 84, 'cat_l2': 15, 'min_data_per_group': 193, 'cat_feature': 28, 'random_state': 2023}   |
|                     | CatBoost          | (depth=12,learning_rate=0.05,iterations=133,max_bin=314,min_data_in_leaf=8,l2_leaf_reg=0.0021616691540516635,subsample=0.827218563526197,random_seed=2023)                                                                                                                                                               |
| QT                  | RF                | (max_depth=9,n_estimators=100,max_features='auto',min_samples_leaf=1,min_samples_split=2,random_state=2023)                                                                                                                                                                                                              |
|                     | GBDT              | {'max_depth': 5, 'learning_rate': 0.001, 'n_estimators': 4873, 'subsample': 0.6338013854778914, 'max_features': 'sqrt', 'min_samples_split':8,'random_state': 2023}                                                                                                                                                      |
|                     | CatBoost          | (depth=7,learning_rate=0.1,iterations=90,max_bin=337,min_data_in_leaf=4,l2_leaf_reg=0.0008155227484111563,subsample=0.7808941610379249,random_seed=2023)                                                                                                                                                                 |
| TM                  | HistGradientBoost | (learning_rate=0.05, max_leaf_nodes=33, max_depth=5, min_samples_leaf=21, l2_regularization=0.0001, max_bins=200, early_stopping='auto', random_state=2023)                                                                                                                                                              |
|                     | GBDT              | {'max_depth': 5, 'learning_rate': 0.001, 'n_estimators': 4970, 'subsample': 0.7323582473497865, 'max_features': 'auto', 'min_samples_split':9,'random_state': 2023}                                                                                                                                                      |
|                     | CatBoost          | (depth=5,learning_rate=0.1,iterations=228,max_bin=298,min_data_in_leaf=14,l2_leaf_reg=0.912715671115768,subsample=0.7691332886798857,random_seed=2023)                                                                                                                                                                   |
| TS                  | RF                | (max_depth=12,n_estimators=105,max_features='auto',min_samples_leaf=2,min_samples_split=8,random_state=2023)                                                                                                                                                                                                             |
|                     | LightGBM          | {'reg_alpha': 3.0022329902119083, 'reg_lambda': 6.129604703602383, 'num_leaves': 69, 'min_child_samples': 38, 'max_depth': 15, 'learning_rate': 0.001, 'colsample_bytree': 0.48372749547013316, 'n_estimators': 7571, 'cat_smooth': 82, 'cat_l2': 5, 'min_data_per_group': 128, 'cat_feature': 41, 'random_state': 2023} |
|                     | CatBoost          | (depth=7,learning_rate=0.005,iterations=4164,max_bin=215,min_data_in_leaf=24,l2_leaf_reg=0.00017571003237103587,subsample=0.8817081947911567,random_seed=2023)                                                                                                                                                           |
| TD                  | HistGradientBoost | (learning_rate=0.1, max_leaf_nodes=39, max_depth=4, min_samples_leaf=22, l2_regularization=0.0001, max_bins=200,                                                                                                                                                                                                         |

|    |                   |                                                                                                                                                                                                                                                                                                                          |
|----|-------------------|--------------------------------------------------------------------------------------------------------------------------------------------------------------------------------------------------------------------------------------------------------------------------------------------------------------------------|
|    |                   | early_stopping='auto', random_state=2023)                                                                                                                                                                                                                                                                                |
|    | LightGBM          | {'reg_alpha': 2.1333544399270994, 'reg_lambda': 7.980678166407649, 'num_leaves': 217, 'min_child_samples': 5, 'max_depth': 5, 'learning_rate': 0.003, 'colsample_bytree': 0.43984300935044063, 'n_estimators': 7992, 'cat_smooth': 76, 'cat_l2': 7, 'min_data_per_group': 187, 'cat_feature': 47, 'random_state': 2023}  |
|    | CatBoostRegressor | (depth=5, learning_rate=0.01, iterations=5203, max_bin=246, min_data_in_leaf=6, l2_leaf_reg=0.00045191356462636874, subsample=0.6391293474573634, random_seed=2023)                                                                                                                                                      |
| TN | HistGradientBoost | (learning_rate=0.05, max_leaf_nodes=38, max_depth=6, min_samples_leaf=20, l2_regularization=0.0001, max_bins=200, early_stopping='auto', random_state=2023)                                                                                                                                                              |
|    | LightGBM          | {'reg_alpha': 3.0022329902119083, 'reg_lambda': 6.129604703602383, 'num_leaves': 69, 'min_child_samples': 38, 'max_depth': 15, 'learning_rate': 0.001, 'colsample_bytree': 0.48372749547013316, 'n_estimators': 7571, 'cat_smooth': 82, 'cat_l2': 5, 'min_data_per_group': 128, 'cat_feature': 41, 'random_state': 2023} |
|    | CatBoost          | (depth=10, learning_rate=0.1, iterations=155, max_bin=319, min_data_in_leaf=1, l2_leaf_reg=0.33907394509650335, subsample=0.7682844712570389, random_seed=2023)                                                                                                                                                          |
| SE | LightGBM          | {'reg_alpha': 6.116715128459515, 'reg_lambda': 5.231647634428009, 'num_leaves': 18, 'min_child_samples': 73, 'max_depth': 8, 'learning_rate': 0.002, 'colsample_bytree': 0.4726653436124117, 'n_estimators': 7288, 'cat_smooth': 67, 'cat_l2': 6, 'min_data_per_group': 79, 'cat_feature': 36, 'random_state': 2023}     |
|    | MLP               | {'hidden_layer_sizes': (200, 200, 200), 'activation': 'relu', 'solver': 'adam', 'alpha': 0.0001, 'batch_size': 'auto', 'learning_rate': 'constant', 'learning_rate_init': 0.001, 'max_iter': 155, 'random_state': 2023}                                                                                                  |
|    | CatBoost          | (depth=7, learning_rate=0.005, iterations=6248, max_bin=383, min_data_in_leaf=20, l2_leaf_reg=0.6887500276693759, subsample=0.7127716543175433, random_seed=2023)                                                                                                                                                        |

---

**Supplementary Table 5.** The training results of different MLAs

| Vegetation division | Algorithm         | Train  |        | Validation |         |
|---------------------|-------------------|--------|--------|------------|---------|
|                     |                   | R2     | RMSE   | R2         | RMSE    |
| CT                  | RF                | 0.6102 | 4.6402 | 0.4394     | 25.6178 |
|                     | GBDT              | 0.6463 | 4.5287 | 0.4398     | 25.6177 |
|                     | CatBoost          | 0.7573 | 4.1219 | 0.4307     | 25.8266 |
| WT                  | RF                | 0.9286 | 2.2631 | 0.6108     | 11.9231 |
|                     | LGBM              | 0.8303 | 2.8096 | 0.6112     | 11.9211 |
|                     | CatBoost          | 0.8309 | 2.8073 | 0.6085     | 11.9593 |
| QT                  | RF                | 0.9326 | 4.7895 | 0.5135     | 56.7438 |
|                     | GBDT              | 0.8846 | 5.4791 | 0.5430     | 55.6378 |
|                     | CatBoost          | 0.9637 | 4.1029 | 0.5648     | 54.1309 |
| TM                  | HistGradientBoost | 0.8729 | 1.9054 | 0.8129     | 4.3884  |
|                     | GBDT              | 0.9059 | 1.7673 | 0.8139     | 4.3779  |
|                     | CatBoost          | 0.8969 | 1.8083 | 0.8202     | 4.3006  |
| TS                  | RF                | 0.9068 | 3.2872 | 0.7365     | 18.0381 |
|                     | LightGBM          | 0.8685 | 3.5823 | 0.7456     | 17.7228 |
|                     | CatBoost          | 0.9375 | 2.9747 | 0.7493     | 17.5945 |
| TD                  | HistGradientBoost | 0.8555 | 4.8085 | 0.7125     | 32.2791 |
|                     | LightGBM          | 0.9485 | 3.7154 | 0.7065     | 32.6168 |
|                     | CatBoostRegressor | 0.9834 | 2.8009 | 0.7235     | 31.5870 |
| TN                  | HistGradientBoost | 0.6581 | 4.0517 | 0.6246     | 17.1609 |
|                     | LightGBM          | 0.8080 | 3.5072 | 0.6292     | 17.0570 |
|                     | CatBoost          | 0.7633 | 3.6956 | 0.6198     | 17.2713 |
| SE                  | LightGBM          | 0.7273 | 3.3467 | 0.6722     | 12.2440 |
|                     | MLP               | 0.7013 | 3.4237 | 0.6571     | 12.5179 |
|                     | CatBoost          | 0.7899 | 3.1354 | 0.6774     | 12.1481 |

**Supplementary Table 6.** Mean and standard deviation of forest age in provinces

| Province       | Mean     | S.D.     |
|----------------|----------|----------|
| Anhui          | 30.0438  | 13.18046 |
| Beijing        | 23.72932 | 6.941676 |
| Chongqing      | 44.21707 | 14.81873 |
| Fujian         | 34.71088 | 14.08378 |
| Gansu          | 62.91986 | 28.90555 |
| Guangdong      | 32.2954  | 14.03617 |
| Guangxi        | 35.98391 | 14.40237 |
| Guizhou        | 38.97128 | 14.09774 |
| Hainan         | 31.67802 | 14.70032 |
| Hebei          | 20.04016 | 9.452565 |
| Heilongjiang   | 76.63183 | 26.88827 |
| Henan          | 26.42557 | 13.65384 |
| Hong Kong      | 2.905065 | 3.205983 |
| Hubei          | 44.2699  | 17.3144  |
| Hunan          | 30.98115 | 11.84794 |
| Inner Mongolia | 95.71522 | 35.21181 |



|          |          |          |
|----------|----------|----------|
| Jiangsu  | 22.35844 | 11.39468 |
| Jiangxi  | 34.05567 | 13.07562 |
| Jilin    | 75.20958 | 26.22582 |
| Liaoning | 29.84999 | 21.79875 |
| Macao    | 3.805029 | 2.552609 |
| Ningxia  | 44.01774 | 22.64126 |
| Qinghai  | 115.7855 | 47.51708 |
| Shaanxi  | 52.42966 | 20.90854 |
| Shandong | 15.81338 | 6.811547 |
| Shanghai | 5.695209 | 3.581797 |
| Shanxi   | 30.59349 | 11.17819 |
| Sichuan  | 75.09604 | 32.48283 |
| Taiwan   | 53.18191 | 20.35996 |
| Tianjin  | 15.6741  | 6.724648 |
| Tibet    | 83.86414 | 30.52417 |
| Xinjiang | 103.28   | 50.83277 |
| Yunnan   | 54.69701 | 21.25958 |
| Zhejiang | 35.3726  | 13.07106 |

**Supplementary Table 7.** Mean and standard deviation of forest age in eight vegetation zones

| Vegetation zone | Mean     | S.D.     |
|-----------------|----------|----------|
| CT              | 106.6109 | 24.25592 |
| WT              | 27.47919 | 13.87375 |
| QT              | 136.9514 | 36.23872 |
| TM              | 52.04598 | 26.27037 |
| TS              | 106.0278 | 56.54841 |
| TD              | 59.32036 | 33.32852 |
| TN              | 67.25398 | 22.54142 |
| SE              | 48.23603 | 26.65255 |

**Supplementary Table 8.** Field measurements of forest age collected from published papers

| ID | Longitude | Latitude | Year      | Mean age (2020) | Reference           |
|----|-----------|----------|-----------|-----------------|---------------------|
| 1  | 23.2450   | 113.4210 | 2020      | 6               | Chen et al., (2022) |
| 2  | 23.2260   | 113.3930 | 2020      | 10              | Chen et al., (2022) |
| 3  | 23.2560   | 113.4190 | 2020      | 15              | Chen et al., (2022) |
| 4  | 23.2120   | 113.3940 | 2020      | 20              | Chen et al., (2022) |
| 5  | 23.2550   | 113.3810 | 2020      | 30              | Chen et al., (2022) |
| 6  | 24.5200   | 114.4300 | 2010-2011 | 40              | Di Y et al. (2012)  |
| 7  | 26.8814   | 117.9353 | 2017      | 10              | Feng et al., (2021) |
| 8  | 30.0800   | 110.5600 | 2010      | 40              | Hu et al., (2012)   |
| 9  | 31.4300   | 110.3500 | 2010      | 45              | Hu et al., (2012)   |
| 10 | 23.4800   | 100.5300 | 2013      | 67              | Li et al. (2015)    |
| 11 | 23.0502   | 109.3289 | 2021      | 3               | Li et al., (2021)   |
| 12 | 23.0535   | 109.3329 | 2021      | 8               | Li et al., (2021)   |
| 13 | 23.1118   | 109.2420 | 2021      | 18              | Li et al., (2021)   |

|    |         |          |           |     |                     |
|----|---------|----------|-----------|-----|---------------------|
| 14 | 23.0533 | 109.1602 | 2021      | 21  | Li et al., (2021)   |
| 15 | 25.3300 | 114.5700 | 2012      | 53  | Qiu et al., (2020)  |
| 16 | 25.3300 | 114.5700 | 2012      | 53  | Qiu et al., (2020)  |
| 17 | 25.3300 | 114.5700 | 2012      | 36  | Qiu et al., (2020)  |
| 18 | 22.0483 | 110.4658 | 2020      | 5   | Song et al., (2021) |
| 19 | 21.9192 | 110.5008 | 2020      | 15  | Song et al., (2021) |
| 20 | 22.0222 | 110.5003 | 2020      | 5   | Song et al., (2021) |
| 21 | 36.4200 | 109.5300 | 2013      | 79  | Sun et al., (2020)  |
| 22 | 23.7700 | 101.2700 | 2013      | 22  | Tong et al. (2013)  |
| 23 | 23.7700 | 101.2700 | 2013      | 37  | Tong et al. (2013)  |
| 24 | 23.9000 | 101.2700 | 2013      | 52  | Tong et al. (2013)  |
| 25 | 28.6017 | 104.5672 | 2011      | 26  | Wu et al. (2023)    |
| 26 | 28.6093 | 104.5769 | 2015      | 13  | Wu et al. (2023)    |
| 27 | 22.0263 | 106.9073 | 2013      | 30  | Wu et al. (2023)    |
| 28 | 22.0243 | 106.9102 | 2013      | 30  | Wu et al. (2023)    |
| 29 | 22.0264 | 106.9132 | 2013      | 30  | Wu et al. (2023)    |
| 30 | 22.8667 | 108.1667 | 2012      | 25  | Wu et al. (2023)    |
| 31 | 21.9667 | 109.2833 | 2012      | 30  | Wu et al. (2023)    |
| 32 | 26.6993 | 109.6076 | 2010      | 23  | Wu et al. (2023)    |
| 33 | 26.7003 | 109.6077 | 2010      | 23  | Wu et al. (2023)    |
| 34 | 24.7633 | 109.8933 | 2012      | 21  | Wu et al. (2023)    |
| 35 | 34.0909 | 110.4029 | 2012      | 25  | Wu et al. (2023)    |
| 36 | 30.9189 | 110.6969 | 2015      | 30  | Wu et al. (2023)    |
| 37 | 27.2938 | 112.8481 | 2013      | 18  | Wu et al. (2023)    |
| 38 | 27.2943 | 112.8486 | 2013      | 17  | Wu et al. (2023)    |
| 39 | 27.3545 | 113.3865 | 2013      | 21  | Wu et al. (2023)    |
| 40 | 26.8139 | 117.5247 | 2014      | 27  | Wu et al. (2023)    |
| 41 | 26.8072 | 117.5408 | 2014      | 20  | Wu et al. (2023)    |
| 42 | 52.9783 | 122.5456 | 2010      | 36  | Wu et al. (2023)    |
| 43 | 25.9500 | 108.3700 | 2017      | 36  | Zhou et al., 2018   |
| 44 | 18.7400 | 108.8500 | 2011-2016 | 59  | Zhu et al. (2017)   |
| 45 | 24.4500 | 113.6800 | 2011-2016 | 52  | Zhu et al. (2017)   |
| 46 | 24.8900 | 113.0300 | 2011-2016 | 49  | Zhu et al. (2017)   |
| 47 | 24.9600 | 112.9600 | 2011-2016 | 98  | Zhu et al. (2017)   |
| 48 | 25.3200 | 114.1500 | 2011-2016 | 71  | Zhu et al. (2017)   |
| 49 | 25.7100 | 100.0400 | 2011-2016 | 56  | Zhu et al. (2017)   |
| 50 | 25.7200 | 100.0500 | 2011-2016 | 85  | Zhu et al. (2017)   |
| 51 | 25.7200 | 100.0500 | 2011-2016 | 108 | Zhu et al. (2017)   |
| 52 | 25.8300 | 111.6500 | 2011-2016 | 31  | Zhu et al. (2017)   |
| 53 | 25.8000 | 112.8700 | 2011-2016 | 26  | Zhu et al. (2017)   |
| 54 | 25.6800 | 118.1900 | 2011-2016 | 40  | Zhu et al. (2017)   |
| 55 | 26.1700 | 106.6500 | 2011-2016 | 45  | Zhu et al. (2017)   |
| 56 | 26.5800 | 116.3400 | 2011-2016 | 61  | Zhu et al. (2017)   |
| 57 | 27.0200 | 111.3400 | 2011-2016 | 40  | Zhu et al. (2017)   |
| 58 | 27.0100 | 117.0700 | 2011-2016 | 64  | Zhu et al. (2017)   |
| 59 | 27.8400 | 98.6800  | 2011-2016 | 41  | Zhu et al. (2017)   |
| 60 | 27.9000 | 117.3600 | 2011-2016 | 84  | Zhu et al. (2017)   |
| 61 | 27.9200 | 117.3500 | 2011-2016 | 93  | Zhu et al. (2017)   |
| 62 | 27.7300 | 117.6300 | 2011-2016 | 74  | Zhu et al. (2017)   |

|    |         |          |           |     |                   |
|----|---------|----------|-----------|-----|-------------------|
| 63 | 27.6000 | 117.4600 | 2011-2016 | 54  | Zhu et al. (2017) |
| 64 | 28.2900 | 99.1600  | 2011-2016 | 114 | Zhu et al. (2017) |
| 65 | 28.1100 | 117.0000 | 2011-2016 | 63  | Zhu et al. (2017) |
| 66 | 29.1000 | 115.5700 | 2011-2016 | 56  | Zhu et al. (2017) |
| 67 | 28.9300 | 118.0600 | 2011-2016 | 88  | Zhu et al. (2017) |
| 68 | 29.2400 | 118.1000 | 2011-2016 | 78  | Zhu et al. (2017) |
| 69 | 29.2200 | 119.5200 | 2011-2016 | 60  | Zhu et al. (2017) |
| 70 | 30.0300 | 102.8300 | 2011-2016 | 54  | Zhu et al. (2017) |
| 71 | 29.7700 | 110.0900 | 2011-2016 | 94  | Zhu et al. (2017) |
| 72 | 31.1700 | 102.9900 | 2011-2016 | 69  | Zhu et al. (2017) |
| 73 | 31.3500 | 102.8300 | 2011-2016 | 69  | Zhu et al. (2017) |
| 74 | 31.5100 | 110.4300 | 2011-2016 | 94  | Zhu et al. (2017) |
| 75 | 32.2200 | 102.6100 | 2011-2016 | 78  | Zhu et al. (2017) |
| 76 | 34.0500 | 107.7000 | 2011-2016 | 84  | Zhu et al. (2017) |
| 77 | 34.0700 | 107.6900 | 2011-2016 | 64  | Zhu et al. (2017) |
| 78 | 33.9300 | 112.1600 | 2011-2016 | 38  | Zhu et al. (2017) |
| 79 | 34.4800 | 110.5700 | 2011-2016 | 32  | Zhu et al. (2017) |
| 80 | 36.3100 | 118.0500 | 2011-2016 | 47  | Zhu et al. (2017) |
| 81 | 37.2600 | 122.4600 | 2011-2016 | 48  | Zhu et al. (2017) |
| 82 | 37.8600 | 111.4600 | 2011-2016 | 52  | Zhu et al. (2017) |
| 83 | 39.9900 | 115.0200 | 2011-2016 | 72  | Zhu et al. (2017) |
| 84 | 39.9500 | 115.4300 | 2011-2016 | 79  | Zhu et al. (2017) |
| 85 | 39.9600 | 115.4300 | 2011-2016 | 79  | Zhu et al. (2017) |
| 86 | 40.5700 | 115.7700 | 2011-2016 | 41  | Zhu et al. (2017) |
| 87 | 40.3900 | 117.4600 | 2011-2016 | 30  | Zhu et al. (2017) |
| 88 | 40.3100 | 117.5700 | 2011-2016 | 45  | Zhu et al. (2017) |
| 89 | 41.2700 | 125.4100 | 2011-2016 | 52  | Zhu et al. (2017) |
| 90 | 42.2000 | 127.5100 | 2011-2016 | 67  | Zhu et al. (2017) |
| 91 | 42.8100 | 127.9100 | 2011-2016 | 99  | Zhu et al. (2017) |
| 92 | 44.4900 | 81.2600  | 2011-2016 | 153 | Zhu et al. (2017) |
| 93 | 44.7800 | 129.2400 | 2011-2016 | 72  | Zhu et al. (2017) |
| 94 | 45.3800 | 127.6000 | 2011-2016 | 63  | Zhu et al. (2017) |
| 95 | 46.4700 | 131.1100 | 2011-2016 | 89  | Zhu et al. (2017) |
| 96 | 47.6700 | 128.0700 | 2011-2016 | 57  | Zhu et al. (2017) |
| 97 | 47.9900 | 88.2600  | 2011-2016 | 46  | Zhu et al. (2017) |
| 98 | 51.7800 | 123.0200 | 2011-2016 | 109 | Zhu et al. (2017) |
| 99 | 52.8200 | 123.2400 | 2011-2016 | 100 | Zhu et al. (2017) |

---
