# Supplementary material for: 2020 forest age map for China with 30 m resolution
Source: Copernicus journal article supplement (doi:10.5194/essd-2023-385), 2023-10-10
Supplement: Supplementary file [file essd-2023-385-CC2-supplement.pdf]

---

## 2020 forest age map for China with 30 m resolution

Anonymous Referee #2

Thank you for your constructive comments and suggestions on our manuscript entitled “2020 forest age map for China with 30 m resolution” (Manuscript Number: essd-2023-385). We appreciate the time and effort you have invested in reviewing our work. We agree with your assessment of deficiencies in the introduction, method, and discussion sections, and we have addressed these issues comprehensively in the revised version. In the revised manuscript, we have offered a more detailed explanation of the algorithm and its combination with machine learning, addressing any specific concerns you have raised. Also, we have carried out a comprehensive check on the structure and language of the full text. All changes were marked in highlight text in the revised manuscript. Please find our responses to your comments below:

**Reply:**

**1. The introduction should highlight the innovation, why is it LandTendr algorithm instead of CCDC and other algorithms?**

**Reply:** Thanks to the reviewer for pointing this out, we strengthened the innovation of this study in the introduction and added a review of the LandTendr algorithm in predicting the age of forests in the introduction. Please see below or check in Line 70-79.

Disturbance detection approaches, capable of identifying the time of the most recent stand-replacing disturbance, have proven accurate in forest age estimation (Li et al. 2024), which mainly include Landsat-based Detection of Trends in Disturbance and Recovery (LandTendr) (Kennedy et al. 2010), Continuous Change Detection and Classification (CCDC) (Zhu and Woodcock 2014), the Vegetation Change Tracker (VCT) (Huang et al. 2010), Breaks for Additive Season and Trend (BFAST) (Verbesselt et al. 2010a; Verbesselt et al. 2010b). Among these algorithms, LandTendr has been recognized for its efficiency in detecting forest disturbances such as fire, deforestation, and urban expansion (de Jong et al. 2021; Rodman et al. 2021). For instance, Li et al (2024) mapped planted forest age using LandTendr algorithm, demonstrating its efficiency and reliable for forest age mapping. However, these approaches are limited to obtaining forest age in areas with disturbance recorded by remote sensing, thus restricting a comprehensive understanding of forest age structures. Consequently, it is necessary to develop a framework that can provide comprehensive forest age

---

information on a large scale.

**2. Line 86: Why is China divided into these eight vegetation regions?**

**Reply:** Given this topographic, climatic and vegetation species diversity, China harbors eight main vegetation regions (Wu 1980; Zhang ,2007). The age distribution characteristics of different vegetation types vary (Harms et al.2001; Chen et al.2007; Magnani et al.2001; Li et al.2007). Therefore, we have established age models for each vegetation region. The application of eight vegetation regions division is widely applied in the ecological field and generating remote sensing products at national scale (Sun, Sang, and Axmacher 2020; He et al. 2017; Wang et al. 2021; Liu et al. 2022). For the division basis of eight vegetation regions, we have added literature citations in Line 96.

**3. Line 104: Why is there a distinction between planted forest and natural forest, what is the purpose of the authors, respectively, and what is the difference between planted forest and natural forest in algorithm.**

**Reply:**

The effects of natural and planted forests on forest age are different. Therefore, we took forest origin (plantation forest and natural forest) as the influence factor of forest age, processed it into dummy variable for quantification, and participated in the machine learning modeling of forest age model.

Different forest origins may lead to different forest age distributions and changes.

Natural and planted forests have distinct age distributions. Natural forests have a complex stand age distribution, with different tree species and heights having different ages, forming a complex canopy structure and species diversity. Planted forests have a simple age distribution, with mostly the same tree species and height, and lower ages, because planted forests are mainly for meeting human economic needs, so they are harvested when the trees reach a certain growth period, making it difficult to form long-lived trees (Guo et al. 2014; Jiao et al. 2003).

**4. Line 118: the resolution of Climate data (30 arc-second) is not consistent with it in Table 1.**

**Reply:** 30 arc-seconds is approximately equal to 1 kilometer. The mistake has been corrected according to your detailed professional suggestion in Line 146.

**5. Line 123: Why the PC1 gives annual trends in temperature and precipitation, PC2 gives seasonal variations in temperature and precipitation, and PC3 gives precipitation and temperature extremes?**

**Reply:** We apologize for the omission of the PCA principal component analysis results

in the Supplementary section, and have already been supplemented. Please check the supplementary Table 1.

Supplementary Table1 shows the factor score coefficient matrix of the first three components PC1, PC2, PC3, we find that:

- (1) PC1 is related to BIO1, BIO2, BIO5, BIO6, BIO9, BIO10, BIO12 and BIO18, which represent annual trends in temperature and precipitation.
- (2) PC2 is related to BIO3, BIO4, BIO7, BIO11 and BIO15. These factors mainly reflect seasonal variations in temperature and precipitation
- (3) PC3 is related to BIO8, BIO13, BIO14, BIO16, BIO17, and BIO19, and these factors reflect precipitation and temperature extremes.

Therefore, the PC1 gives annual trends in temperature and precipitation, PC2 gives seasonal variations in temperature and precipitation, and PC3 gives precipitation and temperature extremes.

**Supplementary Table1** Principal component analysis of 19 bioclimatic variables

| Variables | Describe                                                   | Principal Component |        |        |
|-----------|------------------------------------------------------------|---------------------|--------|--------|
|           |                                                            | PC1                 | PC2    | PC3    |
| BIO1      | Annual Mean Temperature                                    | 0.272               | 0.112  | 0.224  |
| BIO2      | Mean Diurnal Range (Mean of monthly (max temp - min temp)) | -0.205              | 0.177  | -0.145 |
| BIO3      | Isothermality (BIO2/BIO7) ( $\times 100$ )                 | -0.129              | 0.403  | -0.123 |
| BIO4      | Temperature Seasonality (standard deviation $\times 100$ ) | 0.039               | -0.476 | 0.128  |
| BIO5      | Max Temperature of Warmest Month                           | 0.266               | -0.093 | 0.261  |
| BIO6      | Min Temperature of Coldest Month                           | 0.262               | 0.181  | 0.200  |
| BIO7      | Temperature Annual Range (BIO5-BIO6)                       | -0.059              | -0.447 | 0.041  |
| BIO8      | Mean Temperature of Wettest Quarter                        | 0.221               | 0.029  | 0.447  |
| BIO9      | Mean Temperature of Driest Quarter                         | 0.253               | 0.220  | 0.097  |
| BIO10     | Mean Temperature of Warmest Quarter                        | 0.272               | -0.069 | 0.264  |
| BIO11     | Mean Temperature of Coldest Quarter                        | 0.243               | 0.253  | 0.168  |
| BIO12     | Annual Precipitation                                       | 0.272               | -0.013 | -0.271 |
| BIO13     | Precipitation of Wettest Month                             | 0.256               | 0.077  | -0.266 |
| BIO14     | Precipitation of Driest Month                              | 0.255               | -0.147 | -0.257 |
| BIO15     | Precipitation Seasonality (Coefficient of Variation)       | -0.198              | 0.286  | 0.066  |
| BIO16     | Precipitation of Wettest Quarter                           | 0.255               | 0.110  | -0.269 |
| BIO17     | Precipitation of Driest Quarter                            | 0.248               | -0.165 | -0.275 |
| BIO18     | Precipitation of Warmest Quarter                           | 0.211               | 0.210  | -0.162 |
| BIO19     | Precipitation of Coldest Quarter                           | 0.250               | -0.124 | -0.303 |

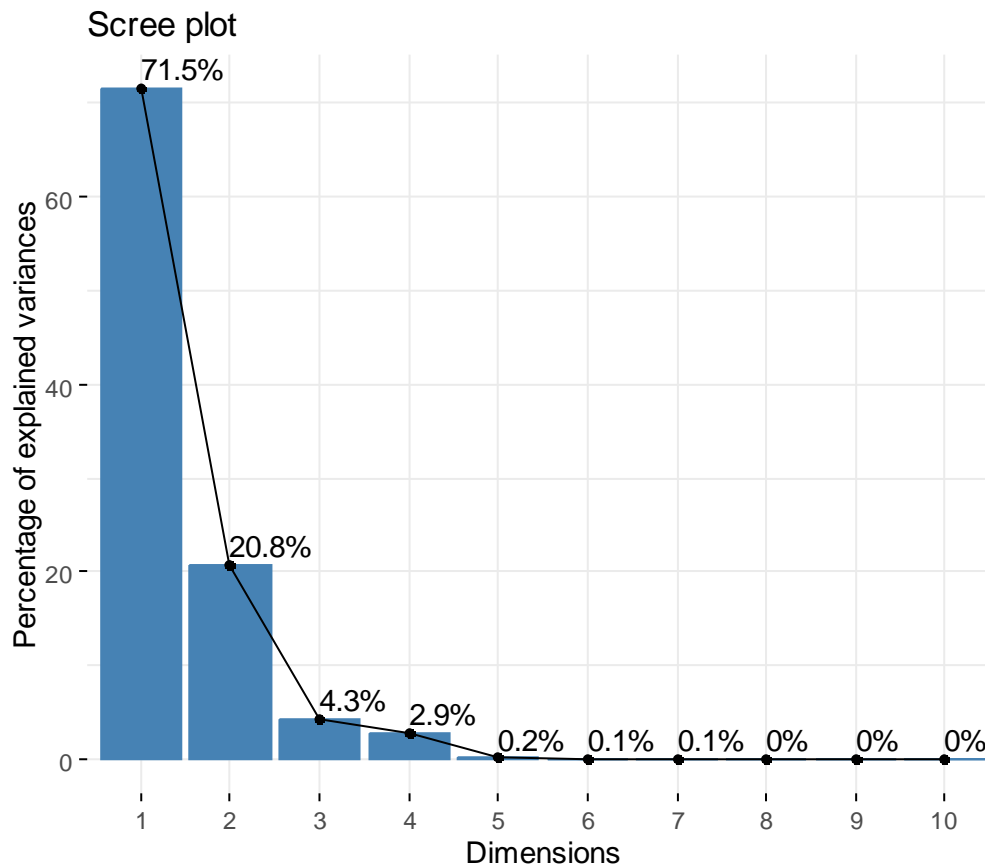

**Supplementary Figure1** Scree plot of 19 bioclimatic variables

**6. Line 146: The algorithm description and detail of forest age in changed area and forest age in unchanged area is missing.**

**Reply:** Thank you very much for your professional advice, we have adjusted a clear description of the overall algorithm design and objectives. In addition, we have described how the two methods will be integrated in conjunction with each other. Please check below (Line 211-217).

Given the extensive forest coverage in China, it is challenging to handle such large forest area for ML and the LandTrendr algorithm to estimate forest age, even with our vegetation zoning efforts. To enhance the efficiency of forest age estimation and conserve computational resources, we have divided China into  $1^{\circ} \times 1^{\circ}$  grids (see Supplementary Figure 2), limiting ML and LandTrendr algorithms to estimate forest age within each grid. Subsequently, we merge the predictive results from each grid using the Mosaic New Raster tool in ArcGIS Pro 3.0 to obtain nationwide forest age map. Finally, the forest age map estimated through LandTrendr algorithm is applied to update the ML-based results to produce China's forest age data.

**7. Line 235: which is the year of China's forest age map? Is it 2020? Use LandTrendr to look back at the age of forests during 1985-2020, but why not**

present the age change in the results. Please refer to Xiao, 2023 and Huang, 2023 for details

**Reply:** We appreciate the reviewer’s insightful suggestion. After sorting out the whole method part, we present the corresponding age detected by LandTrendr in Figure 4b, and made description about this result. Please see below or check in Line 260-265.

Based on the optimal MLAs and the LandTrendr change detection algorithm, we have obtained forest age data for China as shown in Figure 4. Figure 4a presents the nationwide distribution of forest age as estimated by MLAs, whereas Figure 4b displays the age distribution from 1985 and 2020 as determined through change detection. The results reveal that reforestation activities from 1985 and 2020 are primarily situated in the southern, southeastern, and northern China, aligning with the findings from Xiao et al (2023). Furthermore, estimates derived from MLAs indicate that old-growth forests are primarily located in the northeast and southwest regions of China.

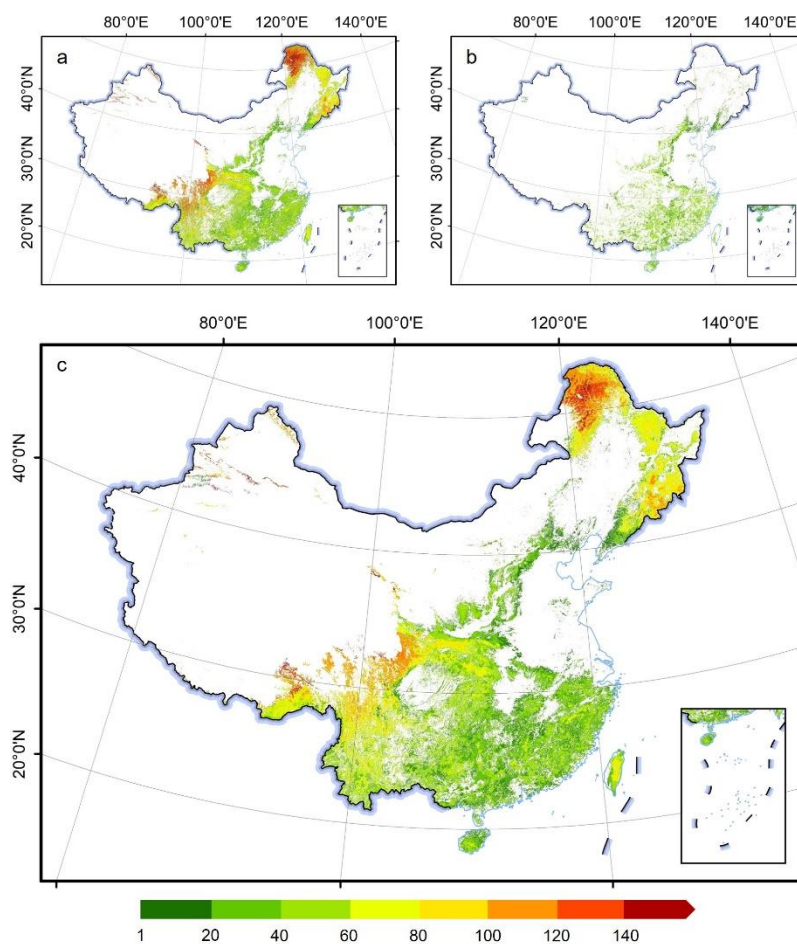

**Figure 4.** Forest age estimated from LandTrendr (a), MLA (b), and final China’s forest age distribution (c) with 30 m resolution.

---

**8. The discussion part of this paper is a little limited, which is all about input data constraints, having no limitations of the algorithm. whether forest age estimation should be combined with forest restoration and other conditions, and whether the parameters of LandTrendr algorithm will affect the detection results.**

**Reply:** We agreed with the reviewer's comments and added the method limitations to the discussion section, including the current limitations of machine learning and limitations specific to the change detection algorithm. Please see below or check in Line 388-400.

Regarding to methods, we combined MLA and disturbance detection approach to derive forest age, for MLA, overfitting is a common challenge, where a model learns the training data too well and fails to generalize to unseen data (Belgiu and Drăguț 2016). The results presented in Supplementary Table 5 suggest that the constructed forest age models exhibit a certain degree of overfitting, which can cause some errors for forest age estimation. Addressing the issue of overfitting, data augmentation and exploring new deep learning algorithms may be promising directions for further investigation. For LandTrendr approach, it is affected by different parameters such as input bands, vegetation parameters (NBR index), climates, vegetation, terrain and atmospheric conditions (Banskota et al. 2014; Hermosilla et al, 2015; Hua et al, 2021; Huang et al, 2023; Yang et al, 2018). China's unprecedented development has led to extensive land cover changes, making it one of the most intensively managed forest regions globally (Tong et al., 2020). This has resulted in significant forest fragmentation, posing challenges in using NBR and other indices for change detection (Li et al 2024), and creating uncertainty in forest age identification. Furthermore, while the LandTrendr algorithm effectively captures sharp disturbances like fires, clearcutting, and reforestation, it falls short in detecting subtle changes such as silviculture and thinning (Huang et al. 2023; Zhu 2017), This limitation may lead to the omission of young trees and an overestimation of forest age.

**References:**

- Banskota, A., Kayastha, N., Falkowski, M. J., Wulder, M. A., Froese, R. E., & White, J. C. (2014). Forest Monitoring Using Landsat Time Series Data: A Review. *Canadian Journal of Remote Sensing*, 40(5), 362–384.  
<https://doi.org/10.1080/07038992.2014.987376>
- Belgiu, M., & Drăguț, L. (2016). Random forest in remote sensing: A review of applications and future directions. *ISPRS Journal of Photogrammetry and Remote Sensing*, 114, 24-31
- Chen, H. Y. H., & Popadiouk, R. V. (2002). Changes in spatial patterns with different forest age classes in boreal mixedwood forests. *Forest Ecology and Management*,

---

158(3), 283-293.

- Chen, Dong, Tatiana V. Loboda, Alexander Krylov, and Peter V. Potapov. Mapping stand age dynamics of the Siberian larch forests from recent Landsat observations, *Remote Sensing of Environment*, 187: 320-31. <https://doi.org/10.1016/j.rse.2016.10.033>, 2016.
- de Jong, S.M., Shen, Y., de Vries, J., Bijnaar, G., van Maanen, B., Augustinus, P., & Verweij, P. (2021). Mapping mangrove dynamics and colonization patterns at the Suriname coast using historic satellite data and the LandTrendr algorithm. *International Journal of Applied Earth Observation and Geoinformation*, 97, 102293
- Guo, Q., & Ren, H. (2014). Productivity as related to diversity and age in planted versus natural forests. *Global Ecology and Biogeography*, 23(12), 1461-1471.
- Harms, K. E., Condit, R., Hubbell, S. P., & Foster, R. B. (2001). Habitat associations of trees and shrubs in a 50-ha neotropical forest plot. *Journal of Ecology*, 89(6), 947-959.
- He, Bin, Aifang Chen, Weiguo Jiang, and Ziyue Chen. 2017. 'The response of vegetation growth to shifts in trend of temperature in China', *Journal of Geographical Sciences*, 27: 801-16.
- Hermosilla, T., Wulder, M. A., White, J. C., Coops, N. C., & Hobart, G. W. (2015). Regional detection, characterization, and attribution of annual forest change from 1984 to 2012 using Landsat-derived time-series metrics. *Remote Sensing of Environment*, 170, 121–132. <https://doi.org/10.1016/j.rse.2015.09.004>
- Hua, J., Chen, G., Yu, L., Ye, Q., Jiao, H., & Luo, X. (2021). Improved Mapping of Long-Term Forest Disturbance and Recovery Dynamics in the Subtropical China Using All Available Landsat Time-Series Imagery on Google Earth Engine Platform. *IEEE Journal of Selected Topics in Applied Earth Observations and Remote Sensing*, 14, 2754–2768. <https://doi.org/10.1109/JSTARS.2021.3058421>
- Huang, C., Goward, S.N., Masek, J.G., Thomas, N., Zhu, Z., & Vogelmann, J.E. (2010). An automated approach for reconstructing recent forest disturbance history using dense Landsat time series stacks. *Remote Sensing of Environment*, 114, 183-198
- Huang, Z., Li, X., Du, H., Zou, W., Zhou, G., Mao, F., Fan, W., Xu, Y., Ni, C., Zhang, B., Chen, Q., Chen, J., & Hu, M. (2023). An Algorithm of Forest Age Estimation Based on the Forest Disturbance and Recovery Detection. *IEEE Transactions on Geoscience and Remote Sensing*, 61, 1–18. <https://doi.org/10.1109/TGRS.2023.3322163>
- Jiao-Jun, Z., Zhi-Ping, F., De-Hui, Z., Feng-qi, J., & Takeshi, M. (2003). Comparison of stand structure and growth between artificial and natural forests of *Pinus sylvestris* var. *mongolica* on sandy land. *Journal of Forestry Research*, 14(2), 103-111.
- Kennedy, R.E., Yang, Z., & Cohen, W.B. (2010). Detecting trends in forest disturbance and recovery using yearly Landsat time series: 1. LandTrendr — Temporal segmentation algorithms. *Remote Sensing of Environment*, 114, 2897-2910

- 
- Li, P., & Duan, Q. (2011). Age structure and spatial patterns of different forest types in the Qinling Mountains, China. *Chinese Geographical Science*, 21(5), 605-614.
- Li, P., Li, H., Si, B., Zhou, T., Zhang, C., & Li, M. (2024). Mapping planted forest age using LandTrendr algorithm and Landsat 5–8 on the Loess Plateau, China. *Agricultural and Forest Meteorology*, 344, 109795. <https://doi.org/10.1016/j.agrformet.2023.109795>
- Liu, Xiaoqiang, Yanjun Su, Tianyu Hu, Qiuli Yang, Bingbing Liu, Yufei Deng, Hao Tang, Zhiyao Tang, Jingyun Fang, and Qinghua Guo. 2022. 'Neural network guided interpolation for mapping canopy height of China's forests by integrating GEDI and ICESat-2 data', *Remote Sensing of Environment*, 269: 112844.
- Magnani, F., Mencuccini, M., Borghetti, M., Berbigier, P., Berninger, F., Delzon, S., & Jarvis, P. G. (2007). The human footprint in the carbon cycle of temperate and boreal forests. *Nature*, 447(7146), 848-850.
- Rodman, K.C., Andrus, R.A., Veblen, T.T., & Hart, S.J. (2021). Disturbance detection in landsat time series is influenced by tree mortality agent and severity, not by prior disturbance. *Remote Sensing of Environment*, 254, 112244
- Sun, Siqi, Weiguo Sang, and Jan Christoph Axmacher. 2020. 'China's national nature reserve network shows great imbalances in conserving the country's mega-diverse vegetation', *Science of The Total Environment*, 717: 137159.
- Verbesselt, J., Hyndman, R., Newnham, G., & Culvenor, D. (2010a). Detecting trend and seasonal changes in satellite image time series. *Remote Sensing of Environment*, 114, 106-115
- Verbesselt, J., Hyndman, R., Zeileis, A., & Culvenor, D. (2010b). Phenological change detection while accounting for abrupt and gradual trends in satellite image time series. *Remote Sensing of Environment*, 114, 2970-2980
- Wang, Xiqiang, Rensheng Chen, Chuntan Han, Yong Yang, Junfeng Liu, Zhangwen Liu, Shuhai Guo, and Yaoxuan Song. 2021. 'Soil temperature change and its regional differences under different vegetation regions across China', *International Journal of Climatology*, 41: E2310-E20.
- Wu, Z.Y., 1980. *Vegetation of China*. Science Press, Beijing, China
- Yang, Y., Erskine, P. D., Lechner, A. M., Mulligan, D., Zhang, S., & Wang, Z. (2018). Detecting the dynamics of vegetation disturbance and recovery in surface mining area via Landsat imagery and LandTrendr algorithm. *Journal of Cleaner Production*, 178, 353–362. <https://doi.org/10.1016/j.jclepro.2018.01.050>
- Zhang X S. 2007. *Vegetation map of the People's Republic of China (1:1 000 000)*. Geology Press, Beijing, China
- Zhu, Z. (2017). Change detection using landsat time series: A review of frequencies, preprocessing, algorithms, and applications. *ISPRS Journal of Photogrammetry and Remote Sensing*, 130, 370-384
- Zhu, Z., & Woodcock, C.E. (2014). Continuous change detection and classification of land cover using all available Landsat data. *Remote Sensing of Environment*, 144, 152-171



# 1 2020 forest age map for China with 30 m resolution

2 Kai Cheng<sup>1</sup>, Yuling Chen<sup>1</sup>, Tianyu Xiang<sup>2</sup>, Haitao Yang<sup>1</sup>, Weiyan Liu<sup>3</sup>, Yu Ren<sup>1,4</sup>, Hongcan Guan<sup>5</sup>,  
3 Tianyu Hu<sup>6</sup>, Qin Ma<sup>7</sup>, Qinghua Guo<sup>1,4\*</sup>

4 <sup>1</sup>Institute of Remote Sensing and Geographic Information System, School of Earth and Space Sciences, Peking University,  
5 Beijing 100871, China

6 <sup>2</sup>College of Earth Sciences, Chengdu University of Technology, Chengdu 610059, China

7 <sup>3</sup>State Forestry and Grassland Administration Key Laboratory of Forest Resources & Environmental Management, Beijing  
8 Forestry University, Beijing 100083, China

9 <sup>4</sup>Institute of Ecology, College of Urban and Environmental Sciences, Peking University, Beijing 100871, China

10 <sup>5</sup>School of Tropical Agriculture and Forestry, Hainan University, Haikou 570100, China

11 <sup>6</sup>State Key Laboratory of Vegetation and Environmental Change, Institute of Botany, Chinese Academy of Sciences, Beijing  
12 100093, China

13 <sup>7</sup>School of Geography, Nanjing Normal University, Nanjing 210023, China

14

15 *Correspondence to:* Qinghua Guo (guo.qinghua@pku.edu.cn)

16 **Abstract.** A high-resolution, spatially explicit forest age map is essential for quantifying forest carbon stocks and carbon  
17 sequestration potential. Prior attempts to estimate forest age on a national scale in China have been limited by sparse resolution  
18 and incomplete coverage of forest ecosystems, attributed to complex species composition, extensive forest areas, insufficient  
19 field measurements, and inadequate methods. To address these challenges, we developed a framework that combines machine  
20 learning algorithms (MLAs) and remote sensing time series analysis for estimating the age of China's forests. Initially, we  
21 identify and develop the optimal MLAs for forest age estimation across various vegetation divisions based on forest height,  
22 climate, terrain, soil, and forest-age field measurements, utilizing these MLAs to ascertain forest age information. Subsequently,  
23 we apply the LandTrendr time series analysis to detect forest disturbances from 1985 to 2020, with the time since the last  
24 disturbance serving as a proxy for forest age. Ultimately, the forest age data derived from LandTrendr is integrated with the  
25 result of MLAs to produce the 2020 forest age map of China. Validation against independent field plots yielded an R<sup>2</sup> ranging  
26 from 0.51 to 0.63. On a national scale, the average forest age is 56.1 years (standard deviation of 32.7 years). The Qinghai-  
27 Tibet Plateau alpine vegetation zone possesses the oldest forest with an average of 138.0 years, whereas the forest in the warm  
28 temperate deciduous-broadleaf forest vegetation zone averages only 28.5 years. This 30-m-resolution forest age map offers  
29 crucial insights for comprehensively understanding the ecological benefits of China's forests and to sustainably manage  
30 China's forest resources. The map is available at <http://dx.doi.org/10.5281/zenodo.8354262> (Cheng et al., 2023b).

## 31 1 Introduction

32 Forest age is crucial for gaining insights into forest ecosystem succession and condition, thereby playing a pivotal role in  
33 comprehending the ecological benefits of forests (Lin et al., 2023). China's forests have undergone significant disruptions due

34 to natural disasters and human activities over the past few decades, leading to notable changes in the forest age structure (Niu  
35 et al., 2023). Consequently, this scenario presents considerable challenges in accurately assessing forest ecosystem carbon  
36 storage (Pan et al., 2011; Tong et al., 2020). The complexity of species composition, extensive forest areas, limited field  
37 measurements, and ineffective methods have led to existing national-scale estimates of China's forest age focusing on either  
38 sparse resolution (Zhang et al., 2017) or partial forest ecosystem coverage (Xiao et al., 2023). This has resulted in significant  
39 uncertainties in evaluating the carbon sources and sinks within China's forest ecosystem (Piao et al., 2022; Wang et al., 2022).  
40 Therefore, there is an urgent requirement for time-efficient, high-resolution mapping of forest age across China.  
41 At present, China's forest age data is primarily obtained via the national forest inventory, noted for its high accuracy (Xiao et  
42 al., 2023) but requires extensive labour and material resources and is time-consuming and costly (Liu et al., 2022). Additionally,  
43 most of China's forests are in steep mountainous areas that are difficult to access (Cheng et al., 2023a), which limits the survey  
44 range and uneven distribution of field samples, making it difficult to estimate the age of China's forests on a national scale.  
45 Thus, the traditional forest inventory method struggles to accurately and timely capture the complete age distribution and  
46 spatial characteristics of China's forests.

47 Remote sensing technology has demonstrated effectiveness in estimating forest cover (Su et al., 2020; Tubiello et al., 2023)  
48 and forest structure (Yu et al., 2020; Maltman et al., 2023) across various scales. The availability and sharing of Landsat time  
49 series data, along with the development of Google Earth Engine (GEE) cloud-processing platform have significantly facilitated  
50 the application of remote sensing in forest age estimation. Several studies have been conducted to map China's forest age.  
51 Xiao et al. (2023) mapped the age of China's young forests at 30 m resolution using time series Landsat imagery. Yu et al.  
52 (2020) produced a 1-km resolution map of the age for planted forests in China. Zhang et al. (2017) developed a 1km stand age  
53 map using climate and forest height data. Zhang et al. (2014) mapped a national forest age map with 1 km resolution by using  
54 remote-sensing forest height and forest type data. However, the existing China's forest age maps are typically undertaken at  
55 coarser spatial resolutions (e.g., 1 km), with finer resolutions (e.g., 30 m) being limited to young forests. There remains a lack  
56 of high-resolution forest age spatial dataset covering the entire forest region of China.

57 Statistical models and disturbance detection approaches are two common methods utilized in remote sensing-based forest age  
58 estimations. Statistical models deduce forest age by establishing a coherent relationship between remote sensing features and  
59 field-collected empirical samples, including parametric regression approaches (Maltamo et al., 2020; Schumacher et al., 2020)  
60 and nonparametric machine learning algorithms (MLAs). Growth models represent one of the most widely used parametric  
61 models for estimating forest age (Zhang et al., 2014; Zhang et al., 2017; Yu et al., 2020). However, this type of model relies  
62 on tree species information, posing challenges in forest age derivation when such data is lacking, particularly at large scales.  
63 MLAs has been employed for forest age estimation, owing to their flexibility in addressing complex problems (Alerskans et  
64 al., 2022). For examples, Huang et al (2023) integrated random forest (RF) to derived forest age. Chen et al (2016) mapped  
65 forest stand age dynamics using RF and Landsat imagery. Nevertheless, the application of MLAs to estimate national forest  
66 age has not been deeply explored. Most previous studies used a single MLA, such as Random Forest (RF) (Besnard et al.,  
67 2021b), to estimate forest age. The extensive distribution of forests, diverse forest types, and varying terrain and climate

68 conditions in China make it difficult in using a single model for accurately forest age determination on national scale. Therefore,  
69 exploring the applicability of MLAs for forest age estimation in various regions of China is essential.

70 Disturbance detection approaches, capable of identifying the time of the most recent stand-replacing disturbance, have proven  
71 accurate in forest age estimation (Li et al. 2024), which mainly include Landsat-based Detection of Trends in Disturbance and  
72 Recovery (LandTrendr) (Kennedy et al. 2010), Continuous Change Detection and Classification (CCDC) (Zhu and Woodcock  
73 2014), the Vegetation Change Tracker (VCT) (Huang et al. 2010), Breaks for Additive Season and Trend (BFAST) (Verbesselt  
74 et al. 2010a; Verbesselt et al. 2010b). Among these algorithms, LandTrendr has been recognized for its efficiency in detecting  
75 forest disturbances such as fire, deforestation, and urban expansion (de Jong et al. 2021; Rodman et al. 2021). For instance, Li  
76 et al (2024) mapped planted forest age using LandTrendr algorithm, demonstrating its efficiency and reliable for forest age  
77 mapping. However, these approaches are limited to obtaining forest age in areas with disturbance recorded by remote sensing,  
78 thus restricting a comprehensive understanding of forest age structures. Consequently, it is necessary to develop a framework  
79 that can provide comprehensive forest age information on a large scale.

80 The objective of the present study is to generate the first China's forest age dataset at 30 m resolution using multi-source  
81 datasets through combining remote sensing time series analysis and MLAs. This involves: 1) identifying the most optimal  
82 MLA for age estimation across various vegetation zone in China and estimating the age of China's forests. 2) Utilizing  
83 LandTrendr disturbance detection algorithm to identify the most recent forest disturbances from 1985 to 2020, and estimating  
84 the forest of these disturbed areas. 3) Using the forest age derived by LandTrendr algorithm to update the result of MLAs to  
85 generate China's forest age map, which is then subjected to validation. The generated 30-m-resolution forest age map provides  
86 critical information to quantify forest carbon storage and to sustainably manage China's forests.

## 87 **2 Materials and methods**

### 88 **2.1 Dataset and pre-processing**

#### 89 **2.1.1 Forest inventory data**

90 The data from China's seventh national forest inventory survey from 2004 to 2008 (<http://www.forestry.gov.cn/>) were  
91 collected to develop models to estimate forest age. The inventory involves systematically and accurately monitoring the  
92 national forest resources based on 667 m<sup>2</sup> sample plots covering the whole country (Ren et al., 2011). The main information  
93 collected from the sample plots are tree species, stand age, average tree height, and geographic location. The stand age is  
94 determined based on the planting time or is estimated using tree diameter at breast height (Zhang et al., 2017). We totally  
95 collected 58,033 field plots ranging in age from 1 to 480 years (Figures 1b and 1c). The mean age of the samples is 34.0 years,  
96 with a standard deviation of 29.6 years. The sample plots were distributed across eight vegetation divisions (Liu et al. 2022)  
97 (Figure 1b), each containing at least 436 sample plots for building MLA models to estimate forest age (Figure 1d).

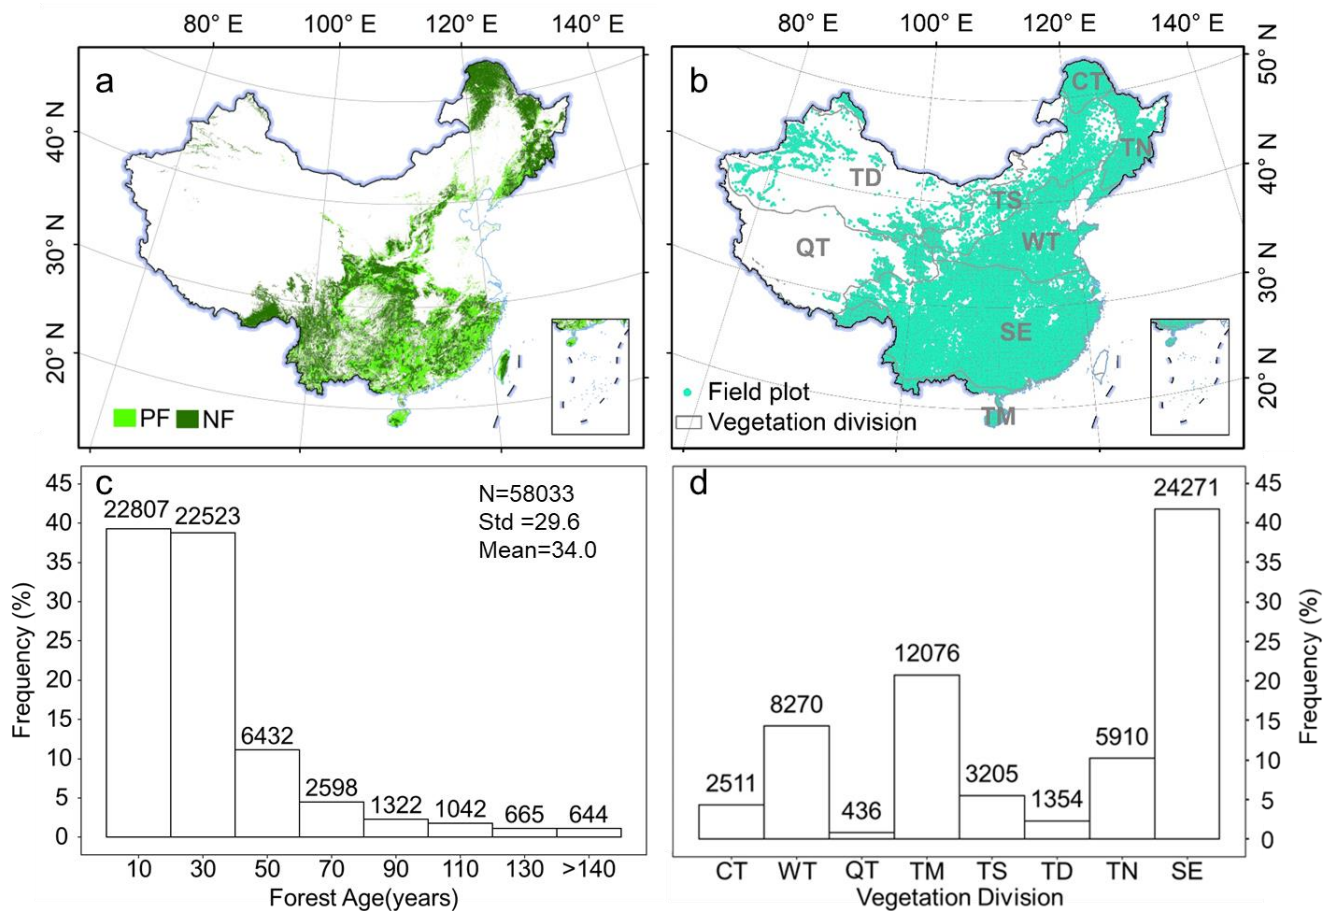

98

99 Figure 1. Forest mask and field sample distribution. (a) Planted forest and natural forest mask generated by Cheng et al. (2023a).  
 100 (b) Distribution of field samples over eight vegetation divisions. (c) Frequency distribution of field sample ages. (d) Frequency  
 101 distribution of field samples for eight vegetation divisions. PF: planted forest, NF: natural forest, CT: Cold Temperate  
 102 needleleaf forest, WT: Warm Temperate deciduous-broadleaf forest, QT: Qinghai-Tibet Plateau alpine vegetation, TM:  
 103 Tropical Monsoon forest-rainforest, TS: Temperate Steppe, TD: Temperate Desert, TN: Temperate Needleleaf-broadleaf  
 104 mixed forest, SE: Subtropical Evergreen broadleaf forest. N: the number of plots, Std: standard deviation, Mean: mean age.

### 105 2.1.2 Landsat time-series data

106 From the GEE platform, we collected Landsat TM, ETM+, OLI Tier 1 surface reflectance images dating from 1985 to 2020  
 107 to estimate forest age for disturbed forest regions. All data were atmospherically corrected and processed by the Land Surface  
 108 Reflectance Code and the Landsat Ecosystem Disturbance Adaptive Processing System algorithms. We removed the clouds  
 109 or cloud shadows using the C function of the mask algorithm (Du et al., 2023), then we created composited images using a  
 110 median compositing method for forest regions. Finally, we calculated the normalized burn ratio (NBR) to detect forest

111 disturbance. NBR has been proved effective in numerous studies detecting forest disturbance (Du et al., 2023; Tian et al.,  
112 2023). It is calculated as follows by using the near-infrared (NIR) and short-wave infrared (SWIR) bands:

$$NBR = \frac{NIR - SWIR}{NIR + SWIR} \quad (\text{Eq. 1})$$

### 113 **2.1.3 Forest mask**

114 This study uses the 2020 dataset of planted and natural forests at 30 m resolution in China (Figure 1a) as a mask for forest age  
115 mapping. This dataset is produced by integrating multisource remote-sensing data and a large number of crowdsourced samples,  
116 with an overall accuracy of over 80% (Cheng et al., 2023a). In this study, we employ this dataset as a forest mask and utilize  
117 a combination of time series change detection algorithms and MLAs to trace the age of these planted and natural forests.

### 118 **2.1.4 Forest height data**

119 The canopy height data for China was downloaded from the website (<https://3decology.org/>), which was generated based on  
120 deep learning by integrating Global Ecosystem Dynamics Investigation and Ice, Cloud and land Elevation Satellite -2 data.  
121 This dataset has a spatial resolution of 30 m and corresponds to 2019. The accuracy of this national forest canopy height data  
122 was assessed by comparing three independent validation datasets, indicating high accuracy for the canopy height product by  
123 neural network guided interpolation ( $R^2 \geq 0.55$ ,  $RMSE \leq 5.5$  m) (Liu et al., 2022). Notably, the forest extent used in this dataset  
124 is consistent with the forest extent mentioned earlier for planted and natural forests, ensuring spatial consistency when  
125 estimating forest age.

### 126 **2.1.5 Climate data**

127 Climate data were acquired from **WorldClim** 2.1 (<https://worldclim.org/>), which offers 19 bioclimatic variables, including  
128 temperature and precipitation, with 30 arc-second resolutions. The 19 bioclimatic variables include annual trends, seasonality,  
129 and extreme environmental factors in temperature and precipitation. We resampled the 19 GeoTiff (.tif) files to 30 m resolution  
130 using a nearest-resampling method for spatial resolution consistency. To reduce the dimension of bioclimatic variables, we  
131 applied a principal component analysis to map the 19 bioclimatic variables into a new principal component (PC) space. We  
132 use the first three components PC1, PC2, PC3 to represent the climate factors. According to the results of the analysis, PC1  
133 gives annual trends in temperature and precipitation, PC2 gives seasonal variations in temperature and precipitation, and PC3  
134 gives precipitation and temperature extremes (**Supplementary Table 1**).

### 135 **2.1.6 Soil data**

136 Soil data were extracted from the harmonized world soil database, V1.2, developed jointly by the Food and Agriculture  
137 Organization of the United Nations, the International Institute for Applied Systems, the ISRIC-World Soil Information, the  
138 Institute of Soil Science, Chinese Academy of Sciences, and the Joint Research Centre of the European Commission with a

139 resolution of 30 arc-seconds. As per previous studies, soil type and texture were selected from the soil dataset in this study to  
 140 construct the model to estimate forest age (Besnard et al., 2021). We also resampled the soil data to 30 m using a nearest-  
 141 resampling method.

## 142 2.1.7 Topographic data

143 The Shuttle Radar Topography Mission (SRTM) V3 provides global digital elevation data at 30 m resolution and was used in  
 144 this study to extract topographic variables (Su et al., 2020). Three topographic features, elevation, slope, and aspect, were  
 145 calculated to estimate forest ages.

146 **Table 1.** Descriptions of variables used to estimate the forest age of China.

| Data type                 | Data source                                                                                                                                                                                                                                                            | Resolution    | Time          | Variables                    |
|---------------------------|------------------------------------------------------------------------------------------------------------------------------------------------------------------------------------------------------------------------------------------------------------------------|---------------|---------------|------------------------------|
| Remote sensing images     | Landsat TM/ETM+/OLI                                                                                                                                                                                                                                                    | 30m           | 1985–<br>2020 | NBR                          |
| Forest mask               | Planted and natural forest map (Cheng et al., 2023a)                                                                                                                                                                                                                   | 30m           | 2020          | Planted and natural forest   |
| Forest canopy height data | NNGI-Forest Canopy Height                                                                                                                                                                                                                                              | 30m           | 2019          | Forest height                |
| Climate data              | WorldClim version 2.1 (Fick and Hijmans 2017)                                                                                                                                                                                                                          | 30 arc-second | 1970–<br>2000 | PC1, PC2, PC3                |
| Soil data                 | Harmonized World Soil Database V1.2( <a href="https://www.fao.org/soils-portal/data-hub/soil-maps-and-databases/harmonized-world-soil-database-v12/en/">https://www.fao.org/soils-portal/data-hub/soil-maps-and-databases/harmonized-world-soil-database-v12/en/</a> ) | 30 arc-second | 1971–<br>1981 | Soil type, soil texture      |
| Topographic data          | SRTM DEM                                                                                                                                                                                                                                                               | 30 m          | 2000          | Elevation, slope, and aspect |

147

## 148 2.2 Forest age estimation

149 To generate the forest age map for China and explore the performance of MLAs to retrieve forest age, we applied two  
 150 approaches to estimate forest age in China: The MLA-based approach and the LandTrendr disturbance detection approach.  
 151 First, the MLA-based approach estimates ages for forest regions using forest inventory and multi-source remote sensing data.  
 152 Second, the LandTrendr algorithm is applied to detect stand-replacing disturbances based on the Landsat time series images.  
 153 Third, we use the forest age map detected by LandTrendr to update the forest age map derived using MLA-based approach,

154 and generate the China's forest age map with 30 m resolution. Figure 2 shows a detailed flowchart describing the framework  
155 for forest age estimation proposed in this study.

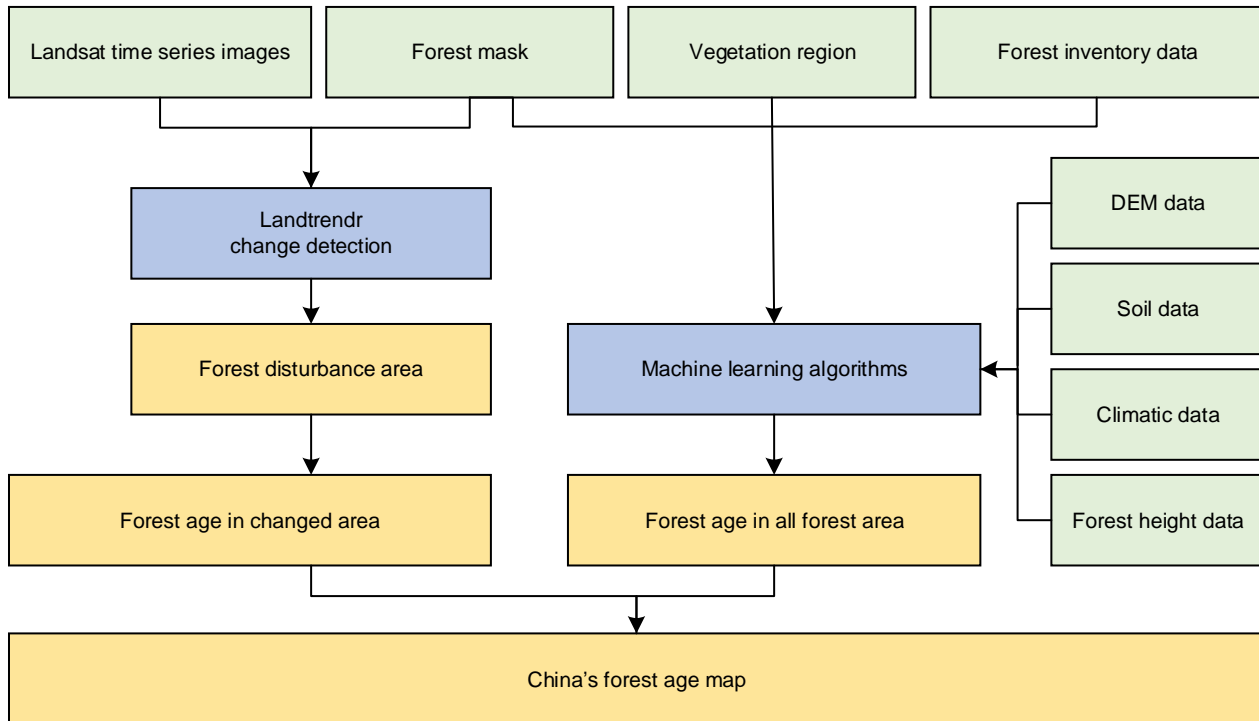

156  
157 **Figure 2.** Framework of China's forest age estimation.

### 158 **2.2.1 Machine learning approach**

#### 159 **(1) MLA selection**

160 This study used the following model-screening procedure to explore which model works best for each vegetation division.  
161 First, we used the automated machine learning (Auto-ML) open-source Python library LazyPredict to filter for alternative  
162 models. LazyRegressor (including 40 MLAs) was used to build stand-age estimation models based on all data, which helps to  
163 understand which MLA works well without tuning parameters. The performing models with  $R^2$  greater than 0.60 in each  
164 vegetation division were concentrated in thirteen MLAs (Supplementary Table 2). Second, by splitting training data and testing  
165 data, the top three MLAs for each vegetation division were determined (Supplementary Table 2). It can be found that the  
166 potential optimal models of eight vegetation divisions is concentrated in RF, Gradient Boosting Decision Tree (GBDT),  
167 Histogram Gradient Boosting (HistGradientBoost), Light Gradient Boosting Machine (LightGBM), and Categorical Boosting  
168 (CatBoost).

169 RF is an ensemble learning method that combines multiple decision trees (Breiman 2001; Dutta et al., 2020). It leverages the  
170 wisdom of crowds to make accurate predictions. RF mitigates overfitting and provides robust results by training each tree on  
171 a random subset of the data and features (Lavanya et al., 2017; Guo et al., 2019). GBDT is an ensemble technique that builds



172 a strong predictive model by sequentially training decision trees (Jerome 2001). Each tree corrects the errors of its predecessor  
173 (Wei et al., 2019), resulting in a highly accurate and robust model. HistGradientBoost is a variant of GBDT that employs  
174 histogram-based techniques. It efficiently approximates data distributions and reduces memory consumption during training.  
175 This algorithm is particularly beneficial when dealing with large datasets and complex features (Tefagorghish et al., 2022).  
176 LightGBM is a gradient-boosting framework that prioritizes speed and efficiency. It employs a histogram-based approach and  
177 parallel computing, making it suitable for large datasets. CatBoost is a new modification gradient boosting algorithm that is  
178 designed specifically for handling categorical features. It automatically encodes categorical variables, simplifying the data pre-  
179 processing stage. CatBoost is known for its robustness and efficiency, can achieve high accuracy on a small-scale dataset.  
180 We implemented RF, GBDT, and HistGradientBoost by using the Scikit-learn package of Python 3.9.11, while the LightGBM  
181 and CatBoost algorithms were constructed by using the lightgbm and catboost packages of Python 3.9.11.

## 182 (2) Hyperparameter tuning

183 Hyperparameter tuning of MLAs is critical in the ML model training process because it significantly enhances the model's  
184 performance, generalization capability, and adaptability (Sandha et al., 2020). Bayesian optimization has been selected for  
185 hyperparameter tuning due to its complicated derivative evaluation, and nonconvex-function-related features (Mekruksavanich  
186 et al., 2022). It is implemented by using Optuna, an open source hyperparameter optimization framework to automate  
187 hyperparameter searches (Akiba et al., 2019). The hyperparameters and their searching range in MLAs are listed in  
188 **Supplementary Table 3.**

## 189 (3) Model interpretation

190 Furthermore, we used Shapley Additive explanations (SHAP) values (Lundberg and Lee, 2017; Lundberg et al., 2019), a  
191 model-agnostic technique for interpreting ML models, to explore functional correlations between the variables and forest age  
192 (Besnard et al. 2021). SHAP derives the Shapely additive contribution values from coalitional game theory (Kim et al. 2023).  
193 By examining the contribution of each input variable to the model's output, SHAP can identify the primary drivers of the  
194 model's predictions and provide insights into the underlying causes that influence forest age (Sun et al. 2023). The higher the  
195 SHAP value, the larger the contribution of the variable. Here we calculated SHAP value using *shap* package in Python.

## 196 **2.2.2 LandTrendr disturbance detection approach**

197 LandTrendr was designed to detect and analyse changes in surface features, particularly disturbances and recovery processes,  
198 and is commonly applied to multispectral remote sensing imagery from the Landsat satellite series to capture long-term forest  
199 disturbances (Du et al., 2022). Using LandTrendr to detect forest age involves the following steps:

- 200 (1) Time series data transformation. LandTrendr transforms multiple temporal remote-sensing image datasets into a series of  
201 indices, such as the NBR.
- 202 (2) Breakpoint detection. Using the generated time series indices, LandTrendr retraces from the state in 2020 in search of  
203 breakpoints in the time series. These breakpoints signify transition points in the time series, which indicate instances of surface  
204 disturbance or recovery.



205 (3) Age estimation. By pinpointing breakpoints, the time of occurrence for each breakpoint is established. Forest age estimates  
 206 for the current location are accomplished by subtracting the breakpoint time from the latest time.  
 207 LandTrendr was implemented on the GEE platform by using the function of *runLT()* provided by the LT\_GEE API (Kennedy  
 208 et al., 2018). Table 1 lists the main input parameters.  
 209 **Table 1.** Parameters of LandTrendr used in this study.

| Parameters             | Definition                                                                                                                                                               | Value |
|------------------------|--------------------------------------------------------------------------------------------------------------------------------------------------------------------------|-------|
| maxSegments            | Maximum number of segments to be fitted on the time series                                                                                                               | 10    |
| spikeThreshold         | Threshold for dampening the spikes (1.0 means no dampening)                                                                                                              | 0.9   |
| vertexCountOvershoot   | The initial model can overshoot the maxSegments + 1 vertices by this amount. Later, it will be pruned down to maxSegments + 1                                            | 3     |
| preventOneYearRecovery | Prevent segments that represent one-year recoveries                                                                                                                      | False |
| recoveryThreshold      | If a segment has a recovery rate faster than 1/recovery threshold (in years), then the segment is disallowed                                                             | 0.25  |
| pvalThreshold          | If the <i>p</i> -value of the fitted model exceeds this threshold, then the current model is discarded and another one is fit by using the Levenberg–Marquardt optimizer | 0.05  |
| bestModelProportion    | Takes the model with most vertices that has a <i>p</i> -value that is at most this fraction away from the model with the lowest <i>p</i> -value                          | 0.75  |
| minObservationsNeeded  | Minimum observations required to perform output fitting                                                                                                                  | 6     |

210

### 211 **2.2.3 China's forest age prediction**

212 Given the extensive forest coverage in China, it is challenging to handle such large forest area for ML and the LandTrendr  
 213 algorithm to estimate forest age, even with our vegetation zoning efforts. To enhance the efficiency of forest age estimation  
 214 and conserve computational resources, we have divided China into 1°×1° grids (see Supplementary Figure 2), limiting ML  
 215 and LandTrendr algorithms to estimate forest age within each grid. Subsequently, we merge the predictive results from each  
 216 grid using the Mosaic New Raster tool in ArcGIS Pro 3.0 to obtain nationwide forest age map. Finally, the forest age map  
 217 estimated through LandTrendr algorithm is applied to update the ML-based results to produce China's forest age data.

## 218 2.3 Accuracy assessment

### 219 2.3.1 Comparison with field samples

220 We collected field samples through two sources to validate the generated final forest age map. The first is the forest inventory  
221 samples independent of training data. The second source involves validation samples obtained from the literatures. To ensure  
222 the samples collected were representative, we excluded samples dated before 2010. As validation metrics, we used the  
223 coefficient of determination ( $R^2$ ), the root mean square error (RMSE), the mean absolute error (MAE), and the mean error  
224 (ME). These are given mathematically as

$$R^2 = 1 - \frac{\sum_{i=1}^n (y_i - \hat{y}_i)^2}{\sum_{i=1}^n (y_i - \bar{y}_i)^2} \quad (2)$$

$$RMSE = \sqrt{\frac{1}{n} \sum_{i=1}^n (y_i - \hat{y}_i)^2}, \quad (3)$$

$$MAE = \frac{1}{n} \sum_{i=1}^n |y_i - \hat{y}_i|, \quad (5)$$

$$ME = \frac{\sum_{i=0}^n (y_i - \hat{y}_i)}{n}, \quad (6)$$

225 where  $y_i$  is the observed value for the  $i$ th analytic tree,  $\hat{y}_i$  is the predicted value of the  $i$ th observed value,  $n$  is the number of  
226 trees, and  $\bar{y}_i$  is the mean of the observed value.

### 227 2.3.2 Comparison with existing forest age data

228 To make our forest age map more reliable and comparable, we also downloaded global forest age data product produced by  
229 Besnard et al. (2021a), which is the only forest age map that can be publicly accessible covering entire China's forests. Then,  
230 we resampled our result to the same resolution as this global map, and compared our resultant forest age map with it by  
231 assessing their differences in each cell. Additionally, we also collected estimated average forest ages of China by previous  
232 studies, and using these statistical numbers to further validate our estimation.

## 233 3 Results

### 234 3.1 MLA performance for China's forest age estimation

235 Through a rigorous hyperparameter-optimization process and independent validation, four distinct MLAs (RF, GBDT,  
236 LightGBM, and CatBoost) were selected across eight different vegetation divisions (Table 2). GBDT performed exceptionally  
237 well for estimating the forest age of cold temperate needleleaf forest (CT) vegetation zone, producing  $R^2$  of 0.47 and RMSE  
238 of 4.95 years (MAE=17.99, ME=-1.86). RF excelled at estimating the forest age of warm temperate deciduous-broadleaf forest

239 (WT) vegetation zone, producing an independent validation  $R^2$  of 0.61 and RMSE of 3.47 years (MAE=9.13, ME=-0.01).  
 240 CatBoost consistently demonstrated strong performance for the Qinghai-Tibet Plateau alpine vegetation (QT), tropical  
 241 monsoon forest-rainforest (TM), temperate steppe (TS), temperate desert (TD), and subtropical evergreen broadleaf forest (SE)  
 242 zones, with  $R^2$  values ranging from 0.57 to 0.85 and RMSE values from 2.04 to 7.65 years. LGBMRegressor was the preferred  
 243 choice in the temperate needleleaf-broadleaf mixed forest (TN) vegetation division, yielding an  $R^2$  of 0.63 and an RMSE of  
 244 4.14 years.

245 **Table 2.** MLA for eight vegetation divisions and their validation metrics.

| Vegetation division | Algorithm     | $R^2$ | RMSE | MAE   | ME    |
|---------------------|---------------|-------|------|-------|-------|
| CT                  | GradientBoost | 0.47  | 4.95 | 17.99 | -1.86 |
| WT                  | RF            | 0.61  | 3.47 | 9.13  | -0.01 |
| QT                  | CatBoost      | 0.57  | 7.65 | 42.58 | 10.43 |
| TM                  | CatBoost      | 0.85  | 2.04 | 1.34  | -0.08 |
| TS                  | CatBoost      | 0.78  | 4.16 | 11.85 | -0.87 |
| TD                  | CatBoost      | 0.80  | 5.33 | 21.02 | 1.84  |
| TN                  | LGBM          | 0.63  | 4.14 | 12.78 | 0.36  |
| SE                  | CatBoost      | 0.70  | 3.49 | 7.97  | 0.00  |

246  
 247 We further analysed the factors influencing the forest age estimation in each vegetation division, and the findings are illustrated  
 248 in Figure 3. While the prioritization of factors affecting forest age estimation varies across different vegetation divisions,  
 249 canopy height is unquestionably the predominant factor influencing this estimation. Its absolute value is the highest of the CT,  
 250 WT, TN, TS, and TM vegetation zones (Figure 3). Moreover, it is among the top three most influential factors in all the  
 251 remaining vegetation zones. Subsequently, topographical conditions assume prominence, with elevation consistently featuring  
 252 among the top three factors in the SHAP value across all vegetation divisions. In the TD vegetation division, elevation becomes  
 253 the most influential factor. Climate factors earn third-tier consideration, particularly in the SE vegetation zone, where the  
 254 impact of PC2 of the climate factors surpasses that of both canopy height and topographical conditions. In the other vegetation  
 255 divisions, the influence of climate factors generally falls to the mid-range. In contrast, across all eight vegetation divisions,  
 256 factors related to soil, such as soil type and soil texture, do not exert a pronounced influence on forest age estimation.

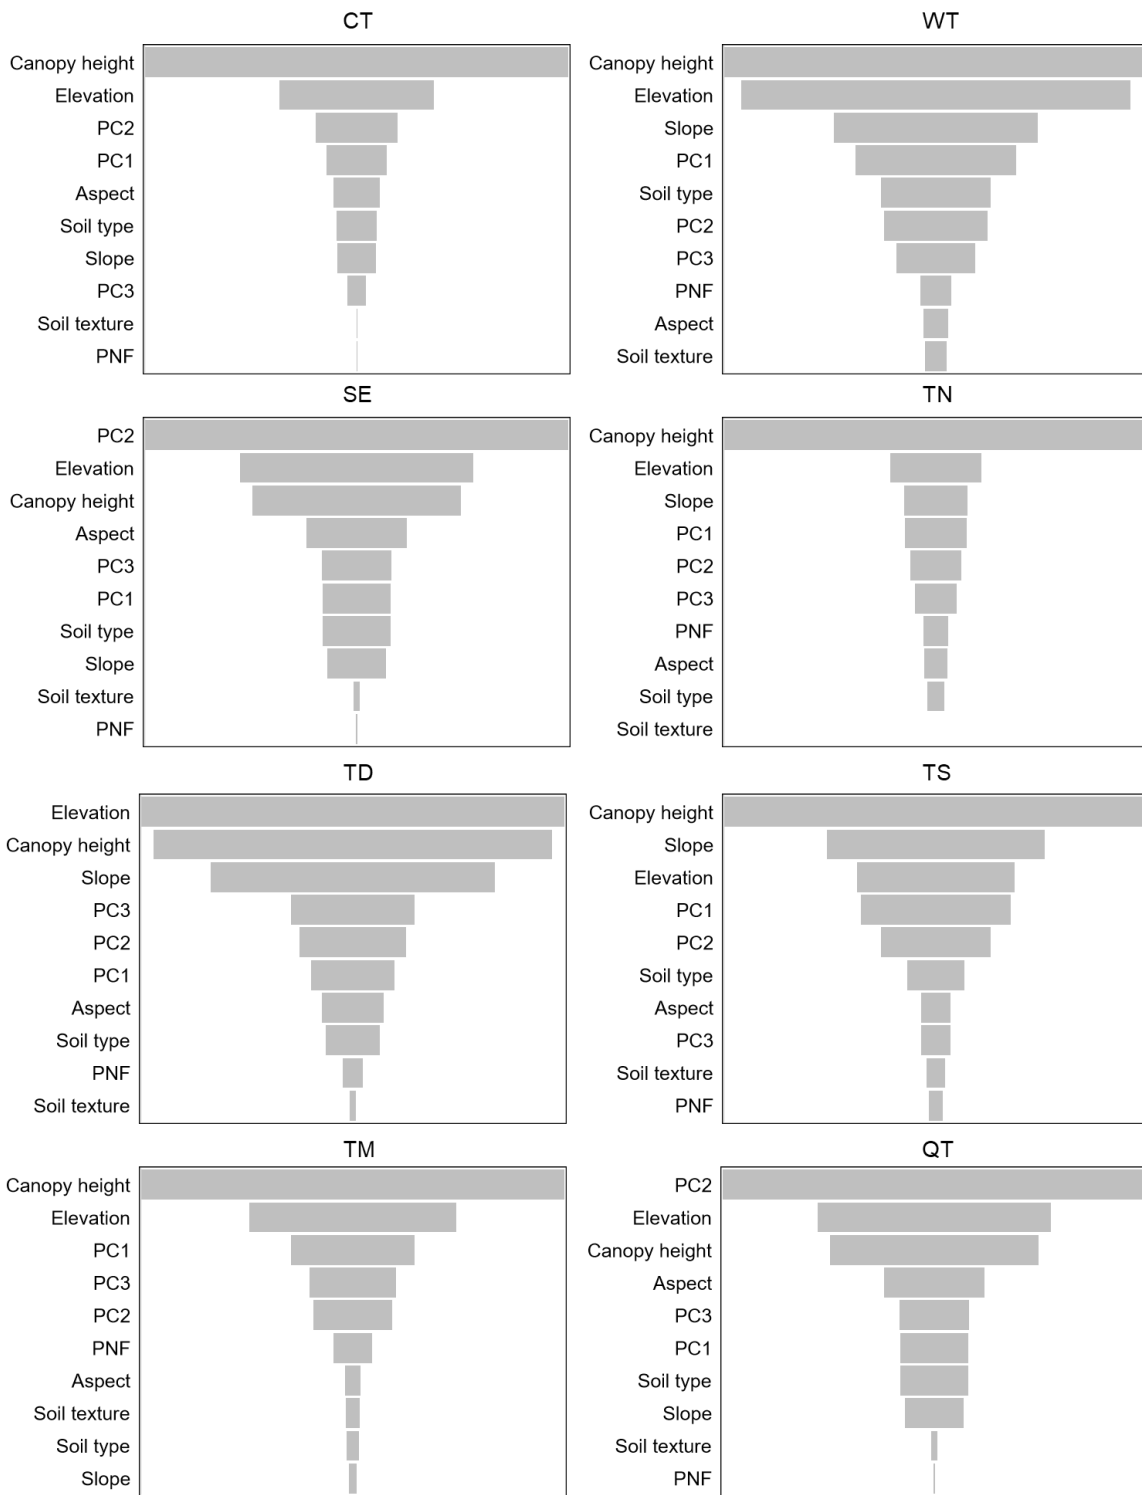

257

258 **Figure 3.** Order of shape values of factors affecting the estimation of forest age in different vegetation zones

### 259 3.2 China's forest age map

260 Based on the optimal MLAs and the LandTrendr change detection algorithm, we have obtained forest age data for China as  
261 shown in Figure 4. Figure 4a presents the nationwide distribution of forest age as estimated by MLAs, whereas Figure 4b  
262 displays the age distribution from 1985 and 2020 as determined through change detection. The results reveal that reforestation  
263 activities from 1985 and 2020 are primarily situated in the southern, southeastern, and northern China, aligning with the  
264 findings from Xiao et al (2023). Furthermore, estimates derived from MLAs indicate that old-growth forests are primarily  
265 located in the northeast and southwest regions of China.

266 The final forest age map for China obtained in this study is depicted in Figure 4c. Statistically, the mean of the estimated  
267 China's forest age is 56.11 years with a standard deviation of 32.67 years. Geographically, forests in northeast and southwest  
268 China are relatively older than those in other regions (Figure 4c). At the provincial scale, the average forest age ranges from  
269 3.9 to 116.8 years (Figure 5a, Supplementary Table 6), whereas Qinghai province has the highest mean forest age, and Hong  
270 Kong has the lowest mean forest age. Forest ages in Sichuan province are more varied than in other provinces (Figure 5a). On  
271 the regional scale, the QT vegetation zones have the oldest forests with an average of 138.0 years, followed by CT (107.6  
272 years), TS (107.0 years), TN (68.3 years), TD (60.3 years), TM (53.0 years), and SE (49.2 years) (Figure 5b, Supplementary  
273 Table 7). The WT vegetation zones have the youngest forests (28.5 years).

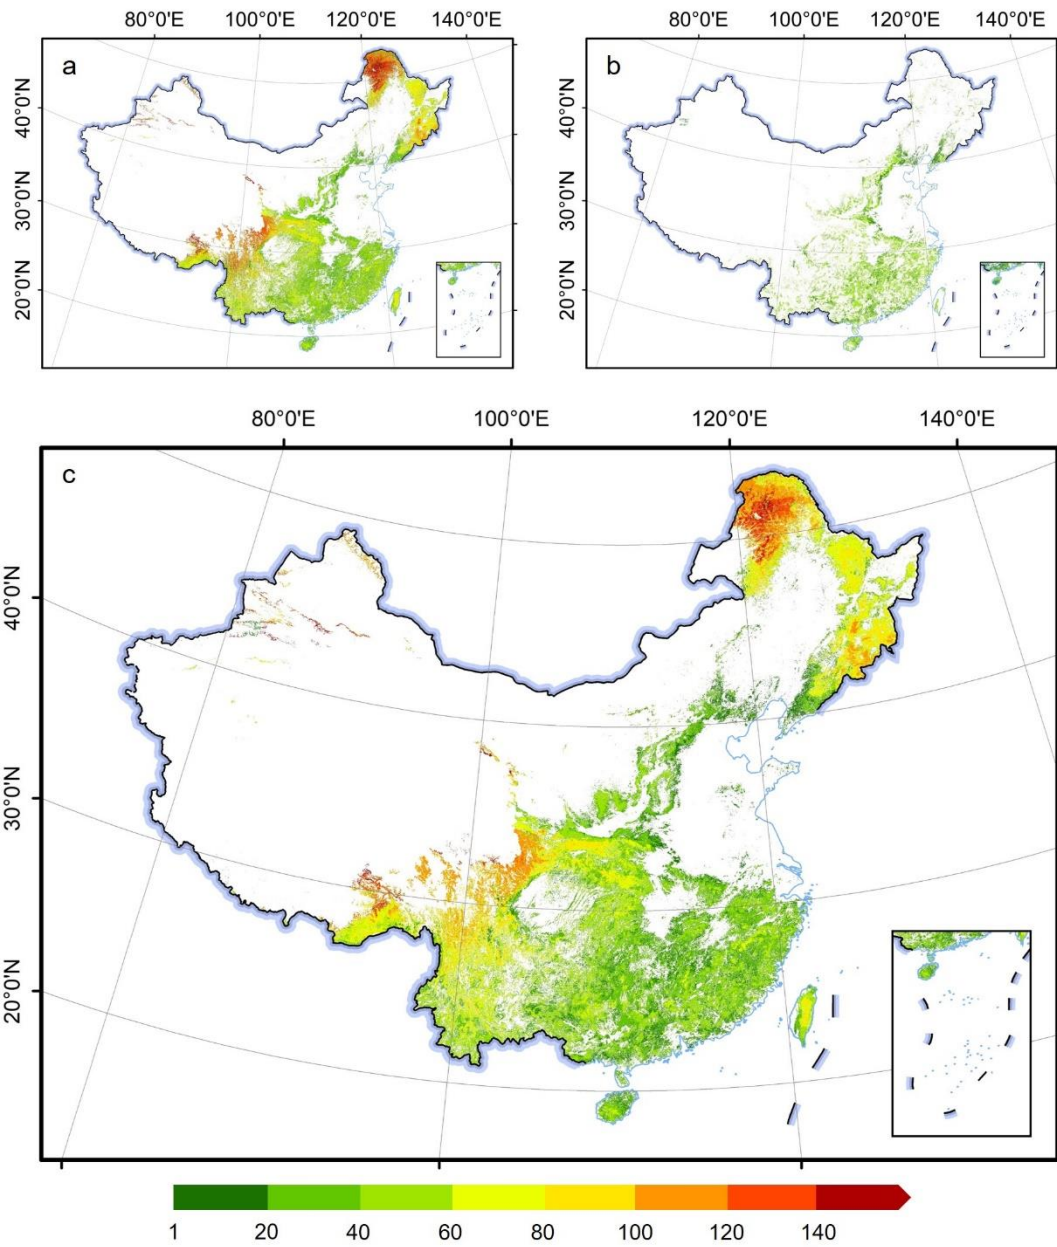

274

275

**Figure 4.** Forest age estimated from LandTrendr (a), MLA (b), and final China's forest age distribution (c) with 30 m resolution.

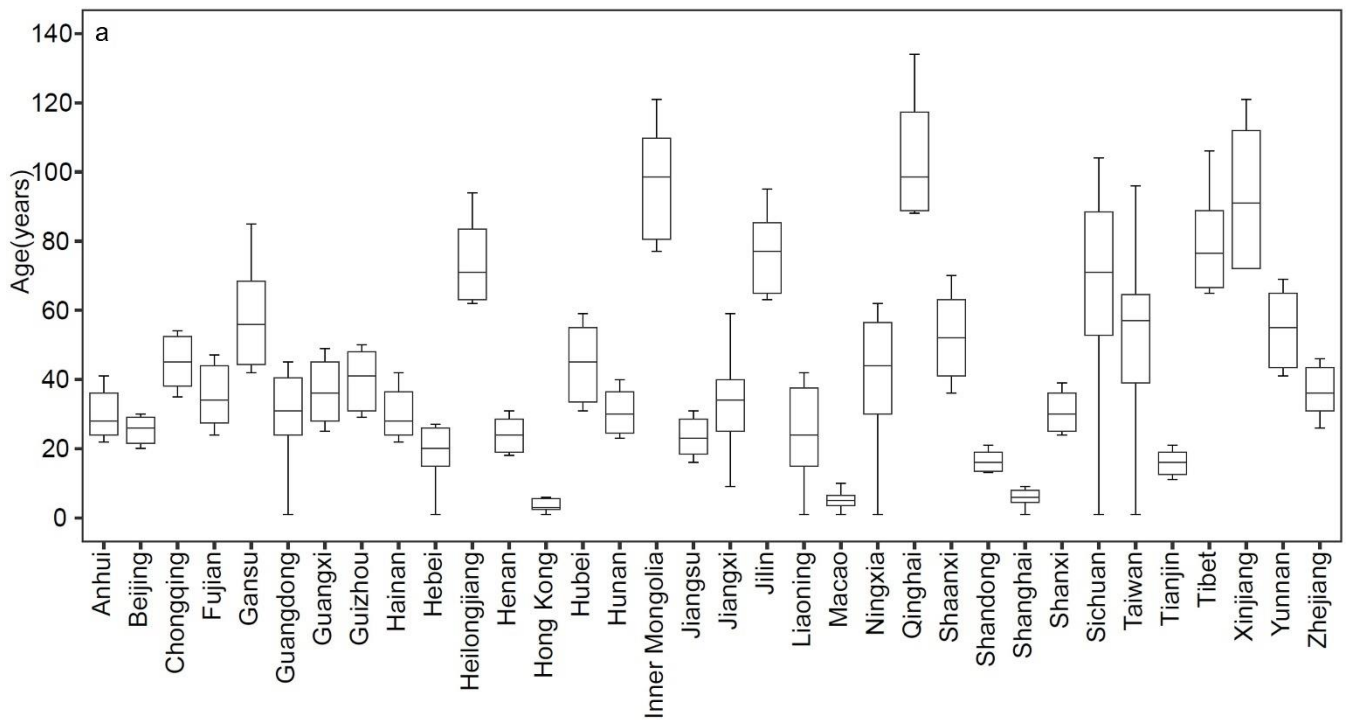

276

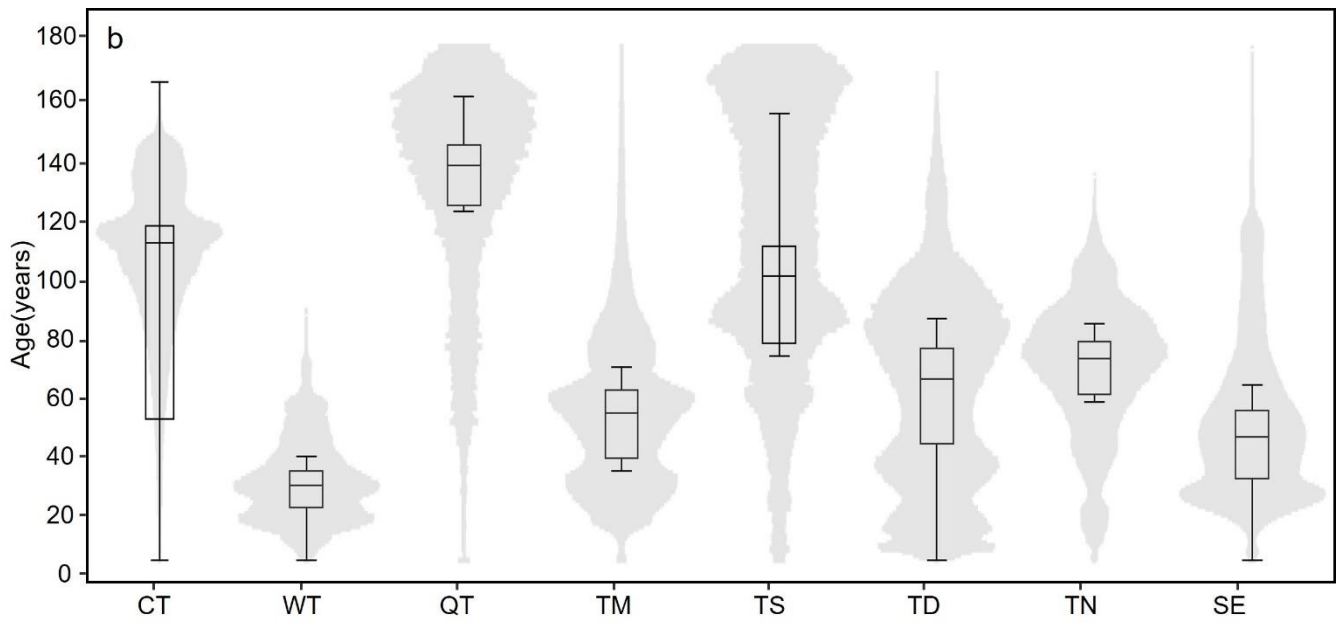

277

278

**Figure 5.** (a) Boxplot of China's forest age grouped by provinces (b) Violin plot of the forest age grouped by vegetation divisions.

### 279 3.3 Evaluation

#### 280 3.3.1 Comparison with field samples

281 We initially validated the forest age estimations by using forest inventory data. The forest inventory samples were acquired  
282 from 2003 to 2008. To align with the time frame of the forest age data obtained in this study, we shifted the predicted values  
283 corresponding to each sample forward by ~16 years. This strategy allows us to compare them with the inventory-measured  
284 forest ages. Figure 6a shows the comparison, which suggests that they have a significant linear relationship with  $R^2 = 0.51$   
285 (Figure 6a). We collected 99 field measurements of mean forest stand age after 2010 from published papers (Supplementary  
286 Table 8) and compared them with our estimated results. Figure 6b shows that the predicted forest ages also present a significant  
287 linear relationship with field measurements, with  $R^2 = 0.62$ .  
288

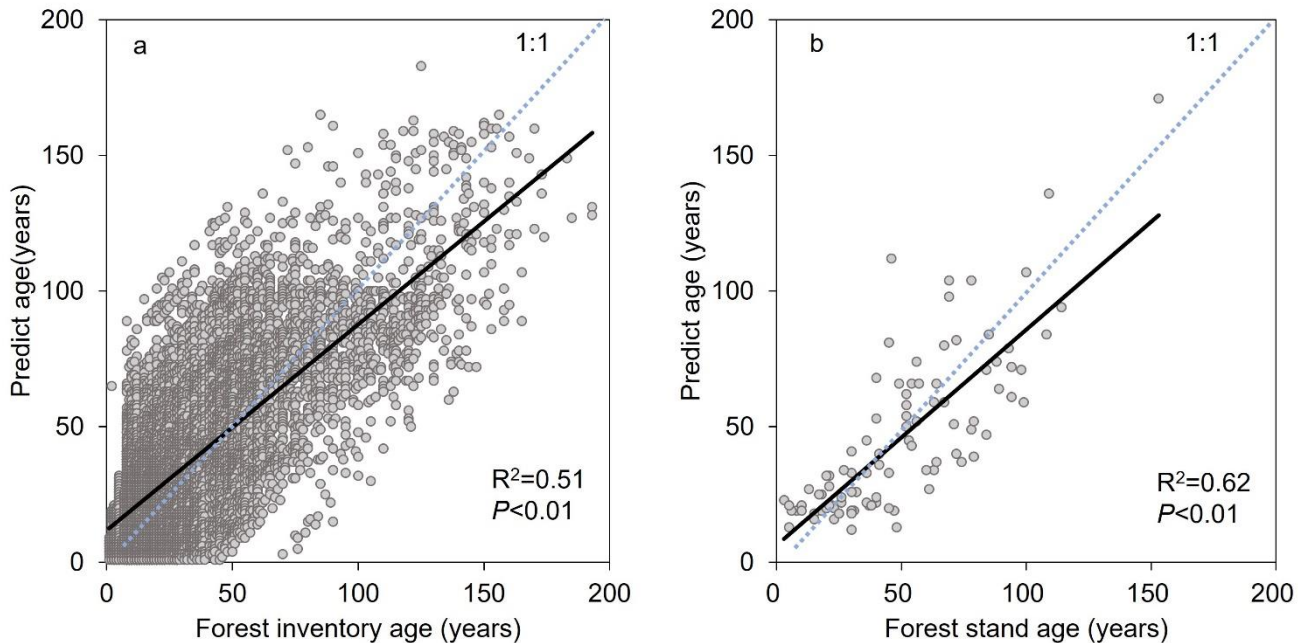

289

290 **Figure 6.** Scatter plots of (a) forest inventory age vs predicted forest age for this study and (b) field measurements of forest stand age  
291 collected from published papers vs predicted forest.

#### 292 3.3.2 Comparison with existing forest age map

293 Figure 7 shows the difference between our estimation and existing global forest age map, which suggests an average difference  
294 of 9.7 years. Our mapped forest age is older in northeast regions but younger forests in the middle regions than that from  
295 Besnard et al. (2021a) dataset. In addition, we gathered the existing forest age maps over China from published datasets and  
296 compared their average forest age with our estimation (Table 3). According to the available data, the average forest age in  
297 China ranged from 40 to 43 years between 2000 and 2013, corresponding to approximately 50 to 53 years in 2020. This aligns



298 closely with the average forest age of 56.1 years obtained in this study for the year of 2020, further underscoring the reliability  
 299 of the forest age mapped in this study.

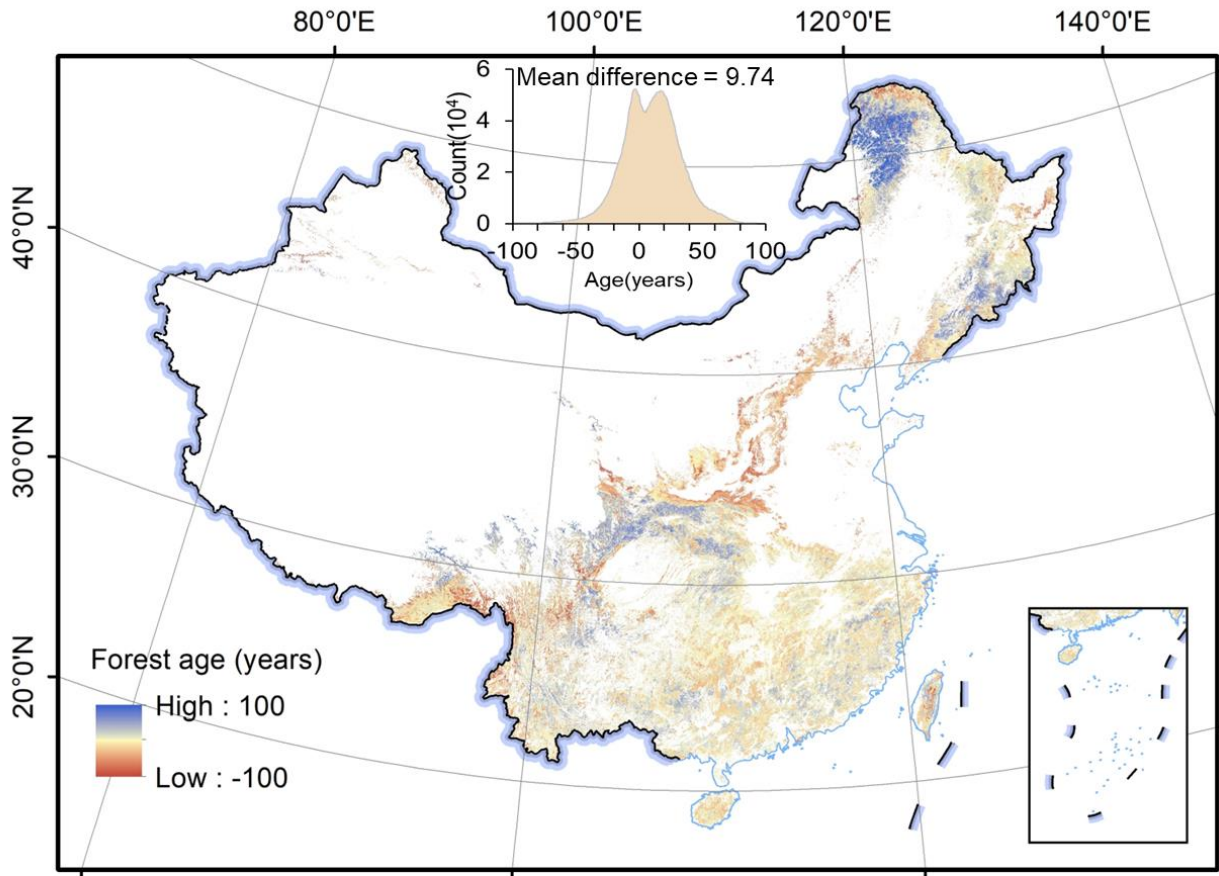

300  
 301 **Figure 7.** Comparison with global forest age product. The inset at the top left shows the frequency distribution of differences between the  
 302 global forest age map and our estimated forest age map.

303 **Table 3.** China's mean forest age collected from published papers.

| Source              | Mean forest age (years) | Resolution | Mapping year |
|---------------------|-------------------------|------------|--------------|
| Zhang et al. (2017) | 42.6                    | 1 km       | 2013         |
| Zhang et al. (2014) | 43                      | 1 km       | 2005         |
| Dai Ming (2011)     | 40.6                    | 8 km       | 1998         |
| Wang et al. (2007)  | <40                     | 1 km       | 2001         |
| Xia et al. (2023)   | 44.0                    | 1 km       | 2015         |
| This study          | 56.1                    | 30 m       | 2020         |

#### 304 **4 Discussion**

305 A high-spatial resolution forest age map is an important input for accurately quantifying forest carbon storage and potential.  
306 Although several forest age maps for China were generated in the most recent decades, their spatial resolution is coarser,  
307 ranging from 1 to 8 km (e.g., Zhang et al., 2014; Zhang et al., 2017), which does not satisfy the application requirements for  
308 local-to-regional scales (Xiao et al., 2023). Therefore, we generated a 30 m resolution forest age map of China using remote  
309 sensing and inventory data for 2020. Validation against independent forest inventory samples, field measurements collected  
310 from published papers, and existing forest age products indicate that the estimated forest age map has  $R^2$  of 0.51 to 0.62, and  
311 presented well spatial agreement with the existing forest age product. Such a high-resolution and timely forest age dataset is  
312 vital to assess ecological benefits of China's forests and to manage forest resources for sustainable development.

313

314 The generated forest age map indicates that 40.08% of forests are younger than 40 years, 38.11% are 41–80 years old, and  
315 21.81% are over 80 years old. This result indicates that most forests in China are young, which is consistent with the findings  
316 of Zhang et al. (2017) and Zhang et al. (2014), even though the specific proportions might vary slightly, which is mainly  
317 because they produced forest age distribution data for the year of 2005, whereas our data represents forest age in 2020.  
318 Furthermore, similar to Zhang et al. (2017) and Zhang et al. (2014), forests younger than 40 years are primarily in southern  
319 and eastern China, whereas forests older than 80 years are predominantly in northeastern and southwestern China (Figure 4).  
320 We further analyse the forest age by using China's planted and natural forest mask generated by Cheng et al. (2023a) for 2020.  
321 The results reveal that the average forest age for planted forests in China is 29.1 years with a standard deviation of 18.2 years,  
322 whereas natural forests have an average age of 69.7 years with a standard deviation of 30.6 years. This result aligns closely  
323 with the reported 16.5 years for China's planted forests in 2005 (which equates to approximately 31 years in 2020) by Yu et  
324 al. (2020).

325

326 This study combines two methods to estimate forest age across China. We first investigate in-depth the suitability of current  
327 mainstream MLAs for estimating forest age. For each vegetation division, we establish the optimal MLA and its optimal  
328 parameters (Table 2, **Supplementary Table 4**). Of the established MLAs, the ensemble learning approaches perform best for  
329 both training and evaluation compared with individual-based learners. Several previous studies support the idea that ensemble  
330 techniques have achieved better performance than that of its base learners (e. g. Rodriguez et al., 2006; Banfield et al., 2007;  
331 Canul-Reich et al., 2007; Rokach, 2009; De Stefano et al., 2011; Matloob et al., 2021). Bagging and boosting are two  
332 mainstream ensemble techniques in ensemble learning that combine multiple base models to improve predictive performance.  
333 Bagging reduces variance, whereas boosting reduces bias and improves overall model performance (Abbasi et al., 2022).  
334 However, most previous studies focus on bagging-based RF models to derive forest structure parameters in remote sensing  
335 fields (Simard et al., 2011; Cartus et al., 2012; Montesano et al., 2013; Matasci et al., 2018; Luther et al., 2019; Bolton et al.,  
336 2020). The present study highlights that ensemble learning algorithms based on boosting, including GBDT, LightGBM, and

337 CatBoost, demonstrate higher accuracy in estimating China's forest age compared to the bagging-based RF algorithm.  
338 Furthermore, within the current ensemble learning framework, the CatBoost algorithm based on boosting has a clear advantage  
339 for estimating forest age in China (Table 2). It produces optimal results in five vegetation zones and is as accurate as the best-  
340 performing algorithms in the remaining vegetation zones (Supplementary Table 5). Therefore, we recommend giving priority  
341 to the utilization of the CatBoost algorithm in deriving the forest structural parameters in China.

342

343 In the process of machine learning modelling for forest age estimation, we selected a total of 10 features, including canopy  
344 height, meteorological factors, soil factors, terrain factors, and human activities. Factor analysis indicates that canopy height  
345 has significantly influence forest age modelling, which is consistent with previous research, such as Zhang et al. (2017), who  
346 estimated forest age in China based on the relationship between canopy height and forest age. The main reason is that canopy  
347 height is typically correlated with the growth period (Sharma and Parton, 2007; Schumacher et al., 2020; Lin et al., 2023).  
348 Young trees usually have shorter canopy height and, and as trees age, canopy height gradually increases (Yu et al., 2020).  
349 Therefore, canopy height gives clues about tree age, and many age-estimation models are based on forest height (Lin et al.,  
350 2023). Terrain conditions also play important roles in all vegetation zones, especially the elevation and slope features (Figure  
351 2). This is mainly because terrain factors are closely related to vegetation distribution, growth conditions, and hydrological  
352 processes (Fernández-Martínez et al., 2014) and affecting forest age estimation (Lin et al., 2008). Climate factors, including  
353 temperature and precipitation, also play a significant role in estimating forest age and have been applied to estimate global  
354 forest age (Besnard et al., 2021). Climate elements are most pronounced in the SE and QT vegetation zones because these two  
355 zones belong to areas with extreme climates and pronounced seasonal variations (Zhang et al., 2018). The SE region has a  
356 warm and humid climate with abundant rainfall (Zhang et al., 2018), which aligns with seasonal growth, making it influential  
357 in forest age estimation. The QT region experiences extreme temperature fluctuations, with extremely cold winters and short  
358 and cool summers, significantly affecting tree growth rates and cycles (Zhang et al., 2021). Although soil and human activities  
359 seem to have a relatively smaller impact in this study, the high accuracy achieved in this study is attributed to the combined  
360 contributions of all factors.

361

362 The second method uses time-series remote sensing imagery and the LandTrendr algorithm to detect pixels that changed within  
363 the forest extent from 1985 to 2020. The forest age was estimated according the time since the last disturbance serving as a  
364 proxy for forest age. This approach has been extensively used to estimate forest age and is generally acknowledged to be  
365 accurate and reliable for detecting disturbance (Hermosilla et al., 2016). For instance, Du et al. (2022) used the LandTrendr  
366 algorithm to detect planting times of global planted forests, and Xiao et al. (2023) estimated the forest age of young forests in  
367 China since 1984 by using the CCDC time-series algorithm. These successful cases validate the feasibility of using time-series  
368 change-detection algorithms to estimate the age of disturbed forests. In this study, we compared our change-detection derived  
369 forest age with the age of young forests provided by Xiao et al. (2023) (Figure 8). These two outcomes have a mean difference  
370 of -3.79 years (Figure 8a) and have a significant linear relationship with  $R^2 = 0.53$  (Figure 8b).

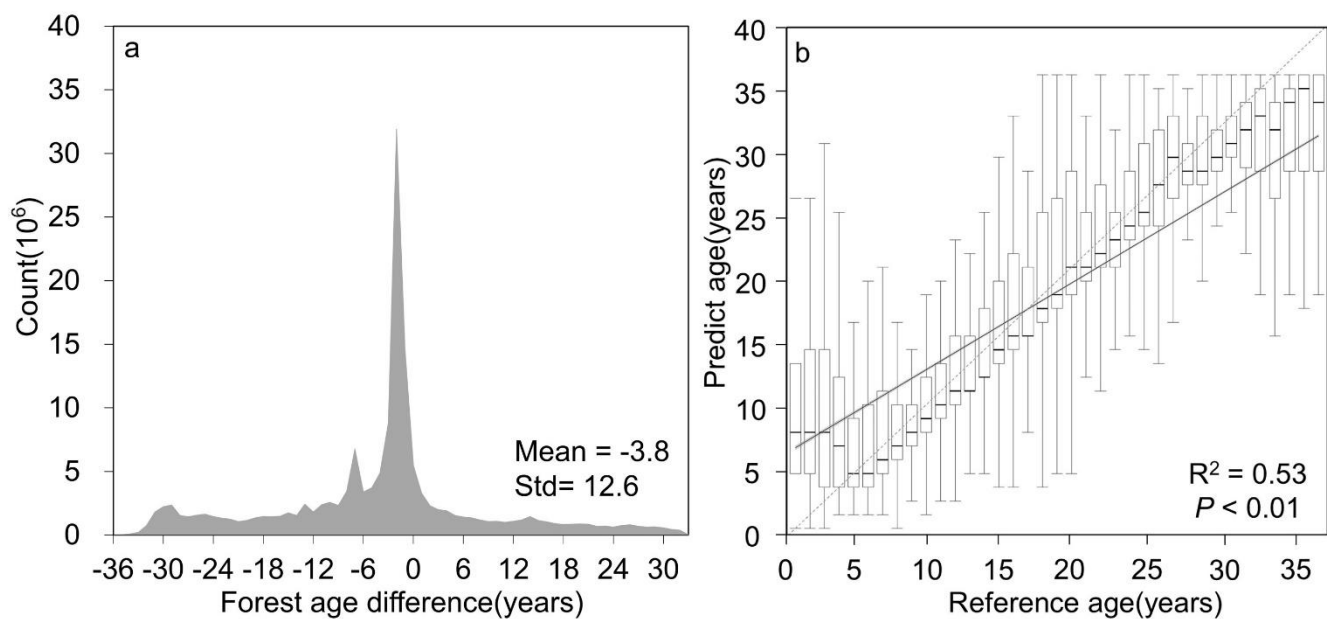

371

372 **Figure 8.** (a) Age difference and (b) linear relationship between estimated forest age and China's Young Forest Age dataset generated by  
 373 Xiao et al. (2023).

374

375 Overall, we produce a reliable forest age map for China. This forest age product has been validated by independent field  
 376 samples and compared against existing datasets with a  $R^2$  ranging from 0.51 to 0.62 (Figure 6). However, there is still a slight  
 377 overestimation of younger forest and an underestimation of older forest compared with validation samples, which is mainly  
 378 related to dataset and methods used in this study. In terms of dataset, primarily, the utilization of forest mask that delineate  
 379 planted and natural forests introduces an inescapable source of uncertainty, which is particularly high (approximately 10%) in  
 380 the southern regions of China (Cheng et al., 2023a). Furthermore, the dependence on canopy-height data generated by Liu et  
 381 al. (2022) as the crucial determinant in forest age estimation (Figure 2) necessitates meticulous consideration (Zhang et al.,  
 382 2017), giving the uncertainties in the canopy-height data ( $R^2=0.55$ ) could strongly affect the accuracy in forest age modelling.  
 383 Finally, when benchmarked against extant products, conspicuous disparities in forest age estimates appear within the  
 384 northeastern and southwestern regions (Figure 7). These disparities, coupled with insights from forest inventory data, highlight  
 385 the prevalence of older forests (exceeding 100 years) within these regions (Figures 4). The unique challenge posed by  
 386 estimating the age of such older forests, characterized by sluggish growth rates (Maltman et al., 2023), accentuates the  
 387 sensitivity to crown height data. Consequently, the uncertainty associated with canopy height data is conspicuously accentuated  
 388 in these regions. Regarding to methods, we combined MLA and disturbance detection approach to derive forest age, for MLA,  
 389 overfitting is a common challenge, where a model learns the training data too well and fails to generalize to unseen data (Belgiu  
 390 and Drăguț 2016). The results presented in Supplementary Table 5 suggest that the constructed forest age models exhibit a  
 391 certain degree of overfitting, which can cause some errors for forest age estimation. Addressing the issue of overfitting, data

392 augmentation and exploring new deep learning algorithms may be promising directions for further investigation. For  
393 LandTrendr approach, it is affected by different parameters such as input bands, vegetation parameters (NBR index), climates,  
394 vegetation, terrain and atmospheric conditions (Banskota et al. 2014; Hermosilla et al, 2015; Hua et al, 2021; Huang et al,  
395 2023; Yang et al, 2018). China's unprecedented development has led to extensive land cover changes, making it one of the  
396 most intensively managed forest regions globally (Tong et al., 2020). This has resulted in significant forest fragmentation,  
397 posing challenges in using NBR and other indices for change detection (Li et al 2024), and creating uncertainty in forest age  
398 identification. Furthermore, while the LandTrendr algorithm effectively captures sharp disturbances like fires, clearcutting,  
399 and reforestation, it falls short in detecting subtle changes such as silviculture and thinning (Huang et al. 2023; Zhu 2017),  
400 This limitation may lead to the omission of young trees and an overestimation of forest age.

## 401 **5 Data availability**

402 The 30 m resolution forest age map of China generated by this study is openly available at  
403 <https://doi.org/10.5281/zenodo.8354262> (Cheng et al., 2023b). Please contact the authors for more detailed information

## 404 **6 Conclusion**

405 High-resolution and spatially explicit forest age mapping for China play a crucial role in accurately quantifying the current  
406 carbon sequestration of forest ecosystems and its potential in the future. Currently, publicly available China's forest age data  
407 suffer from low resolution and incomplete coverage of age ranges, making it difficult to meet the requirements of studies at  
408 various spatial scales. Therefore, this study combines time-series analysis of remote sensing imagery with MLAs to create the  
409 first 30 m resolution China's forest age map for the year of 2020. Validation against forest inventory data, field measurements,  
410 and existing products demonstrates the  $R^2$  values between 0.51 and 0.62. The estimated forest age data reveal an average forest  
411 age of 56.1 years for China, with a standard deviation of 32.7 years. This dataset holds significant importance for understanding  
412 the carbon source and sink dynamics in China's forest ecosystem.

413

## 414 **Author contributions**

415 KC, YC and QG designed the research. KC, YC, TX performed the analysis, KC and YC wrote the paper. QG, HY, and QM  
416 supervised and reviewed the paper. HG and YR reviewed the manuscript. QG, KC, YC, WL collected the field measurements  
417 and existing remote sensing products. KC and YC contributed equally to this work.

## 418 **Competing interests**

419 The contact author has declared that none of the authors has any competing interests.

## 420 **Acknowledgements**

421 We would like to thank the editor and the reviewers for their valuable comments.

422

## 423 **Financial support**

424 This research has been supported by the National Key Research and Development Program of China (grant no.  
425 2022YFF130203), the International Research Center of Big Data for Sustainable Development Goals (grant no.  
426 CBAS2022GSP06), the National Natural Science Foundation of China (grant no. 42371329 and 31971575).

## 427 **References**

- 428 Abbasi, E., M. R. Alavi Moghaddam, and E. Kowsari. A systematic and critical review on development of machine learning  
429 based-ensemble models for prediction of adsorption process efficiency. *J. Clean. Prod.*, 379:134588,  
430 <https://doi.org/10.1016/j.jclepro.2022.134588>, 2022
- 431 Akiba, T., S. Sano, T. Yanase, T. Ohta, and M. Koyama. Optuna: A Next-generation Hyperparameter Optimization Framework.  
432 Pages 2623–2631 Proceedings of the 25th ACM SIGKDD International Conference on Knowledge Discovery & Data  
433 Mining. Association for Computing Machinery, Anchorage, AK, USA. <https://doi.org/10.48550/arXiv.1907.10902>, 2019.
- 434 Alerskans, E., A.-S. P. Zinck, P. Nielsen-Englyst, and J. L. Høyer. Exploring machine learning techniques to retrieve sea  
435 surface temperatures from passive microwave measurements. *Remote Sens Environ.*, 281:113220,  
436 <https://doi.org/10.1016/j.rse.2022.113220>, 2022.
- 437 Banfield, R. E., L. O. Hall, K. W. Bowyer, and W. P. Kegelmeyer. A Comparison of Decision Tree Ensemble Creation  
438 Techniques. *IEEE Trans. Pattern Anal. Mach. Intell.*, 29:173-180, <https://doi.org/10.1109/TPAMI.2007.250609>, 2007.
- 439 Banskota, A., Kayastha, N., Falkowski, M. J., Wulder, M. A., Froese, R. E., and White, J. C. Forest Monitoring Using Landsat  
440 Time Series Data: A Review. *Can. J. Remote. Sens.*, 40(5), 362–384. <https://doi.org/10.1080/07038992.2014.987376>,  
441 2014.
- 442 Belgiu, M., and Drăguț, L. Random forest in remote sensing: A review of applications and future directions. *ISPRS J.*  
443 *Photogramm. Remote Sens.*, 114, 24-31. <https://doi.org/10.1016/j.isprsjprs.2016.01.011>, 2016.
- 444 Besnard, S., S. Koirala, M. Santoro, U. Weber, J. Nelson, J. Gutter, B. Herault, J. Kassi, A. N’Guessan, C. Neigh, B. Poulter,  
445 T. Zhang, and N. Carvalhais. Mapping global forest age from forest inventories, biomass and climate data. *Earth Syst.*  
446 *Sci. Data.*, 13:4881-4896, <https://doi.org/10.5194/essd-13-4881-2021>, 2021.
- 447 Bolton, D. K., P. Tompalski, N. C. Coops, J. C. White, M. A. Wulder, T. Hermosilla, M. Queinnec, J. E. Luther, O. R. van  
448 Lier, R. A. Fournier, M. Woods, P. M. Treitz, K. Y. van Ewijk, G. Graham, and L. Quist. Optimizing Landsat time series

449 length for regional mapping of lidar-derived forest structure. *Remote Sens Environ.*, 239:111645,  
450 <https://doi.org/10.1016/j.rse.2020.111645>, 2020.

451 Breiman, L. Random Forests. *Machine Learning* 45:5-32, <https://doi.org/10.1023/A:1010933404324>, 2001.

452 Canul-Reich, J., L. Shoemaker, and L. O. Hall. Ensembles of Fuzzy Classifiers. Pages 1-6 in 2007 IEEE International Fuzzy  
453 Systems Conference. <https://doi.org/10.1109/FUZZY.2007.4295345>, 2007.

454 Cartus, O., J. Kellndorfer, M. Rombach, and W. Walker. Mapping Canopy Height and Growing Stock Volume Using Airborne  
455 Lidar, ALOS PALSAR and Landsat ETM+. *Remote Sens.*, 4:3320-3345, <https://doi.org/10.3390/rs4113320>, 2012.

456 Cheng, K, Y, Chen, T, Xiang, H, Yang, W, Liu, Y, Ren, H, Guan, T, Hu, Q, Ma, and Qinghua Guo. 2020 forest age map for  
457 China with 30 m resolution (1.0) [Data set]. Zenodo. <https://doi.org/10.5281/zenodo.8354262>, 2023b.

458 Cheng, K., Y. Su, H. Guan, S. Tao, Y. Ren, T. Hu, K. Ma, Y. Tang, and Q. Guo. Mapping China's planted forests using high  
459 resolution imagery and massive amounts of crowdsourced samples. *ISPRS J. Photogramm. Remote Sens.*, 196:356-371,  
460 <https://doi.org/10.1016/j.isprsjprs.2023.01.005>, 2023a.

461 Chen, Dong, Tatiana V. Loboda, Alexander Krylov, and Peter V. Potapov. Mapping stand age dynamics of the Siberian larch  
462 forests from recent Landsat observations, *Remote Sensing of Environment*, 187: 320-31.  
463 <https://doi.org/10.1016/j.rse.2016.10.033>, 2016.

464 Dai, M., T. Zhou, L. Yang, and G. Jia. Spatial pattern of forest ages in China retrieved from national-level inventory and  
465 remote sensing imageries. *GEOGRAPHICAL RESEARCH* 30:172-184, <https://doi.org/10.11821/yj2011010017>, 2011  
466 (in Chinese).

467 de Jong, S.M., Shen, Y., de Vries, J., Bijnaar, G., van Maanen, B., Augustinus, P., and Verweij, P. Mapping mangrove  
468 dynamics and colonization patterns at the Suriname coast using historic satellite data and the LandTrendr algorithm. *Int.*  
469 *J. Appl. Earth Obs. Geoinformation.*, 97, 102293. <https://doi.org/10.1016/j.jag.2020.102293>, 2021.

470 De Stefano, C., F. Fontanella, G. Folino, and A. S. di Freca. A Bayesian Approach for Combining Ensembles of GP Classifiers.  
471 Pages 26-35. Springer Berlin Heidelberg, Berlin, Heidelberg. [https://doi.org/10.1007/978-3-642-21557-5\\_5](https://doi.org/10.1007/978-3-642-21557-5_5), 2011.

472 Du, Z., L. Yu, J. Yang, D. Coomes, K. Kanniah, H. Fu, and P. Gong. Mapping Annual Global Forest Gain From 1983 to 2021  
473 With Landsat Imagery. *IEEE J-STARS.*, 16:4195-4204, <https://doi.org/10.1109/JSTARS.2023.3267796>, 2023.

474 Du, Z., L. Yu, J. Yang, Y. Xu, B. Chen, S. Peng, T. Zhang, H. Fu, N. Harris, and P. Gong. A global map of planting years of  
475 plantations. *Scientific Data.*, 9:141, <https://doi.org/10.1038/s41597-022-01260-2>, 2022.

476 Dutta, K. K., S. S. A, A. Victor, A. G. Nathu, M. A. Habib, and D. Parashar. Kannada Alphabets Recognition using Decision  
477 Tree and Random Forest Models. Pages 534-541 in 2020 3rd International Conference on Intelligent Sustainable Systems  
478 (ICISS). <https://doi.org/10.1109/ICISS49785.2020.9315972>, 2020.

479 Fernández-Martínez, M., S. Vicca, I. A. Janssens, S. Luysaert, M. Campioli, J. Sardans, M. Estiarte, and J. Peñuelas. Spatial  
480 variability and controls over biomass stocks, carbon fluxes, and resource-use efficiencies across forest ecosystems. *Trees.*  
481 28:597-611, <https://doi.org/10.1007/s00468-013-0975-9>, 2014.



482 Guo, Y., Y. Zhou, X. Hu, and W. Cheng. Research on Recommendation of Insurance Products Based on Random Forest.  
483 Pages 308-311 in 2019 International Conference on Machine Learning, Big Data and Business Intelligence (MLBDBI).  
484 <https://doi.org/10.1109/MLBDBI48998.2019.00069>, 2019.

485 Hermosilla, T., M. A. Wulder, J. C. White, N. C. Coops, G. W. Hobart, and L. B. Campbell. Mass data processing of time  
486 series Landsat imagery: pixels to data products for forest monitoring. *Int J Digit Earth.*, 9:1035-1054,  
487 <https://doi.org/10.1080/17538947.2016.1187673>, 2016.

488 Hermosilla, T., Wulder, M. A., White, J. C., Coops, N. C., and Hobart, G. W. Regional detection, characterization, and  
489 attribution of annual forest change from 1984 to 2012 using Landsat-derived time-series metrics. *Remote Sens Environ.*,  
490 170, 121–132. <https://doi.org/10.1016/j.rse.2015.09.004>, 2015.

491 Hua, J., Chen, G., Yu, L., Ye, Q., Jiao, H., and Luo, X. Improved Mapping of Long-Term Forest Disturbance and Recovery  
492 Dynamics in the Subtropical China Using All Available Landsat Time-Series Imagery on Google Earth Engine Platform.  
493 *IEEE J-STARS.*, 14, 2754–2768. <https://doi.org/10.1109/JSTARS.2021.3058421>, 2021.

494 Huang, C., Goward, S.N., Masek, J.G., Thomas, N., Zhu, Z., and Vogelmann, J.E. An automated approach for reconstructing  
495 recent forest disturbance history using dense Landsat time series stacks. *Remote Sens Environ.*, 114, 183-198.  
496 <https://doi.org/10.1016/j.rse.2009.08.017>, 2010.

497 Huang, Z., Li, X., Du, H., Zou, W., Zhou, G., Mao, F., Fan, W., Xu, Y., Ni, C., Zhang, B., Chen, Q., Chen, J., and Hu, M. An  
498 Algorithm of Forest Age Estimation Based on the Forest Disturbance and Recovery Detection. *IEEE Trans Geosci*  
499 *Remote Sens.*, 61, 1-18. <https://doi.org/10.1109/TGRS.2023.3322163>, 2023.

500 Jerome, H. F. Greedy function approximation: A gradient boosting machine. *Ann Stat.*, 29:1189-1232,  
501 <https://doi.org/10.1214/aos/1013203451>, 2001.

502 Kennedy, R. E., Z. Yang, N. Gorelick, J. Braaten, L. Cavalcante, W. B. Cohen, and S. Healey. Implementation of the  
503 LandTrendr Algorithm on Google Earth Engine. *Remote Sens.*, 10:691, <https://doi.org/10.3390/rs10050691>, 2018.

504 Kennedy, R.E., Yang, Z., and Cohen, W.B. Detecting trends in forest disturbance and recovery using yearly Landsat time  
505 series: 1. LandTrendr — Temporal segmentation algorithms. *Remote Sens Environ.*, 114, 2897-2910.  
506 <https://doi.org/10.1016/j.rse.2010.07.010>, 2010.

507 Kim, Hyunglok, Wade Crow, Xiaojun Li, Wolfgang Wagner, Sebastian Hahn, and Venkataraman Lakshmi. True global error  
508 maps for SMAP, SMOS, and ASCAT soil moisture data based on machine learning and triple collocation analysis.  
509 *Remote Sens Environ.*, 298: 113776, <https://doi.org/10.1016/j.rse.2023.113776>, 2023.

510 Lavanya, K., S. Bajaj, P. Tank, and S. Jain. Handwritten digit recognition using hoeffding tree, decision tree and random  
511 forests — A comparative approach. Pages 1-6 in 2017 International Conference on Computational Intelligence in Data  
512 Science (ICCIDS). <https://doi.org/10.1109/ICCIDS.2017.8272641>, 2017.

513 Li, P., Li, H., Si, B., Zhou, T., Zhang, C., and Li, M. Mapping planted forest age using LandTrendr algorithm and Landsat 5–  
514 8 on the Loess Plateau, China. *Agric For Meteorol*, 344, 109795. <https://doi.org/10.1016/j.agrformet.2023.109795>, 2024.



515 Lin, G., B. Xia, Z. Zeng, and W. Huang. The Relationship between NDVI, Stand Age and Terrain Factors of *Pinus elliottii*  
516 Forest. Pages 232-236 in 2008 International Workshop on Education Technology and Training & 2008 International  
517 Workshop on Geoscience and Remote Sensing. <https://doi.org/10.1109/ETTandGRS.2008.302>, 2008.

518 Lin, X., R. Shang, J. M. Chen, G. Zhao, X. Zhang, Y. Huang, G. Yu, N. He, L. Xu, and W. Jiao. High-resolution forest age  
519 mapping based on forest height maps derived from GEDI and ICESat-2 space-borne lidar data. *Agric For Meteorol.*,  
520 339:109592, <https://doi.org/10.1016/j.agrformet.2023.109592>, 2023.

521 Liu, X., Y. Su, T. Hu, Q. Yang, B. Liu, Y. Deng, H. Tang, Z. Tang, J. Fang, and Q. Guo. Neural network guided interpolation  
522 for mapping canopy height of China's forests by integrating GEDI and ICESat-2 data. *Remote Sens Environ.*, 269,  
523 <https://doi.org/10.1016/j.rse.2021.112844>, 2022.

524 Lundberg, S. and Lee, S.-I. A Unified Approach to Interpreting Model Predictions, arXiv [preprint], arXiv:1705.07874,  
525 <https://doi.org/10.48550/arXiv.1705.07874>, 2017.

526 Lundberg, S. M., Erion, G. G., and Lee, S.-I. Consistent Individualized Feature Attribution for Tree Ensembles, arXiv  
527 [preprint], arXiv:1802.03888, <https://doi.org/10.48550/arXiv.1802.03888>, 2019

528 Luther, J. E., R. A. Fournier, O. R. van Lier, and M. Bujold. Extending ALS-Based Mapping of Forest Attributes with Medium  
529 Resolution Satellite and Environmental Data. *Remote Sens.*, 11:1092, <https://doi.org/10.3390/rs11091092>, 2019.

530 Maltamo, M., H. Kinnunen, A. Kangas, and L. Korhonen. Predicting stand age in managed forests using National Forest  
531 Inventory field data and airborne laser scanning. *For. Ecosyst.*, 7:44, <https://doi.org/10.1186/s40663-020-00254-z>, 2020.

532 Maltman, J. C., T. Hermosilla, M. A. Wulder, N. C. Coops, and J. C. White. Estimating and mapping forest age across Canada's  
533 forested ecosystems. *Remote Sens Environ.*, 290:113529, <https://doi.org/10.1016/j.rse.2023.113529>, 2023.

534 Matasci, G., T. Hermosilla, M. A. Wulder, J. C. White, N. C. Coops, G. W. Hobart, and H. S. J. Zald. Large-area mapping of  
535 Canadian boreal forest cover, height, biomass and other structural attributes using Landsat composites and lidar plots.  
536 *Remote Sens Environ.*, 209:90-106, <https://doi.org/10.1016/j.rse.2017.12.020>, 2018.

537 Matloob, F., T. M. Ghazal, N. Taleb, S. Aftab, M. Ahmad, M. A. Khan, S. Abbas, and T. R. Soomro. Software Defect  
538 Prediction Using Ensemble Learning: A Systematic Literature Review. *IEEE Access*, 9:98754-98771,  
539 <https://doi.org/10.1109/ACCESS.2021.3095559>, 2021.

540 Mekruksavanich, S., P. Jantawong, N. Hnoohom, and A. Jitpattanukul. Hyperparameter Tuning in Convolutional Neural  
541 Network for Face Touching Activity Recognition using Accelerometer Data. Pages 101-105 in 2022 Research, Invention,  
542 and Innovation Congress: Innovative Electricals and Electronics (RI2C).  
543 <https://doi.org/10.1109/RI2C56397.2022.9910262>, 2022.

544 Montesano, P. M., B. D. Cook, G. Sun, M. Simard, R. F. Nelson, K. J. Ranson, Z. Zhang, and S. Luthcke. Achieving accuracy  
545 requirements for forest biomass mapping: A spaceborne data fusion method for estimating forest biomass and LiDAR  
546 sampling error. *Remote Sens Environ.*, 130:153-170, <https://doi.org/10.1016/j.rse.2012.11.016>, 2013.

547 Niu, Y., V. Squires, and A. Jentsch. Risks of China's increased forest area. *Science*, 379:447-448,  
548 <https://doi.org/10.1126/science.adg0210>, 2023.

- 549 Pan, Y., R. A. Birdsey, J. Fang, R. Houghton, P. E. Kauppi, W. A. Kurz, O. L. Phillips, A. Shvidenko, S. L. Lewis, J. G.  
550 Canadell, P. Ciais, R. B. Jackson, S. W. Pacala, A. D. McGuire, S. Piao, A. Rautiainen, S. Sitch, and D. Hayes. A Large  
551 and Persistent Carbon Sink in the World. *Forests. Science*, 333:988-993, <https://doi.org/10.1126/science.1201609>, 2011.
- 552 Piao, S., Y. He, X. Wang, and F. Chen. Estimation of China's terrestrial ecosystem carbon sink: Methods, progress and  
553 prospects. *Sci. China Earth Sci.*, 65:641 – 651, <https://doi.org/10.1007/s11430-021-9892-6>, 2022.
- 554 Ren, Y., Wei, X., Zhang, L., Cui, S., Chen, F., Xiong, Y., & Xie, P. Potential for forest vegetation carbon storage in Fujian  
555 Province, China, determined from forest inventories. *Plant Soil.*, 345, 125-140, [https://doi.org/10.1007/s11104-011-0766-](https://doi.org/10.1007/s11104-011-0766-2)  
556 2, 2011.
- 557 Rodman, K.C., Andrus, R.A., Veblen, T.T., and Hart, S.J. Disturbance detection in landsat time series is influenced by tree  
558 mortality agent and severity, not by prior disturbance. *Remote Sens Environ.*, 254, 112244.  
559 <https://doi.org/10.1016/j.rse.2020.112244>, 2021.
- 560 Rodriguez, J. J., L. I. Kuncheva, and C. J. Alonso. Rotation Forest: A New Classifier Ensemble Method. *IEEE Trans. Pattern*  
561 *Anal. Mach. Intell.*, 28:1619-1630, <https://doi.org/10.1109/TPAMI.2006.211>, 2006.
- 562 Rokach, L. Taxonomy for characterizing ensemble methods in classification tasks: A review and annotated bibliography.  
563 *Computational Statistics & Data Analysis*, 53:4046-4072, <https://doi.org/10.1016/j.csda.2009.07.017>, 2009.
- 564 Sandha, S. S., M. Aggarwal, I. Fedorov, and M. Srivastava. Mango: A Python Library for Parallel Hyperparameter Tuning.  
565 Pages 3987-3991 in ICASSP 2020 - 2020 IEEE International Conference on Acoustics, Speech and Signal Processing  
566 (ICASSP), <https://doi.org/10.1109/ICASSP40776.2020.9054609>, 2020.
- 567 Schumacher, J., M. Hauglin, R. Astrup, and J. Breidenbach. Mapping forest age using National Forest Inventory, airborne  
568 laser scanning, and Sentinel-2 data. *For. Ecosyst.*, 7:60, <https://doi.org/10.1186/s40663-020-00274-9>, 2020.
- 569 Sharma, M., and J. Parton. Height–diameter equations for boreal tree species in Ontario using a mixed-effects modelling  
570 approach. *For. Ecol. Manag.*, 249:187-198, <https://doi.org/10.1016/j.foreco.2007.05.006>, 2007.
- 571 Simard, M., N. Pinto, J. B. Fisher, and A. Baccini. Mapping forest canopy height globally with spaceborne lidar. *J. Geophys.*  
572 *Res. Biogeosci.*, 116, <https://doi.org/10.1029/2011JG001708>, 2011.
- 573 Su, Y., Q. Guo, T. Hu, H. Guan, S. Jin, S. An, X. Chen, K. Guo, Z. Hao, Y. Hu, Y. Huang, M. Jiang, J. Li, Z. Li, X. Li, X. Li,  
574 C. Liang, R. Liu, Q. Liu, H. Ni, S. Peng, Z. Shen, Z. Tang, X. Tian, X. Wang, R. Wang, Z. Xie, Y. Xie, X. Xu, X. Yang,  
575 Y. Yang, L. Yu, M. Yue, F. Zhang, and K. Ma. An updated Vegetation Map of China (1:1000000). *Sci. Bull.*, 65:1125-  
576 1136, <https://doi.org/10.1016/j.scib.2020.04.004>, 2020.
- 577 Sun, Bochao, Wenjun Cui, Gaoyang Liu, Biao Zhou, and Weijian Zhao. A hybrid strategy of AutoML and SHAP for automated  
578 and explainable concrete strength prediction. *Case Stud. Constr. Mater.*, 19: e02405,  
579 <https://doi.org/10.1016/j.cscm.2023.e02405>, 2023.
- 580 Tesfagergish, S. G., J. Kapočičūtė-Dzikienė, and R. Damaševičius. Zero-Shot Emotion Detection for Semi-Supervised  
581 Sentiment Analysis Using Sentence Transformers and Ensemble Learning. *Appl. Sci.*, 12(17), 8662,  
582 <https://doi.org/10.3390/app12178662>, 2022.

583 Tian, L., L. Liao, Y. Tao, X. Wu, and M. Li. Forest Age Mapping Using Landsat Time-Series Stacks Data Based on Forest  
584 Disturbance and Empirical Relationships between Age and Height. *Remote Sens.*, 15:2862,  
585 <https://doi.org/10.3390/rs15112862>, 2023.

586 Tong, X., M. Brandt, Y. Yue, P. Ciais, M. Rudbeck Jepsen, J. Penuelas, J.-P. Wigneron, X. Xiao, X.-P. Song, S. Horion, K.  
587 Rasmussen, S. Saatchi, L. Fan, K. Wang, B. Zhang, Z. Chen, Y. Wang, X. Li, and R. Fensholt. Forest management in  
588 southern China generates short term extensive carbon sequestration. *Nat. Commun.*, 11, [https://doi.org/10.1038/s41467-](https://doi.org/10.1038/s41467-019-13798-8)  
589 019-13798-8, 2020.

590 Tubiello, F. N., G. Conchedda, L. Casse, P. Hao, G. De Santis, and Z. Chen. A new cropland area database by country circa  
591 2020. *Earth Syst. Sci. Data Discuss.*, 2023:1-33, <https://doi.org/10.5194/essd-2023-211>, 2023.

592 Verbesselt, J., Hyndman, R., Newnham, G., and Culvenor, D. Detecting trend and seasonal changes in satellite image time  
593 series. *Remote Sens Environ.*, 114, 106-115. <https://doi.org/10.1016/j.rse.2009.08.014>, 2010a.

594 Verbesselt, J., Hyndman, R., Zeileis, A., and Culvenor, D. Phenological change detection while accounting for abrupt and  
595 gradual trends in satellite image time series. *Remote Sens Environ.*, 114, 2970-2980.  
596 <https://doi.org/10.1016/j.rse.2010.08.003>, 2010b.

597 Wang, S., J. M. Chen, W. M. Ju, X. Feng, M. Chen, P. Chen, and G. Yu. Carbon sinks and sources in China's forests during  
598 1901–2001. *J. Environ. Manage.*, 85:524-537, <https://doi.org/10.1016/j.jenvman.2006.09.019>, 2007.

599 Wang, Y., X. Wang, K. Wang, F. Chevallier, D. Zhu, J. Lian, Y. He, H. Tian, J. Li, J. Zhu, S. Jeong, and J. G. Canadell. The  
600 size of the land carbon sink in China. *Nature*, 603:E7-E9, <https://doi.org/10.1038/s41586-021-04255-y>, 2022.

601 Wei, Z., Y. Meng, W. Zhang, J. Peng, and L. Meng. Downscaling SMAP soil moisture estimation with gradient boosting  
602 decision tree regression over the Tibetan Plateau. *Remote Sens Environ.*, 225:30-44,  
603 <https://doi.org/10.1016/j.rse.2019.02.022>, 2019.

604 Xia, J., X. Xia, Y. Chen, R. Shen, Z. Zhang, B. Liang, J. Wang, and W. Yuan. Reconstructing Long-Term Forest Age of China  
605 by Combining Forest Inventories, Satellite-Based Forest Age and Forest Cover Data Sets. *J. Geophys. Res. Biogeosci.*,  
606 128: e2023JG007492, <https://doi.org/10.1029/2023JG007492>, 2023.

607 Xiao, Y., Q. Wang, X. Tong, and P. M. Atkinson. Thirty-meter map of young forest age in China. *Earth Syst. Sci. Data.*,  
608 15:3365-3386, <https://doi.org/10.5194/essd-15-3365-2023>, 2023.

609 Yang, Y., Erskine, P. D., Lechner, A. M., Mulligan, D., Zhang, S., and Wang, Z. Detecting the dynamics of vegetation  
610 disturbance and recovery in surface mining area via Landsat imagery and LandTrendr algorithm. *J. Clean. Prod.*, 178,  
611 353–362. <https://doi.org/10.1016/j.jclepro.2018.01.050>, 2018.

612 Yu, Z., H. R. Zhao, S. R. Liu, G. Y. Zhou, J. Y. Fang, G. R. Yu, X. L. Tang, W. T. Wang, J. H. Yan, G. X. Wang, K. P. Ma,  
613 S. G. Li, S. Du, S. J. Han, Y. X. Ma, D. Q. Zhang, J. X. Liu, S. Z. Liu, G. W. Chu, Q. M. Zhang, and Y. L. Li. Mapping  
614 forest type and age in China's plantations. *Sci. Total Environ.*, 744. <https://doi.org/10.1016/j.scitotenv.2020.140790>, 2020.

615 Zhang H, J. Y. , Shen X, Li G, and Z. D. Rising Air Temperature and Its Asymmetry Under Different Vegetation Regions in  
616 China. *Sci. Geol. Sin.*, 38 (2): 272-283, <https://doi.org/10.13249/j.cnki.sgs.2018.02.014>, 2018.

617 Zhang, C., W. Ju, J. M. Chen, D. Li, X. Wang, W. Fan, M. Li, and M. Zan. Mapping forest stand age in China using remotely  
618 sensed forest height and observation data. *J. Geophys. Res. Biogeosci.*, 119:1163-1179,  
619 <https://doi.org/10.1002/2013JG002515>, 2014.

620 Zhang, Y., Y. Yao, X. Wang, Y. Liu, and S. Piao. Mapping spatial distribution of forest age in China. *Earth Space Sci.*, 4:108-  
621 116, <https://doi.org/10.1002/2016EA000177>, 2017.

622 Zhang, Z., F. Zhang, L. Wang, A. Lin, and L. Zhao. Biophysical climate impact of forests with different age classes in mid-  
623 and high-latitude North America. *For. Ecol. Manag.*, 494:119327. <https://doi.org/10.1016/j.foreco.2021.119327>, 2021.

624 Zhu, Z. Change detection using landsat time series: A review of frequencies, preprocessing, algorithms, and applications.  
625 *ISPRS J. Photogramm. Remote Sens.*, 130, 370-384. <https://doi.org/10.1016/j.isprsjprs.2017.06.013>, 2017.

626 Zhu, Z., and Woodcock, C.E. Continuous change detection and classification of land cover using all available Landsat data.  
627 *Remote Sens Environ.*, 144, 152-171. <https://doi.org/10.1016/j.rse.2014.01.011>, 2014.

## Supplementary

**Supplementary Table 1** Principal component analysis of 19 bioclimatic variables

| Variables | Describe                                                   | Principal Component |               |               |
|-----------|------------------------------------------------------------|---------------------|---------------|---------------|
|           |                                                            | PC1                 | PC2           | PC3           |
| BIO1      | Annual Mean Temperature                                    | <b>0.272</b>        | 0.112         | 0.224         |
| BIO2      | Mean Diurnal Range (Mean of monthly (max temp - min temp)) | <b>-0.205</b>       | 0.177         | -0.145        |
| BIO3      | Isothermality (BIO2/BIO7) (×100)                           | -0.129              | <b>0.403</b>  | -0.123        |
| BIO4      | Temperature Seasonality (standard deviation ×100)          | 0.039               | <b>-0.476</b> | 0.128         |
| BIO5      | Max Temperature of Warmest Month                           | <b>0.266</b>        | -0.093        | 0.261         |
| BIO6      | Min Temperature of Coldest Month                           | <b>0.262</b>        | 0.181         | 0.200         |
| BIO7      | Temperature Annual Range (BIO5-BIO6)                       | -0.059              | <b>-0.447</b> | 0.041         |
| BIO8      | Mean Temperature of Wettest Quarter                        | 0.221               | 0.029         | <b>0.447</b>  |
| BIO9      | Mean Temperature of Driest Quarter                         | <b>0.253</b>        | 0.220         | 0.097         |
| BIO10     | Mean Temperature of Warmest Quarter                        | <b>0.272</b>        | -0.069        | 0.264         |
| BIO11     | Mean Temperature of Coldest Quarter                        | 0.243               | <b>0.253</b>  | 0.168         |
| BIO12     | Annual Precipitation                                       | <b>0.272</b>        | -0.013        | -0.271        |
| BIO13     | Precipitation of Wettest Month                             | 0.256               | 0.077         | <b>-0.266</b> |
| BIO14     | Precipitation of Driest Month                              | 0.255               | -0.147        | <b>-0.257</b> |
| BIO15     | Precipitation Seasonality (Coefficient of Variation)       | -0.198              | <b>0.286</b>  | 0.066         |
| BIO16     | Precipitation of Wettest Quarter                           | 0.255               | 0.110         | <b>-0.269</b> |
| BIO17     | Precipitation of Driest Quarter                            | 0.248               | -0.165        | <b>-0.275</b> |
| BIO18     | Precipitation of Warmest Quarter                           | <b>0.211</b>        | 0.210         | -0.162        |
| BIO19     | Precipitation of Coldest Quarter                           | 0.250               | -0.124        | <b>-0.303</b> |

PC1 is related to BIO1, BIO2, BIO5, BIO6, BIO9, BIO10, BIO12 and BIO18

PC2 is related to BIO3, BIO4, BIO7, BIO11 and BIO15

PC3 is related to BIO8, BIO13, BIO14, BIO16, BIO17 and BIO19.

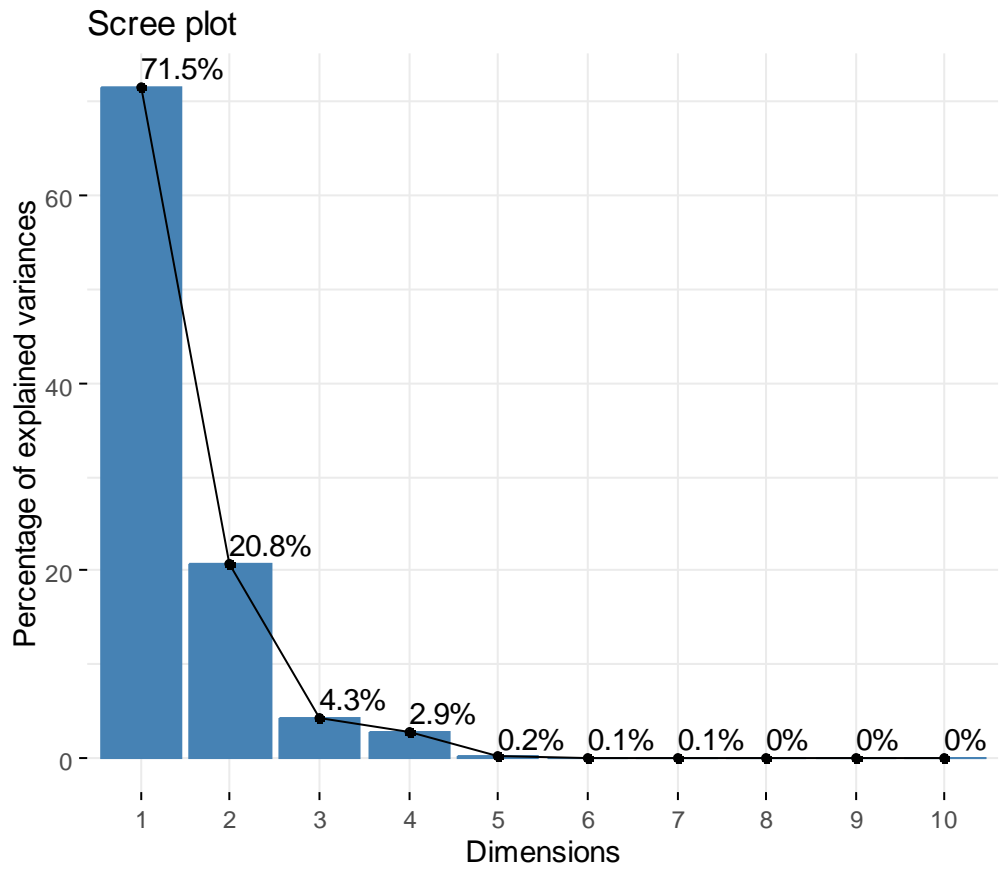

**Supplementary Figure1.** Scree plot of 19 bioclimatic variables

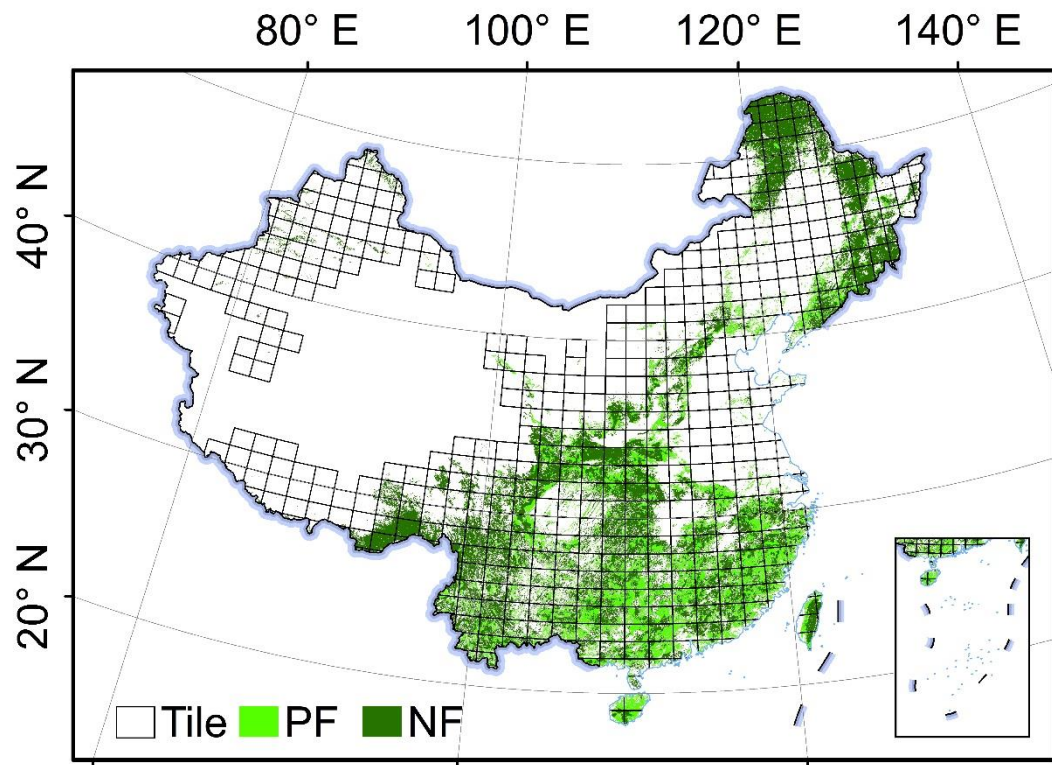

**Supplementary Figure 2.** 1°×1° grids for China's forest region. PF: planted forest, NF: Natural forest.

**Supplementary Table 2. The thirteen alternative machine learning algorithms and their accuracies( $R^2$ )**

| Model                    | Validation |         |         |          |         |         |         |         | Test    |         |         |          |         |         |         |         |
|--------------------------|------------|---------|---------|----------|---------|---------|---------|---------|---------|---------|---------|----------|---------|---------|---------|---------|
|                          | CT         | WT      | QT      | TM       | TS      | TD      | TN      | SE      | CT      | WT      | QT      | TM       | TS      | TD      | TN      | SE      |
| DecisionTree             | -0.1443    | 0.2008  | 0.2540  | 0.6540   | 0.5230  | 0.4843  | 0.2743  | 0.3521  | -0.0116 | 0.2232  | 0.0815  | 0.7207   | 0.5480  | 0.5409  | 0.2882  | 0.3586  |
| ExtraTree                | -0.1450    | 0.1879  | 0.1295  | 0.6354   | 0.4200  | 0.4582  | 0.2306  | 0.3115  | -0.2244 | 0.2527  | 0.1297  | 0.6657   | 0.4828  | 0.5660  | 0.2398  | 0.3526  |
| GaussianProcess          | -2.9984    | -1.5756 | -2.2477 | -13.0362 | -1.2202 | -2.3692 | -2.7937 | -1.2905 | -2.8423 | -1.5995 | -2.5428 | -11.2968 | -1.1853 | -2.1186 | -2.8901 | -1.2705 |
| XGB                      | 0.3311     | 0.5718  | 0.5109  | 0.7942   | 0.7106  | 0.7077  | 0.5845  | 0.6573  | 0.3402  | 0.5857  | 0.3609  | 0.8241   | 0.7272  | 0.7586  | 0.6031  | 0.6690  |
| <b>RandomForest</b>      | 0.4124     | 0.6017  | 0.5546  | 0.8113   | 0.7343  | 0.7067  | 0.6236  | 0.6609  | 0.4262  | 0.6121  | 0.5363  | 0.8414   | 0.7641  | 0.7724  | 0.6272  | 0.6749  |
| Bagging                  | 0.3646     | 0.5661  | 0.5268  | 0.7961   | 0.7043  | 0.6699  | 0.5859  | 0.6309  | 0.3674  | 0.5791  | 0.4387  | 0.8287   | 0.7315  | 0.7487  | 0.6055  | 0.6457  |
| <b>HistGradientBoost</b> | 0.3935     | 0.6039  | 0.5093  | 0.8051   | 0.7325  | 0.6931  | 0.6234  | 0.6685  | 0.4092  | 0.6113  | 0.4526  | 0.8341   | 0.7572  | 0.7825  | 0.6303  | 0.6885  |
| <b>LGBM</b>              | 0.3986     | 0.6052  | 0.5202  | 0.8083   | 0.7234  | 0.6962  | 0.6262  | 0.6726  | 0.4203  | 0.6112  | 0.4552  | 0.8362   | 0.7513  | 0.7845  | 0.6341  | 0.6891  |
| <b>GradientBoosting</b>  | 0.4208     | 0.5950  | 0.5484  | 0.8095   | 0.7260  | 0.7007  | 0.6223  | 0.6605  | 0.4543  | 0.5923  | 0.4930  | 0.8433   | 0.7435  | 0.7705  | 0.6228  | 0.6796  |
| MLP                      | 0.3990     | 0.5198  | 0.1415  | 0.5954   | 0.7076  | 0.6016  | 0.5953  | 0.6659  | 0.4311  | 0.5120  | 0.2354  | 0.7695   | 0.7170  | 0.6685  | 0.5900  | 0.6685  |
| AdaBoost                 | 0.1650     | 0.4622  | 0.4775  | 0.6436   | 0.5348  | 0.5867  | 0.5443  | 0.3152  | 0.1700  | 0.4808  | 0.4589  | 0.7705   | 0.6095  | 0.5980  | 0.5434  | 0.3559  |
| KNeighbors               | -0.0304    | 0.3386  | 0.3247  | 0.5851   | 0.4612  | 0.5574  | 0.0958  | 0.3883  | 0.0013  | 0.3779  | 0.1892  | 0.6067   | 0.5253  | 0.6302  | 0.1312  | 0.4284  |
| <b>CatBoost</b>          | 0.4263     | 0.6109  | 0.5814  | 0.8162   | 0.7409  | 0.7322  | 0.6271  | 0.6749  | 0.4501  | 0.6203  | 0.5022  | 0.8444   | 0.7602  | 0.7922  | 0.6275  | 0.6924  |



**Supplementary Table 3.** The hyperparameters and their range for different models.

| Algorithm         | Python Package                                 | Hyperparameter Range                                                                                                                                                                                                                                                                                                                                                                         |
|-------------------|------------------------------------------------|----------------------------------------------------------------------------------------------------------------------------------------------------------------------------------------------------------------------------------------------------------------------------------------------------------------------------------------------------------------------------------------------|
| RF                | sklearn.ensemble.RandomForestRegressor         | max_depth:[3,18]<br>n_estimators:[ 5000, 8000]<br>max_features:['auto', 'sqrt', 'log2']<br>min_samples_split:[ 2, 10]<br>min_samples_leaf:[ 2, 10]<br>random_state: 2023                                                                                                                                                                                                                     |
| GBDT              | sklearn.ensemble.GradientBoostingRegressor     | max_depth:[ 2, 10]<br><br>learning_rate:<br>[0.001,0.005,0.01,0.05,0.1]<br>n_estimators:[4000, 5000]<br>subsample:[ 0.7, 0.9]<br>max_features: ['auto', 'sqrt', 'log2']<br>min_samples_split:[ 2, 10]<br>random_state:2023                                                                                                                                                                   |
| HistGradientBoost | sklearn.ensemble.HistGradientBoostingRegressor | max_depth:[ 2, 10]<br><br>learning_rate:<br>[0.001,0.02,0.03,0.005,0.01,0.05,0.1]<br>max_leaf_nodes:[30, 40]<br>min_samples_leaf:[15, 25]<br>random_state:2023                                                                                                                                                                                                                               |
| LightGBM          | lightgbm                                       | reg_alpha: [0.001, 10.0]<br>reg_lambda: [0.001, 10.0]<br>num_leaves: [11, 333]<br>min_child_samples: [5, 100]<br>max_depth: [3, 20]<br>learning_rate:<br>[0.001,0.005,0.01,0.05,0.1]<br>colsample_bytree: [0.1, 0.5]<br>n_estimators: [7000, 8000]<br>cat_smooth: [10, 100]<br>cat_l2: [1, 20]<br>min_data_per_group: [50, 200]<br>cat_feature: [10, 60]<br>n_jobs: -1<br>random_state: 2023 |
| CatBoost          | catboost                                       | depth: [3, 10]<br>learning_rate:<br>[0.001,0.005,0.01,0.05,0.1]<br>iterations: [5000, 9000]<br>max_bin: [200, 400]<br>min_data_in_leaf: [1, 30]<br>l2_leaf_reg: [0.0001, 1.0, log=True]<br>subsample: [0.6, 0.9]<br>random_state: 2023                                                                                                                                                       |

**Supplementary Table 4.** The optimal hyperparameter parameter values for different MLAs.

| Vegetation division | Algorithm         | Hyperparameter values                                                                                                                                                                                                                                                                                                    |
|---------------------|-------------------|--------------------------------------------------------------------------------------------------------------------------------------------------------------------------------------------------------------------------------------------------------------------------------------------------------------------------|
| CT                  | RF                | (max_depth=8,n_estimators=6589,max_features='auto',min_samples_leaf=9,min_samples_split=8,random_state=2023)                                                                                                                                                                                                             |
|                     | GBDT              | {'max_depth': 4, 'learning_rate': 0.001, 'n_estimators': 4909, 'subsample': 0.7234085712326702, 'max_features': 'auto', 'min_samples_split':10,'random_state': 2023}                                                                                                                                                     |
|                     | CatBoost          | (depth=10,learning_rate=0.1,iterations=86,max_bin=320,min_data_in_leaf=27,l2_leaf_reg=0.17934206956587195,subsample=0.6773452775007673,random_seed=2023)                                                                                                                                                                 |
| WT                  | RF                | (max_depth=19,n_estimators=348,max_features='sqrt',min_samples_leaf=1,min_samples_split=3,random_state=2023)                                                                                                                                                                                                             |
|                     | LGBM              | {'reg_alpha': 4.188760632650688, 'reg_lambda': 4.255499587500175, 'num_leaves': 75, 'min_child_samples': 7, 'max_depth': 19, 'learning_rate': 0.001, 'colsample_bytree': 0.4928730464443524, 'n_estimators': 7117, 'cat_smooth': 84, 'cat_l2': 15, 'min_data_per_group': 193, 'cat_feature': 28, 'random_state': 2023}   |
|                     | CatBoost          | (depth=12,learning_rate=0.05,iterations=133,max_bin=314,min_data_in_leaf=8,l2_leaf_reg=0.0021616691540516635,subsample=0.827218563526197,random_seed=2023)                                                                                                                                                               |
| QT                  | RF                | (max_depth=9,n_estimators=100,max_features='auto',min_samples_leaf=1,min_samples_split=2,random_state=2023)                                                                                                                                                                                                              |
|                     | GBDT              | {'max_depth': 5, 'learning_rate': 0.001, 'n_estimators': 4873, 'subsample': 0.6338013854778914, 'max_features': 'sqrt', 'min_samples_split':8,'random_state': 2023}                                                                                                                                                      |
|                     | CatBoost          | (depth=7,learning_rate=0.1,iterations=90,max_bin=337,min_data_in_leaf=4,l2_leaf_reg=0.0008155227484111563,subsample=0.7808941610379249,random_seed=2023)                                                                                                                                                                 |
| TM                  | HistGradientBoost | (learning_rate=0.05, max_leaf_nodes=33, max_depth=5, min_samples_leaf=21, l2_regularization=0.0001, max_bins=200, early_stopping='auto', random_state=2023)                                                                                                                                                              |
|                     | GBDT              | {'max_depth': 5, 'learning_rate': 0.001, 'n_estimators': 4970, 'subsample': 0.7323582473497865, 'max_features': 'auto', 'min_samples_split':9,'random_state': 2023}                                                                                                                                                      |
|                     | CatBoost          | (depth=5,learning_rate=0.1,iterations=228,max_bin=298,min_data_in_leaf=14,l2_leaf_reg=0.912715671115768,subsample=0.7691332886798857,random_seed=2023)                                                                                                                                                                   |
| TS                  | RF                | (max_depth=12,n_estimators=105,max_features='auto',min_samples_leaf=2,min_samples_split=8,random_state=2023)                                                                                                                                                                                                             |
|                     | LightGBM          | {'reg_alpha': 3.0022329902119083, 'reg_lambda': 6.129604703602383, 'num_leaves': 69, 'min_child_samples': 38, 'max_depth': 15, 'learning_rate': 0.001, 'colsample_bytree': 0.48372749547013316, 'n_estimators': 7571, 'cat_smooth': 82, 'cat_l2': 5, 'min_data_per_group': 128, 'cat_feature': 41, 'random_state': 2023} |
|                     | CatBoost          | (depth=7,learning_rate=0.005,iterations=4164,max_bin=215,min_data_in_leaf=24,l2_leaf_reg=0.00017571003237103587,subsample=0.8817081947911567,random_seed=2023)                                                                                                                                                           |
| TD                  | HistGradientBoost | (learning_rate=0.1, max_leaf_nodes=39, max_depth=4, min_samples_leaf=22, l2_regularization=0.0001, max_bins=200,                                                                                                                                                                                                         |

|    |                   |                                                                                                                                                                                                                                                                                                                          |
|----|-------------------|--------------------------------------------------------------------------------------------------------------------------------------------------------------------------------------------------------------------------------------------------------------------------------------------------------------------------|
|    |                   | early_stopping='auto', random_state=2023)                                                                                                                                                                                                                                                                                |
|    | LightGBM          | {'reg_alpha': 2.1333544399270994, 'reg_lambda': 7.980678166407649, 'num_leaves': 217, 'min_child_samples': 5, 'max_depth': 5, 'learning_rate': 0.003, 'colsample_bytree': 0.43984300935044063, 'n_estimators': 7992, 'cat_smooth': 76, 'cat_l2': 7, 'min_data_per_group': 187, 'cat_feature': 47, 'random_state': 2023}  |
|    | CatBoostRegressor | (depth=5, learning_rate=0.01, iterations=5203, max_bin=246, min_data_in_leaf=6, l2_leaf_reg=0.00045191356462636874, subsample=0.6391293474573634, random_seed=2023)                                                                                                                                                      |
| TN | HistGradientBoost | (learning_rate=0.05, max_leaf_nodes=38, max_depth=6, min_samples_leaf=20, l2_regularization=0.0001, max_bins=200, early_stopping='auto', random_state=2023)                                                                                                                                                              |
|    | LightGBM          | {'reg_alpha': 3.0022329902119083, 'reg_lambda': 6.129604703602383, 'num_leaves': 69, 'min_child_samples': 38, 'max_depth': 15, 'learning_rate': 0.001, 'colsample_bytree': 0.48372749547013316, 'n_estimators': 7571, 'cat_smooth': 82, 'cat_l2': 5, 'min_data_per_group': 128, 'cat_feature': 41, 'random_state': 2023} |
|    | CatBoost          | (depth=10, learning_rate=0.1, iterations=155, max_bin=319, min_data_in_leaf=1, l2_leaf_reg=0.33907394509650335, subsample=0.7682844712570389, random_seed=2023)                                                                                                                                                          |
| SE | LightGBM          | {'reg_alpha': 6.116715128459515, 'reg_lambda': 5.231647634428009, 'num_leaves': 18, 'min_child_samples': 73, 'max_depth': 8, 'learning_rate': 0.002, 'colsample_bytree': 0.4726653436124117, 'n_estimators': 7288, 'cat_smooth': 67, 'cat_l2': 6, 'min_data_per_group': 79, 'cat_feature': 36, 'random_state': 2023}     |
|    | MLP               | {'hidden_layer_sizes': (200, 200, 200), 'activation': 'relu', 'solver': 'adam', 'alpha': 0.0001, 'batch_size': 'auto', 'learning_rate': 'constant', 'learning_rate_init': 0.001, 'max_iter': 155, 'random_state': 2023}                                                                                                  |
|    | CatBoost          | (depth=7, learning_rate=0.005, iterations=6248, max_bin=383, min_data_in_leaf=20, l2_leaf_reg=0.6887500276693759, subsample=0.7127716543175433, random_seed=2023)                                                                                                                                                        |

---

**Supplementary Table 5.** The training results of different MLAs

| Vegetation division | Algorithm         | Train  |        | Validation |         |
|---------------------|-------------------|--------|--------|------------|---------|
|                     |                   | R2     | RMSE   | R2         | RMSE    |
| CT                  | RF                | 0.6102 | 4.6402 | 0.4394     | 25.6178 |
|                     | GBDT              | 0.6463 | 4.5287 | 0.4398     | 25.6177 |
|                     | CatBoost          | 0.7573 | 4.1219 | 0.4307     | 25.8266 |
| WT                  | RF                | 0.9286 | 2.2631 | 0.6108     | 11.9231 |
|                     | LGBM              | 0.8303 | 2.8096 | 0.6112     | 11.9211 |
|                     | CatBoost          | 0.8309 | 2.8073 | 0.6085     | 11.9593 |
| QT                  | RF                | 0.9326 | 4.7895 | 0.5135     | 56.7438 |
|                     | GBDT              | 0.8846 | 5.4791 | 0.5430     | 55.6378 |
|                     | CatBoost          | 0.9637 | 4.1029 | 0.5648     | 54.1309 |
| TM                  | HistGradientBoost | 0.8729 | 1.9054 | 0.8129     | 4.3884  |
|                     | GBDT              | 0.9059 | 1.7673 | 0.8139     | 4.3779  |
|                     | CatBoost          | 0.8969 | 1.8083 | 0.8202     | 4.3006  |
| TS                  | RF                | 0.9068 | 3.2872 | 0.7365     | 18.0381 |
|                     | LightGBM          | 0.8685 | 3.5823 | 0.7456     | 17.7228 |
|                     | CatBoost          | 0.9375 | 2.9747 | 0.7493     | 17.5945 |
| TD                  | HistGradientBoost | 0.8555 | 4.8085 | 0.7125     | 32.2791 |
|                     | LightGBM          | 0.9485 | 3.7154 | 0.7065     | 32.6168 |
|                     | CatBoostRegressor | 0.9834 | 2.8009 | 0.7235     | 31.5870 |
| TN                  | HistGradientBoost | 0.6581 | 4.0517 | 0.6246     | 17.1609 |
|                     | LightGBM          | 0.8080 | 3.5072 | 0.6292     | 17.0570 |
|                     | CatBoost          | 0.7633 | 3.6956 | 0.6198     | 17.2713 |
| SE                  | LightGBM          | 0.7273 | 3.3467 | 0.6722     | 12.2440 |
|                     | MLP               | 0.7013 | 3.4237 | 0.6571     | 12.5179 |
|                     | CatBoost          | 0.7899 | 3.1354 | 0.6774     | 12.1481 |

**Supplementary Table 6.** Mean and standard deviation of forest age in provinces

| Province       | Mean     | S.D.     |
|----------------|----------|----------|
| Anhui          | 30.0438  | 13.18046 |
| Beijing        | 23.72932 | 6.941676 |
| Chongqing      | 44.21707 | 14.81873 |
| Fujian         | 34.71088 | 14.08378 |
| Gansu          | 62.91986 | 28.90555 |
| Guangdong      | 32.2954  | 14.03617 |
| Guangxi        | 35.98391 | 14.40237 |
| Guizhou        | 38.97128 | 14.09774 |
| Hainan         | 31.67802 | 14.70032 |
| Hebei          | 20.04016 | 9.452565 |
| Heilongjiang   | 76.63183 | 26.88827 |
| Henan          | 26.42557 | 13.65384 |
| Hong Kong      | 2.905065 | 3.205983 |
| Hubei          | 44.2699  | 17.3144  |
| Hunan          | 30.98115 | 11.84794 |
| Inner Mongolia | 95.71522 | 35.21181 |

|          |          |          |
|----------|----------|----------|
| Jiangsu  | 22.35844 | 11.39468 |
| Jiangxi  | 34.05567 | 13.07562 |
| Jilin    | 75.20958 | 26.22582 |
| Liaoning | 29.84999 | 21.79875 |
| Macao    | 3.805029 | 2.552609 |
| Ningxia  | 44.01774 | 22.64126 |
| Qinghai  | 115.7855 | 47.51708 |
| Shaanxi  | 52.42966 | 20.90854 |
| Shandong | 15.81338 | 6.811547 |
| Shanghai | 5.695209 | 3.581797 |
| Shanxi   | 30.59349 | 11.17819 |
| Sichuan  | 75.09604 | 32.48283 |
| Taiwan   | 53.18191 | 20.35996 |
| Tianjin  | 15.6741  | 6.724648 |
| Tibet    | 83.86414 | 30.52417 |
| Xinjiang | 103.28   | 50.83277 |
| Yunnan   | 54.69701 | 21.25958 |
| Zhejiang | 35.3726  | 13.07106 |

**Supplementary Table 7.** Mean and standard deviation of forest age in eight vegetation zones

| Vegetation zone | Mean     | S.D.     |
|-----------------|----------|----------|
| CT              | 106.6109 | 24.25592 |
| WT              | 27.47919 | 13.87375 |
| QT              | 136.9514 | 36.23872 |
| TM              | 52.04598 | 26.27037 |
| TS              | 106.0278 | 56.54841 |
| TD              | 59.32036 | 33.32852 |
| TN              | 67.25398 | 22.54142 |
| SE              | 48.23603 | 26.65255 |

**Supplementary Table 8.** Field measurements of forest age collected from published papers

| ID | Longitude | Latitude | Year      | Mean age (2020) | Reference           |
|----|-----------|----------|-----------|-----------------|---------------------|
| 1  | 23.2450   | 113.4210 | 2020      | 6               | Chen et al., (2022) |
| 2  | 23.2260   | 113.3930 | 2020      | 10              | Chen et al., (2022) |
| 3  | 23.2560   | 113.4190 | 2020      | 15              | Chen et al., (2022) |
| 4  | 23.2120   | 113.3940 | 2020      | 20              | Chen et al., (2022) |
| 5  | 23.2550   | 113.3810 | 2020      | 30              | Chen et al., (2022) |
| 6  | 24.5200   | 114.4300 | 2010-2011 | 40              | Di Y et al. (2012)  |
| 7  | 26.8814   | 117.9353 | 2017      | 10              | Feng et al., (2021) |
| 8  | 30.0800   | 110.5600 | 2010      | 40              | Hu et al., (2012)   |
| 9  | 31.4300   | 110.3500 | 2010      | 45              | Hu et al., (2012)   |
| 10 | 23.4800   | 100.5300 | 2013      | 67              | Li et al. (2015)    |
| 11 | 23.0502   | 109.3289 | 2021      | 3               | Li et al., (2021)   |
| 12 | 23.0535   | 109.3329 | 2021      | 8               | Li et al., (2021)   |
| 13 | 23.1118   | 109.2420 | 2021      | 18              | Li et al., (2021)   |

|    |         |          |           |     |                     |
|----|---------|----------|-----------|-----|---------------------|
| 14 | 23.0533 | 109.1602 | 2021      | 21  | Li et al., (2021)   |
| 15 | 25.3300 | 114.5700 | 2012      | 53  | Qiu et al., (2020)  |
| 16 | 25.3300 | 114.5700 | 2012      | 53  | Qiu et al., (2020)  |
| 17 | 25.3300 | 114.5700 | 2012      | 36  | Qiu et al., (2020)  |
| 18 | 22.0483 | 110.4658 | 2020      | 5   | Song et al., (2021) |
| 19 | 21.9192 | 110.5008 | 2020      | 15  | Song et al., (2021) |
| 20 | 22.0222 | 110.5003 | 2020      | 5   | Song et al., (2021) |
| 21 | 36.4200 | 109.5300 | 2013      | 79  | Sun et al., (2020)  |
| 22 | 23.7700 | 101.2700 | 2013      | 22  | Tong et al. (2013)  |
| 23 | 23.7700 | 101.2700 | 2013      | 37  | Tong et al. (2013)  |
| 24 | 23.9000 | 101.2700 | 2013      | 52  | Tong et al. (2013)  |
| 25 | 28.6017 | 104.5672 | 2011      | 26  | Wu et al. (2023)    |
| 26 | 28.6093 | 104.5769 | 2015      | 13  | Wu et al. (2023)    |
| 27 | 22.0263 | 106.9073 | 2013      | 30  | Wu et al. (2023)    |
| 28 | 22.0243 | 106.9102 | 2013      | 30  | Wu et al. (2023)    |
| 29 | 22.0264 | 106.9132 | 2013      | 30  | Wu et al. (2023)    |
| 30 | 22.8667 | 108.1667 | 2012      | 25  | Wu et al. (2023)    |
| 31 | 21.9667 | 109.2833 | 2012      | 30  | Wu et al. (2023)    |
| 32 | 26.6993 | 109.6076 | 2010      | 23  | Wu et al. (2023)    |
| 33 | 26.7003 | 109.6077 | 2010      | 23  | Wu et al. (2023)    |
| 34 | 24.7633 | 109.8933 | 2012      | 21  | Wu et al. (2023)    |
| 35 | 34.0909 | 110.4029 | 2012      | 25  | Wu et al. (2023)    |
| 36 | 30.9189 | 110.6969 | 2015      | 30  | Wu et al. (2023)    |
| 37 | 27.2938 | 112.8481 | 2013      | 18  | Wu et al. (2023)    |
| 38 | 27.2943 | 112.8486 | 2013      | 17  | Wu et al. (2023)    |
| 39 | 27.3545 | 113.3865 | 2013      | 21  | Wu et al. (2023)    |
| 40 | 26.8139 | 117.5247 | 2014      | 27  | Wu et al. (2023)    |
| 41 | 26.8072 | 117.5408 | 2014      | 20  | Wu et al. (2023)    |
| 42 | 52.9783 | 122.5456 | 2010      | 36  | Wu et al. (2023)    |
| 43 | 25.9500 | 108.3700 | 2017      | 36  | Zhou et al., 2018   |
| 44 | 18.7400 | 108.8500 | 2011-2016 | 59  | Zhu et al. (2017)   |
| 45 | 24.4500 | 113.6800 | 2011-2016 | 52  | Zhu et al. (2017)   |
| 46 | 24.8900 | 113.0300 | 2011-2016 | 49  | Zhu et al. (2017)   |
| 47 | 24.9600 | 112.9600 | 2011-2016 | 98  | Zhu et al. (2017)   |
| 48 | 25.3200 | 114.1500 | 2011-2016 | 71  | Zhu et al. (2017)   |
| 49 | 25.7100 | 100.0400 | 2011-2016 | 56  | Zhu et al. (2017)   |
| 50 | 25.7200 | 100.0500 | 2011-2016 | 85  | Zhu et al. (2017)   |
| 51 | 25.7200 | 100.0500 | 2011-2016 | 108 | Zhu et al. (2017)   |
| 52 | 25.8300 | 111.6500 | 2011-2016 | 31  | Zhu et al. (2017)   |
| 53 | 25.8000 | 112.8700 | 2011-2016 | 26  | Zhu et al. (2017)   |
| 54 | 25.6800 | 118.1900 | 2011-2016 | 40  | Zhu et al. (2017)   |
| 55 | 26.1700 | 106.6500 | 2011-2016 | 45  | Zhu et al. (2017)   |
| 56 | 26.5800 | 116.3400 | 2011-2016 | 61  | Zhu et al. (2017)   |
| 57 | 27.0200 | 111.3400 | 2011-2016 | 40  | Zhu et al. (2017)   |
| 58 | 27.0100 | 117.0700 | 2011-2016 | 64  | Zhu et al. (2017)   |
| 59 | 27.8400 | 98.6800  | 2011-2016 | 41  | Zhu et al. (2017)   |
| 60 | 27.9000 | 117.3600 | 2011-2016 | 84  | Zhu et al. (2017)   |
| 61 | 27.9200 | 117.3500 | 2011-2016 | 93  | Zhu et al. (2017)   |
| 62 | 27.7300 | 117.6300 | 2011-2016 | 74  | Zhu et al. (2017)   |

|    |         |          |           |     |                   |
|----|---------|----------|-----------|-----|-------------------|
| 63 | 27.6000 | 117.4600 | 2011-2016 | 54  | Zhu et al. (2017) |
| 64 | 28.2900 | 99.1600  | 2011-2016 | 114 | Zhu et al. (2017) |
| 65 | 28.1100 | 117.0000 | 2011-2016 | 63  | Zhu et al. (2017) |
| 66 | 29.1000 | 115.5700 | 2011-2016 | 56  | Zhu et al. (2017) |
| 67 | 28.9300 | 118.0600 | 2011-2016 | 88  | Zhu et al. (2017) |
| 68 | 29.2400 | 118.1000 | 2011-2016 | 78  | Zhu et al. (2017) |
| 69 | 29.2200 | 119.5200 | 2011-2016 | 60  | Zhu et al. (2017) |
| 70 | 30.0300 | 102.8300 | 2011-2016 | 54  | Zhu et al. (2017) |
| 71 | 29.7700 | 110.0900 | 2011-2016 | 94  | Zhu et al. (2017) |
| 72 | 31.1700 | 102.9900 | 2011-2016 | 69  | Zhu et al. (2017) |
| 73 | 31.3500 | 102.8300 | 2011-2016 | 69  | Zhu et al. (2017) |
| 74 | 31.5100 | 110.4300 | 2011-2016 | 94  | Zhu et al. (2017) |
| 75 | 32.2200 | 102.6100 | 2011-2016 | 78  | Zhu et al. (2017) |
| 76 | 34.0500 | 107.7000 | 2011-2016 | 84  | Zhu et al. (2017) |
| 77 | 34.0700 | 107.6900 | 2011-2016 | 64  | Zhu et al. (2017) |
| 78 | 33.9300 | 112.1600 | 2011-2016 | 38  | Zhu et al. (2017) |
| 79 | 34.4800 | 110.5700 | 2011-2016 | 32  | Zhu et al. (2017) |
| 80 | 36.3100 | 118.0500 | 2011-2016 | 47  | Zhu et al. (2017) |
| 81 | 37.2600 | 122.4600 | 2011-2016 | 48  | Zhu et al. (2017) |
| 82 | 37.8600 | 111.4600 | 2011-2016 | 52  | Zhu et al. (2017) |
| 83 | 39.9900 | 115.0200 | 2011-2016 | 72  | Zhu et al. (2017) |
| 84 | 39.9500 | 115.4300 | 2011-2016 | 79  | Zhu et al. (2017) |
| 85 | 39.9600 | 115.4300 | 2011-2016 | 79  | Zhu et al. (2017) |
| 86 | 40.5700 | 115.7700 | 2011-2016 | 41  | Zhu et al. (2017) |
| 87 | 40.3900 | 117.4600 | 2011-2016 | 30  | Zhu et al. (2017) |
| 88 | 40.3100 | 117.5700 | 2011-2016 | 45  | Zhu et al. (2017) |
| 89 | 41.2700 | 125.4100 | 2011-2016 | 52  | Zhu et al. (2017) |
| 90 | 42.2000 | 127.5100 | 2011-2016 | 67  | Zhu et al. (2017) |
| 91 | 42.8100 | 127.9100 | 2011-2016 | 99  | Zhu et al. (2017) |
| 92 | 44.4900 | 81.2600  | 2011-2016 | 153 | Zhu et al. (2017) |
| 93 | 44.7800 | 129.2400 | 2011-2016 | 72  | Zhu et al. (2017) |
| 94 | 45.3800 | 127.6000 | 2011-2016 | 63  | Zhu et al. (2017) |
| 95 | 46.4700 | 131.1100 | 2011-2016 | 89  | Zhu et al. (2017) |
| 96 | 47.6700 | 128.0700 | 2011-2016 | 57  | Zhu et al. (2017) |
| 97 | 47.9900 | 88.2600  | 2011-2016 | 46  | Zhu et al. (2017) |
| 98 | 51.7800 | 123.0200 | 2011-2016 | 109 | Zhu et al. (2017) |
| 99 | 52.8200 | 123.2400 | 2011-2016 | 100 | Zhu et al. (2017) |

---
