# Supplementary material for: 2020 forest age map for China with 30 m resolution
Source: Copernicus journal article supplement (doi:10.5194/essd-2023-385), 2023-10-10
Supplement: Supplementary file [file essd-2023-385-RC1-supplement.pdf]

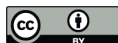

# 1 2020 forest age map for China with 30 m resolution

2 Kai Cheng<sup>1</sup>, Yuling Chen<sup>1</sup>, Tianyu Xiang<sup>2</sup>, Haitao Yang<sup>1</sup>, Weiyang Liu<sup>3</sup>, Yu Ren<sup>1,4</sup>, Hongcan Guan<sup>5</sup>,  
3 Tianyu Hu<sup>6</sup>, Qin Ma<sup>7</sup>, Qinghua Guo<sup>1,4\*</sup>

4 <sup>1</sup>Institute of Remote Sensing and Geographic Information System, School of Earth and Space Sciences, Peking University,  
5 Beijing 100871, China

6 <sup>2</sup> College of Earth Sciences, Chengdu University of Technology, Chengdu 610059, China

7 <sup>3</sup> State Forestry and Grassland Administration Key Laboratory of Forest Resources & Environmental Management, Beijing  
8 Forestry University, Beijing 100083, China

9 <sup>4</sup> Institute of Ecology, College of Urban and Environmental Sciences, Peking University, Beijing 100871, China

10 <sup>5</sup> School of Tropical Agriculture and Forestry, Hainan University, Haikou 570100, China

11 <sup>6</sup> State Key Laboratory of Vegetation and Environmental Change, Institute of Botany, Chinese Academy of Sciences, Beijing  
12 100093, China

13 <sup>7</sup> School of Geography, Nanjing Normal University, Nanjing 210023, China

14

15 *Correspondence to:* Qinghua Guo (guo.qinghua@pku.edu.cn)

16 **Abstract.** A spatially explicit, high-resolution forest age map is critical for quantifying forest carbon stock and carbon  
17 sequestration potential. Previous endeavours to estimate forest age in China at national scale mainly concentrated on a sparse  
18 resolution or incomplete forest ecosystems because of complex species composition, vast forest areas, insufficient field  
19 measurements, and the lack of effective methods. To overcome these limitations, we construct a framework for estimating  
20 China's forest age by combining remote-sensing time series analysis with **machine learning algorithms** based on massive field  
21 measurements and remote-sensing dataset. Specifically, the LandTrendr time series analysis is first applied to detect forest  
22 disturbances from 1985 to 2020, with the time since the last disturbance serving as a proxy for forest age. Next, for pixels  
23 where no disturbance, machine learning algorithms are used to estimate forest age from independent variables, including forest  
24 height, climate, terrain, soil, and forest-age field measurements. Finally, **MLA** models are established for each vegetation  
25 division and used to estimate forest ages. Combining these two methods produces a spatially explicit 30 m resolution forest-  
26 age map for China in the year of 2020. Validation against independent field plots produces a  $R^2$  from 0.51 to 0.63. Nationally,  
27 the average forest age is 56.1 years (standard deviation = 32.7 years), where the Qinghai-Tibet Plateau alpine vegetation zone  
28 has the oldest forest with an average of 138.0 years, whereas the forest in the warm temperate deciduous-broadleaf forest  
29 vegetation zone averages only 28.5 years. This 30-m-resolution forest-age map provides vital information for accurately  
30 understanding the ecological benefits of China's forests and to sustainably manage China's forest resources.

## 31 1 Introduction

32 Forest age provides critical information about forest ecosystem succession and condition, making it essential for understanding  
33 the ecological benefits of forests (Lin et al., 2023). China's forests have been significantly disrupted in the past few decades



34 due to natural disasters and human activities (Niu et al., 2023), resulting in substantial changes to the forest-age structure. This  
35 situation makes it significantly challenging to accurately understand forest ecosystem carbon storage (Pan et al., 2011; Tong  
36 et al., 2020). Because of complex species composition, vast forest areas, insufficient field measurements, and the lack of  
37 effective methods, existing estimates of the China's forest age on the national scale have concentrated on sparse resolution  
38 (Zhang et al., 2017) or incomplete forest ecosystem (Xiao et al., 2023). This brought considerable uncertainties in assessing  
39 the carbon sources and sinks in China's forest ecosystem (Piao et al., 2022; Wang et al., 2022). Therefore, there is an urgent  
40 need to map time-efficient forest age with high spatial resolution across China.

41 Currently, China's forest age is acquired mainly through the national forest inventory, which is highly accurate (Xiao et al.,  
42 2023) but requires extensive labour and material resources and is time-consuming and costly (Liu et al., 2022). Additionally,  
43 most of China's forests are in steep mountainous areas that are difficult to access (Cheng et al., 2023a), which limits the survey  
44 range and uneven distribution of field samples, making it difficult to estimate the age of China's forests on a national scale.  
45 Thus, using the traditional method of forest inventory is difficult to capture the complete age distribution and spatial  
46 characteristics of China's forests in a timely and accurate manner.

47 Remote sensing technology has been proved effective in estimating forest cover (Su et al., 2020; Tubiello et al., 2023) and  
48 forest structure (Yu et al., 2020a; Maltman et al., 2023a) at multiple scales. The opening and sharing of Landsat time series  
49 and the development of Google Earth Engine (GEE) cloud-processing platform has facilitated the application of remote sensing  
50 to estimate forest age. Several studies have focused on mapping China's forest age; for example, Xiao et al. (2023) mapped  
51 the age of China's young forests at 30 m resolution by using continuous change detection and classification (CCDC) method.  
52 Yu et al. (2020a) produced a 1-km resolution map of the age for planted forests in China by using the age-height equations.  
53 Zhang et al. (2017) proposed a top-down method to generate a 1km stand age map using climate and forest height data. Zhang  
54 et al. (2014) mapped a national forest age map with 1 km resolution by using remote-sensing forest height and forest type data.  
55 However, the existing China's forest age map at on a national scale has been typically undertaken at coarser spatial resolution  
56 (e.g., 1 km), with finer resolution (e.g., 30 m) reserved for young forests. There is still lacking forest age spatial dataset with  
57 high resolution covering all of China's forests region.

58 The use of remote sensing to map forest age primarily encompasses two methodological categories. The first is statistical  
59 parametric regression approaches, which estimates forest age through establishing a coherent relationship between remote  
60 sensing features and field-collected empirical samples to deduce forest age (Maltamo et al., 2020; Schumacher et al., 2020a).  
61 Growth models are one of the most popular parametric models of forest age estimation (Zhang et al., 2014; Zhang et al., 2017;  
62 Yu et al., 2020b). However, this type of model is based on tree species, which makes it hard to derive forest age when lacking  
63 species information, especially over large scales. The second methodological category is nonparametric machine learning  
64 algorithms (MLAs), which are more flexible and can handle complex problems (Alerkans et al., 2022). Currently, the  
65 application of MLAs to estimate national forest age has not been widely explored. Some previous studies used a single MLA,  
66 such as Random Forest (RF) (Besnard et al., 2021b), to estimate the age of the forest. However, the wide distribution of forests,  
67 complex forest types, and diverse terrain and climate conditions in China make applying a single model to determine the

2  
make it difficult to apply a single model to determine the national age of forests



68 national age forests difficult. Therefore, it is necessary to explore the applicability of MLAs in the estimation of forest age in  
69 different regions of China.

70 The objective of the present study is to generate the first China's forest age dataset at 30 m resolution using multi-source  
71 datasets based on remote sensing time series analysis and MLAs. Specifically, first, we apply the LandTrendr change detection  
72 algorithm to monitor forests disturbed between 1985 and 2020 to estimate their ages. Subsequently, utilizing mainstream  
73 machine learning algorithms, we engage in a zone-based exploration to determine the optimal models for forest age estimation  
74 in undisturbed areas to estimate forest age. Finally, the resulting forest age map is validated by using forest field measurements  
75 and existing remote sensing products. The generated 30-m-resolution forest age map provides critical information to quantify  
76 forest carbon storage and to sustainably manage China's forests.

## 77 **2 Materials and methods**

### 78 **2.1 Dataset and pre-processing**

#### 79 **2.1.1 Forest inventory data**

80 The data from China's seventh national forest inventory survey from 2004 to 2008 (<http://www.forestry.gov.cn/>) were  
81 collected to develop models to estimate forest age. The inventory involves systematically and accurately monitoring the  
82 national forest resources based on 667m<sup>2</sup> sample plots covering the whole country (Ren et al., 2011). The main information  
83 collected from the sample plots are tree species, stand age, average tree height, and geographic location. The stand age is  
84 determined based on the planting time or is estimated using tree diameter at breast height (Zhang et al., 2017). We totally  
85 collected 58,033 field plots ranging in age from 1 to 480 years (Figures 1b and 1c). The mean age of the samples is 34.0 years,  
86 with a standard deviation of 29.6 years. The sample plots were distributed across eight vegetation divisions (Figure 1b), each  
87 containing at least 436 sample plots for building MLA models to estimate forest age (Figure 1d).

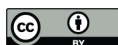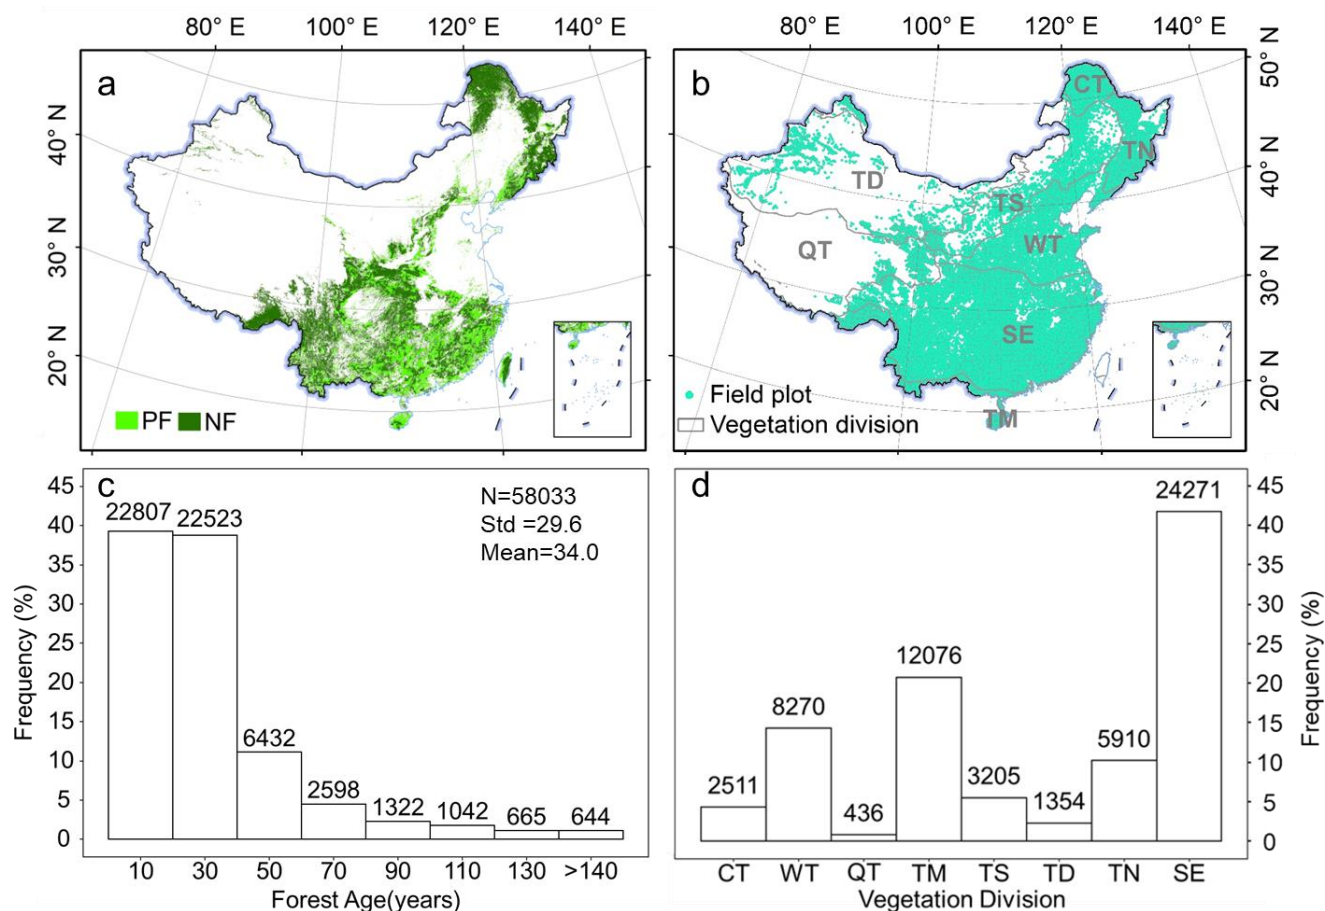

88

89 **Figure 1.** Forest mask and field sample distribution. (a) Planted forest and natural forest mask generated by Cheng et al. (2023). (b)   
 90 Distribution of field samples over eight vegetation divisions. (c) Frequency distribution of field sample ages. (d) Frequency distribution of   
 91 field samples for eight vegetation divisions. PF: planted forest, NF: natural forest, CT: Cold Temperate needleleaf forest, WT: Warm   
 92 Temperate deciduous-broadleaf forest, QT: Qinghai-Tibet Plateau alpine vegetation, TM: Tropical Monsoon forest-rainforest, TS:   
 93 Temperate Steppe, TD: Temperate Desert, TN: Temperate Needleleaf-broadleaf mixed forest, SE: Subtropical Evergreen broadleaf forest.   
 94 N: the number of plots, Std: standard deviation, Mean: mean age.

### 95 2.1.2 Landsat time-series data

96 From the GEE platform, we collected Landsat TM, ETM+, OLI Tier 1 surface reflectance images dating from 1985 to 2020   
 97 to estimate forest age for disturbed forest regions. All data were atmospherically corrected and processed by the Land Surface   
 98 Reflectance Code and the Landsat Ecosystem Disturbance Adaptive Processing System algorithms. We removed the clouds   
 99 or cloud shadows using the C function of the mask algorithm (Du et al., 2023), then we created composited images using a   
 100 median compositing method for forest regions. Finally, we calculated the normalized burn ratio (NBR) to detect forest   
 101 disturbance. NBR has been proved effective in numerous studies detecting forest disturbance (Du et al., 2023; Tian et al.,   
 102 2023). It is calculated as follows by using the near-infrared (NIR) and short-wave infrared (SWIR) bands:



$$NBR = \frac{NIR - SWIR}{NIR + SWIR} \quad (\text{Eq. 1})$$

### 103 2.1.3 Forest mask

104 This study uses the 2020 dataset of planted and natural forests at 30 m resolution in China (Figure 1a) as a mask for forest age  
105 mapping. This dataset is produced by integrating multisource remote-sensing data and a large number of crowdsourced samples,  
106 with an overall accuracy of over 80% (Cheng et al., 2023a). In this study, we employ this dataset as a forest mask and utilize  
107 a combination of time series change detection algorithms and MLAs to trace the age of these planted and natural forests.

### 108 2.1.4 Forest height data

109 The canopy height data for China was downloaded from the website (<https://3decology.org/>), which was generated based on  
110 deep learning by integrating Global Ecosystem Dynamics Investigation and Ice, Cloud and land Elevation Satellite -2 data.  
111 This dataset has a spatial resolution of 30 m and corresponds to 2019. The accuracy of this national forest canopy height data  
112 was assessed by comparing three independent validation datasets, indicating high accuracy for the canopy height product by  
113 neural network guided interpolation ( $R^2 \geq 0.55$ ,  $RMSE \leq 5.5$  m) (Liu et al., 2022). Notably, the forest extent used in this dataset  
114 is consistent with the forest extent mentioned earlier for planted and natural forests, ensuring spatial consistency when  
115 estimating forest age.

### 116 2.1.5 Climate data

117 Climate data were acquired from Worldclim 2.1 (<https://worldclim.org/>), which offers 19 bioclimatic variables, including  
118 temperature and precipitation, with 30 arc-second resolutions. The 19 bioclimatic variables include annual trends, seasonality,  
119 and extreme environmental factors in temperature and precipitation. We resampled the 19 GeoTiff (.tif) files to 30 m resolution  
120 using a nearest-resampling method for spatial resolution consistency. To reduce the dimension of bioclimatic variables, we  
121 applied a principal component analysis to map the 19 bioclimatic variables into a new principal component (PC) space. We  
122 use the first three components PC1, PC2, PC3 to represent the climate factors. According to the results of the analysis, PC1  
123 gives annual trends in temperature and precipitation, PC2 gives seasonal variations in temperature and precipitation, and PC3  
124 gives precipitation and temperature extremes (Supplementary Table 1).

### 125 2.1.6 Soil data

126 Soil data were extracted from the harmonized world soil database, V1.2, developed jointly by the Food and Agriculture  
127 Organization of the United Nations, the International Institute for Applied Systems, the ISRIC-World Soil Information, the  
128 Institute of Soil Science, Chinese Academy of Sciences, and the Joint Research Centre of the European Commission with a  
129 resolution of 30 arc-seconds. As per previous studies, soil type and texture were selected from the soil dataset in this study to



130 construct the model to estimate forest age (Besnard et al., 2021a). We also resampled the soil data to 30 m using a nearest-  
131 resampling method.

### 132 2.1.7 Topographic data

133 The Shuttle Radar Topography Mission (SRTM) V3 provides global digital elevation data at 30 m resolution and was used in  
134 this study to extract topographic variables (Su et al., 2020). Three topographic features, elevation, slope, and aspect, were  
135 calculated to estimate forest ages.

136 **Table 1.** Descriptions of variables used to estimate the forest age of China.

| Data type                 | Data source                                                                                                                                                                                                                                                            | Resolution    | Time          | Variables                    |
|---------------------------|------------------------------------------------------------------------------------------------------------------------------------------------------------------------------------------------------------------------------------------------------------------------|---------------|---------------|------------------------------|
| Remote sensing images     | Landsat TM/ETM+/OLI                                                                                                                                                                                                                                                    | 30m           | 1985–<br>2020 | NBR                          |
| Forest mask               | Planted and natural forest map (Cheng et al., 2023a)                                                                                                                                                                                                                   | 30m           | 2020          | Planted and natural forest   |
| Forest canopy height data | NNGI-Forest Canopy Height                                                                                                                                                                                                                                              | 30m           | 2019          | Forest height                |
| Climate data              | WorldClim version 2.1 (Fick and Hijmans 2017)                                                                                                                                                                                                                          | 1 km          | 1970–<br>2000 | PC1, PC2, PC3                |
| Soil data                 | Harmonized World Soil Database V1.2( <a href="https://www.fao.org/soils-portal/data-hub/soil-maps-and-databases/harmonized-world-soil-database-v12/en/">https://www.fao.org/soils-portal/data-hub/soil-maps-and-databases/harmonized-world-soil-database-v12/en/</a> ) | 30 arc-second | 1971–<br>1981 | Soil type, soil texture      |
| Topographic data          | SRTM DEM                                                                                                                                                                                                                                                               | 30 m          | 2000          | Elevation, slope, and aspect |

137

### 138 2.2 Forest age estimation

139 To generate the forest age map for China and explore the performance of MLAs to retrieve forest age, we applied two  
140 approaches to estimate forest age in China: the LandTrendr detection approach and the MLA-based approach. First, the  
141 LandTrendr was applied to detect stand-replacing disturbances based on the Landsat time series images. Second, the MLA-  
142 based method estimated ages for undisturbed forest regions within Landsat time series data. Here, we assumed that undisturbed  
143 forests over the Landsat record (before 1985) have the similar structural and spectral features to natural forests. Figure 2 shows  
144 a detailed flowchart describing the framework for forest age estimation proposed in this study.

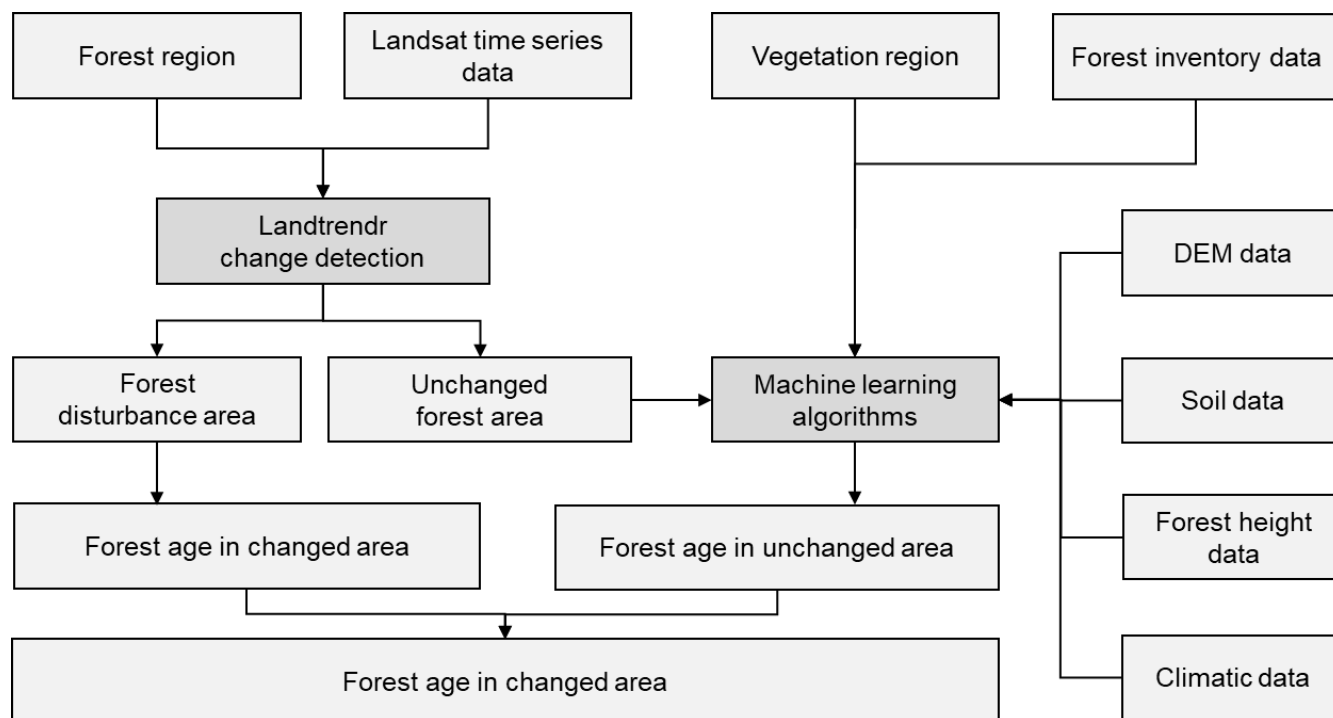

145

146 **Figure 2.** Framework of China's forest age estimation.

147

### 148 2.2.1 LandTrendr detection approach

149 LandTrendr was designed to detect and analyse changes in surface features, particularly disturbances and recovery processes,  
150 and is commonly applied to multispectral remote sensing imagery from the Landsat satellite series to capture long-term forest  
151 disturbances (Du et al., 2022). Using LandTrendr to detect forest age involves the following steps:

152 (1) Time series data transformation. LandTrendr transforms multiple temporal remote-sensing image datasets into a series of  
153 indices, such as the NBR.

154 (2) Breakpoint detection. Using the generated time series indices, LandTrendr retraces from the state in 2020 in search of  
155 breakpoints in the time series. These breakpoints signify transition points in the time series, which indicate instances of surface  
156 disturbance or recovery.

157 (3) Age estimation. By pinpointing breakpoints, the time of occurrence for each breakpoint is established. Forest age estimates  
158 for the current location are accomplished by subtracting the breakpoint time from the latest time.

159 LandTrendr was implemented on the GEE platform by using the function of *runLT()* provided by the LT\_GEE API (Kennedy  
160 et al., 2018). Table 1 lists the main input parameters.

161 **Table 1.** Parameters of LandTrendr used in this study.



| Parameters             | Definition                                                                                                                                                          | Value |
|------------------------|---------------------------------------------------------------------------------------------------------------------------------------------------------------------|-------|
| maxSegments            | Maximum number of segments to be fitted on the time series                                                                                                          | 10    |
| spikeThreshold         | Threshold for dampening the spikes (1.0 means no dampening)                                                                                                         | 0.9   |
| vertexCountOvershoot   | The initial model can overshoot the maxSegments + 1 vertices by this amount. Later, it will be pruned down to maxSegments + 1                                       | 3     |
| preventOneYearRecovery | Prevent segments that represent one-year recoveries                                                                                                                 | False |
| recoveryThreshold      | If a segment has a recovery rate faster than 1/recovery threshold (in years), then the segment is disallowed                                                        | 0.25  |
| pvalThreshold          | If the $p$ -value of the fitted model exceeds this threshold, then the current model is discarded and another one is fit by using the Levenberg–Marquardt optimizer | 0.05  |
| bestModelProportion    | Takes the model with most vertices that has a $p$ -value that is at most this fraction away from the model with the lowest $p$ -value                               | 0.75  |
| minObservationsNeeded  | Minimum observations required to perform output fitting                                                                                                             | 6     |

162

## 163 2.2.2 Machine learning approach

### 164 (1) MLA selection

165 This study used the following model-screening procedure to explore which model works best for each vegetation division.  
 166 First, we used the automated machine learning (Auto-ML) open-source Python library LazyPredict to filter for alternative  
 167 models. LazyRegressor (including 40 MLAs) was used to build stand-age estimation models based on all data, which helps to  
 168 understand which MLA works well without tuning parameters. The performing models with  $R^2$  greater than 0.60 in each  
 169 vegetation division were concentrated in thirteen MLAs (Supplementary Table 2). Second, by splitting training data and testing  
 170 data, the top three MLAs for each vegetation division were determined (Supplementary Table 2). It can be found that the  
 171 potential optimal models of eight vegetation divisions is concentrated in RF, Gradient Boosting Decision Tree (GBDT),  
 172 Histogram Gradient Boosting (HistGradientBoost), Light Gradient Boosting Machine (LightGBM), and Categorical Boosting  
 173 (CatBoost).

174 RF is an ensemble learning method that combines multiple decision trees (Breiman 2001; Dutta et al., 2020). It leverages the  
 175 wisdom of crowds to make accurate predictions. RF mitigates overfitting and provides robust results by training each tree on  
 176 a random subset of the data and features (Lavanya et al., 2017; Guo et al., 2019). GBDT is an ensemble technique that builds





177 a strong predictive model by sequentially training decision trees (Jerome 2001). Each tree corrects the errors of its predecessor  
178 (Wei et al., 2019), resulting in a highly accurate and robust model. HistGradientBoost is a variant of GBDT that employs  
179 histogram-based techniques. It efficiently approximates data distributions and reduces memory consumption during training.  
180 This algorithm is particularly beneficial when dealing with large datasets and complex features (Tesfagergish et al., 2022).  
181 LightGBM is a gradient-boosting framework that prioritizes speed and efficiency. It employs a histogram-based approach and  
182 parallel computing, making it suitable for large datasets. CatBoost is a new modification gradient boosting algorithm that is  
183 designed specifically for handling categorical features. It automatically encodes categorical variables, simplifying the data pre-  
184 processing stage. CatBoost is known for its robustness and efficiency, can achieve high accuracy on a small-scale dataset.  
185 We implemented RF, GBDT, and HistGradientBoost by using the Scikit-learn package of Python 3.9.11, while the LightGBM  
186 and CatBoost algorithms were constructed by using the lightgbm and catboost packages of Python 3.9.11.

## 187 (2) Hyperparameter tuning

188 Hyperparameter tuning of MLAs is critical in the ML model training process because it significantly enhances the model's  
189 performance, generalization capability, and adaptability (Sandha et al., 2020). Bayesian optimization has been selected for  
190 hyperparameter tuning due to its complicated derivative evaluation, and nonconvex-function-related features (Mekruksavanich  
191 et al., 2022). It is implemented by using Optuna, an open source hyperparameter optimization framework to automate  
192 hyperparameter searches (Akiba et al., 2019). The hyperparameters and their searching range in MLAs are listed in  
193 Supplementary Table 2.

## 194 (3) Model interpretation

195 Furthermore, we used Shapley Additive explanations (SHAP) values (Lundberg and Lee, 2017; Lundberg et al., 2019), a  
196 model-agnostic technique for interpreting ML models, to explore functional correlations between the variables and forest age  
197 (Besnard et al. 2021). SHAP derives the Shapely additive contribution values from coalitional game theory (Kim et al. 2023).  
198 By examining the contribution of each input variable to the model's output, SHAP can identify the primary drivers of the  
199 model's predictions and provide insights into the underlying causes that influence forest age (Sun et al. 2023). The higher the  
200 SHAP value, the larger the contribution of the variable. Here we calculated SHAP value using *shap* package in Python.

## 201 2.3 Accuracy assessment

202 We collected three independent data samples to validate the generated forest age map. The first is the forest inventory data  
203 independent of training data. The second source involved validation samples obtained from the literature. To ensure the  
204 samples collected were representative, we excluded samples with collection dates prior to 2010. The third source was the  
205 existing forest age products. As validation metrics, we used the coefficient of determination ( $R^2$ ), the root mean square error  
206 (RMSE), the mean absolute error (MAE), and the mean error (ME). These are given mathematically as

$$R^2 = 1 - \frac{\sum_{i=1}^n (y_i - \hat{y}_i)^2}{\sum_{i=1}^n (y_i - \bar{y})^2}, \quad (2)$$



$$RMSE = \sqrt{\frac{1}{n} \sum_{i=1}^n (y_i - \hat{y}_i)^2}, \quad (3)$$

$$MAE = \frac{1}{n} \sum_{i=1}^n |y_i - \hat{y}_i|, \quad (5)$$

$$ME = \frac{\sum_{i=1}^n (y_i - \hat{y}_i)}{n}, \quad (6)$$

207 where  $y_i$  is the observed value for the  $i$ th analytic tree,  $\hat{y}_i$  is the predicted value of the  $i$ th observed value,  $n$  is the number of  
 208 trees, and  $\bar{y}_i$  is the mean of the observed value.

### 209 3 Results

#### 210 3.1 MLA performance for China's forest age estimation

211 Through a rigorous hyperparameter-optimization process and independent validation, four distinct MLAs (RF, GBDT,  
 212 LightGBM, and CatBoost) were selected across eight different vegetation divisions (Table 2). GBDT performed exceptionally  
 213 well for estimating the forest age of cold temperate needleleaf forest (CT) vegetation zone, producing  $R^2$  of 0.47 and RMSE  
 214 of 4.95 years (MAE=17.99, ME=-1.86). RF excelled at estimating the forest age of warm temperate deciduous-broadleaf forest  
 215 (TD) vegetation zone, producing an independent validation  $R^2$  of 0.61 and RMSE of 3.47 years (MAE=9.13, ME=-0.01).  
 216 CatBoost consistently demonstrated strong performance for the Qinghai-Tibet Plateau alpine vegetation (QT), tropical  
 217 monsoon forest-rainforest (TM), temperate steppe (TS), temperate desert (TD), and subtropical evergreen broadleaf forest (SE)  
 218 zones, with  $R^2$  values ranging from 0.57 to 0.85 and RMSE values from 2.04 to 7.65 years. LGBMRegressor was the preferred  
 219 choice in the temperate needleleaf-broadleaf mixed forest (TN) vegetation division, yielding an  $R^2$  of 0.63 and an RMSE of  
 220 4.14 years.

221 **Table 2.** MLA for eight vegetation divisions and their validation metrics.

| Vegetation division | Algorithm     | $R^2$ | RMSE | MAE   | ME    |
|---------------------|---------------|-------|------|-------|-------|
| CT                  | GradientBoost | 0.46  | 4.95 | 17.99 | -1.86 |
| WT                  | RF            | 0.61  | 3.47 | 9.13  | -0.01 |
| QT                  | CatBoost      | 0.57  | 7.65 | 42.58 | 10.43 |
| TM                  | CatBoost      | 0.85  | 2.04 | 1.34  | -0.08 |
| TS                  | CatBoost      | 0.78  | 4.16 | 11.85 | -0.87 |
| TD                  | CatBoost      | 0.80  | 5.33 | 21.02 | 1.84  |
| TN                  | LGBM          | 0.63  | 4.14 | 12.78 | 0.36  |
| SE                  | CatBoost      | 0.70  | 3.49 | 7.97  | 0.00  |

WT?



222

223 We further analysed the factors influencing the forest age estimation in each vegetation division, and the findings are illustrated  
224 in [Figure 3](#). While the prioritization of factors affecting forest age estimation varies across different vegetation divisions,  
225 canopy height is unquestionably the predominant factor influencing this estimation. Its absolute value is the highest of the CT,  
226 WT, TN, TS, and TM vegetation zones ([Figure 3](#)). Moreover, it is among the top three most influential factors in all the  
227 remaining vegetation zones. Subsequently, topographical conditions assume prominence, with elevation consistently featuring  
228 among the top three factors in the SHAP value across all vegetation divisions. In the TD vegetation division, elevation becomes  
229 the most influential factor. Climate factors earn third-tier consideration, particularly in the SE vegetation zone, where the  
230 impact of PC2 of the climate factors surpasses that of both canopy height and topographical conditions. In the other vegetation  
231 divisions, the influence of climate factors generally falls to the mid-range. In contrast, across all eight vegetation divisions,  
232 factors related to soil, such as soil type and soil texture, do not exert a pronounced influence on forest age estimation.

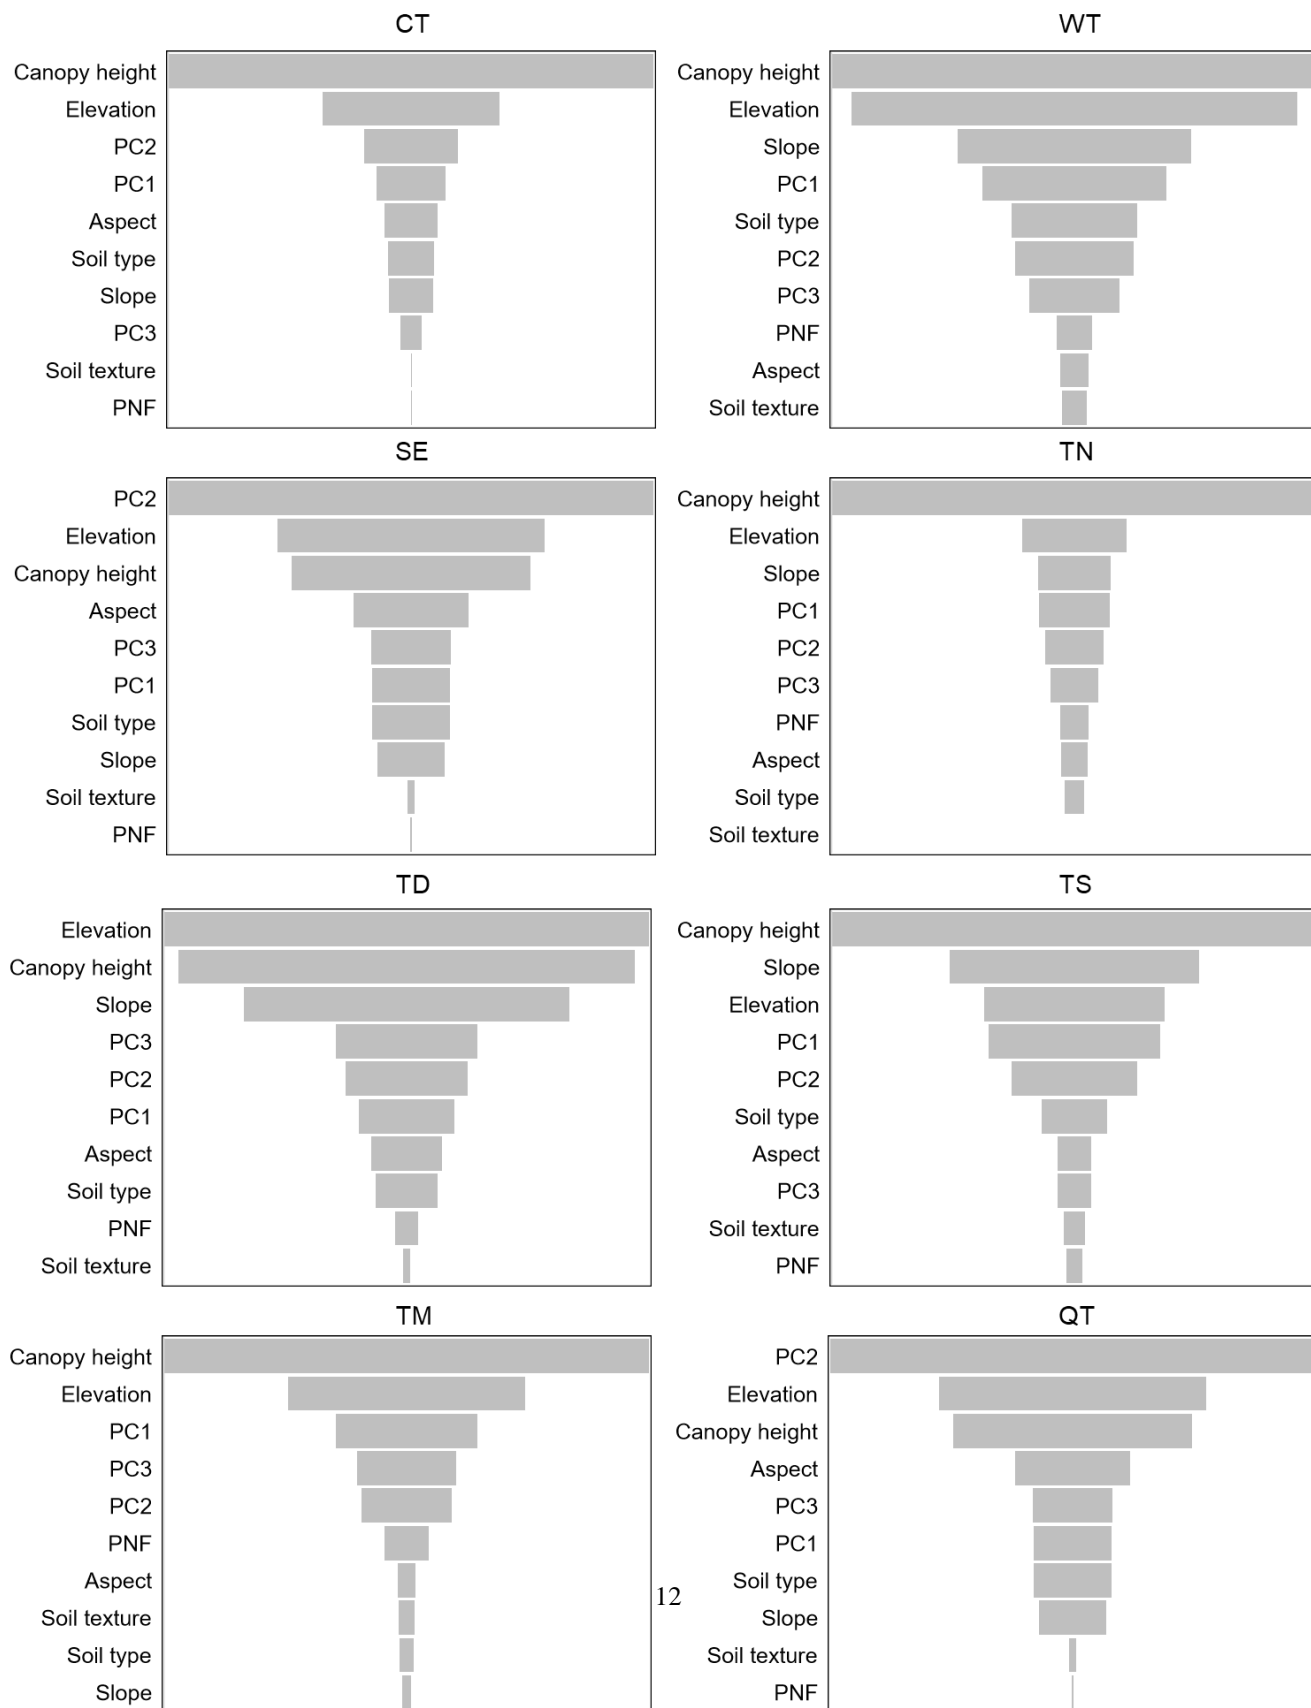



234 **Figure 3.** Order of shape values of factors affecting the estimation of forest age in different vegetation zones

### 235 3.2 China's forest age map

236 China's 30 m resolution forest-age map is presented in [Figure 4](#). The mean of the estimated forest age is 56.11 years with a  
237 standard deviation of 32.67 years. Geographically, forests in northeast and southwest China are relatively older than those in  
238 other regions ([Figure 4](#)). At the provincial scale, the average forest age ranges from 3.9 to 116.8 years ([Figure 5a](#),  
239 [Supplementary Table 5](#)), whereas Qinghai province has the highest mean forest age, and Hong Kong has the lowest mean  
240 forest age. Forest ages in Sichuan province are more varied than in other provinces ([Figure 5a](#)). On the regional scale, the QT  
241 vegetation zones have the oldest forests with an average of 138.0 years, followed by CT (107.6 years), TS (107.0 years), TN  
242 (68.3 years), TD (60.3 years), TM (53.0 years), and SE (49.2 years) ([Figure 5b](#), [Supplementary Table 6](#)). The WT vegetation  
243 zones have the youngest forests (28.5 years).

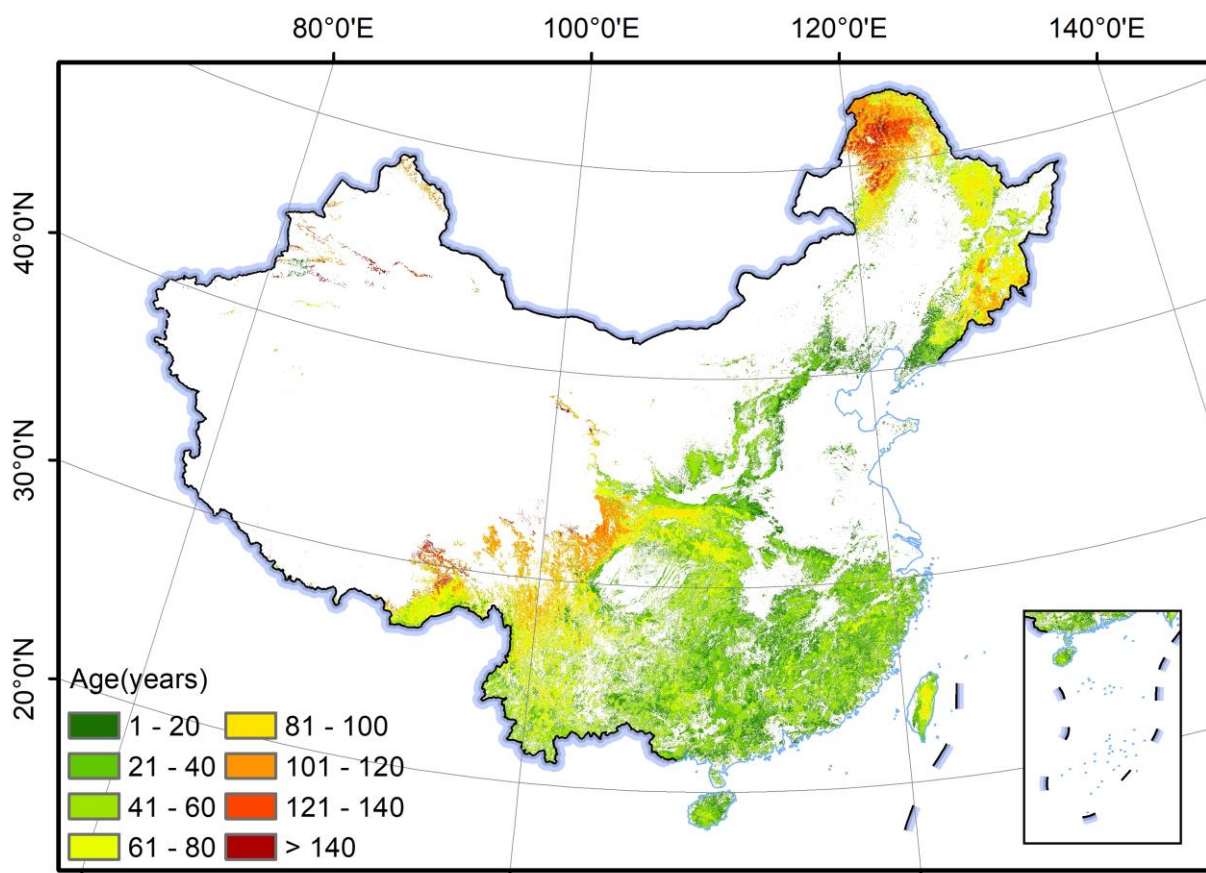

244

245 **Figure 4.** Distribution of China's forest age with 30 m resolution.

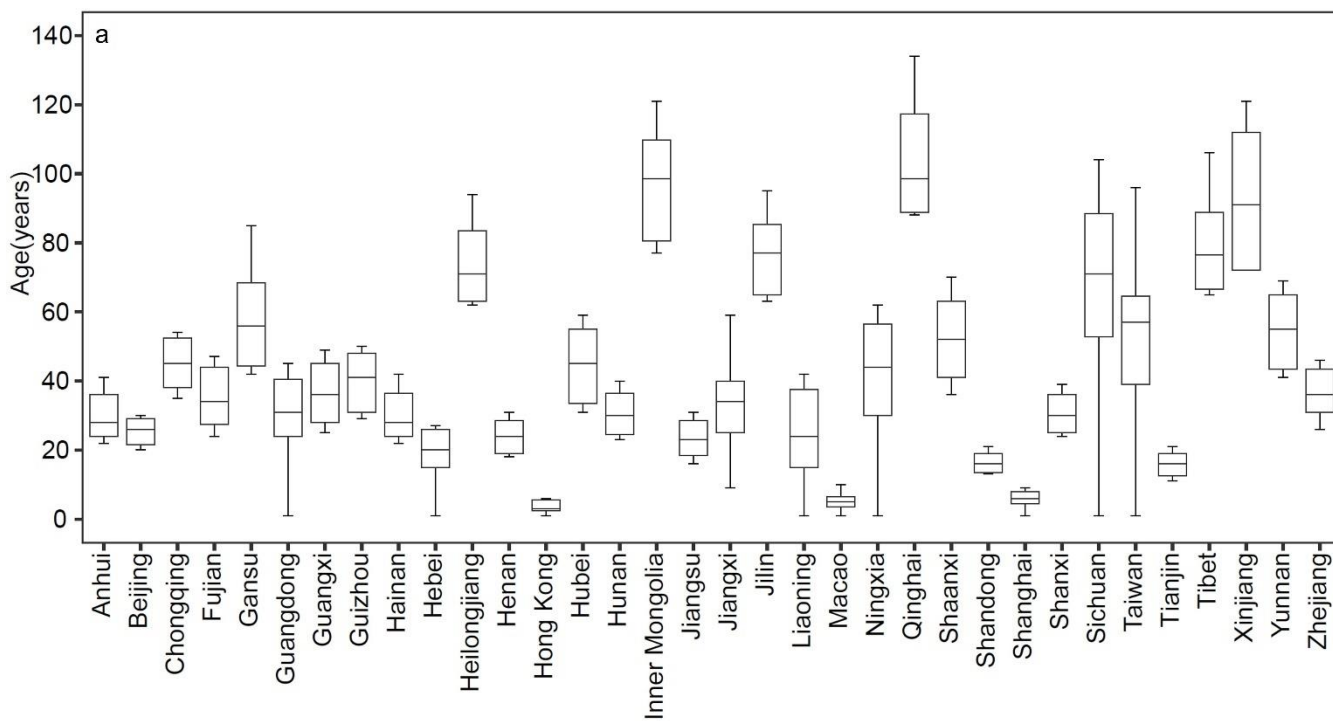

246

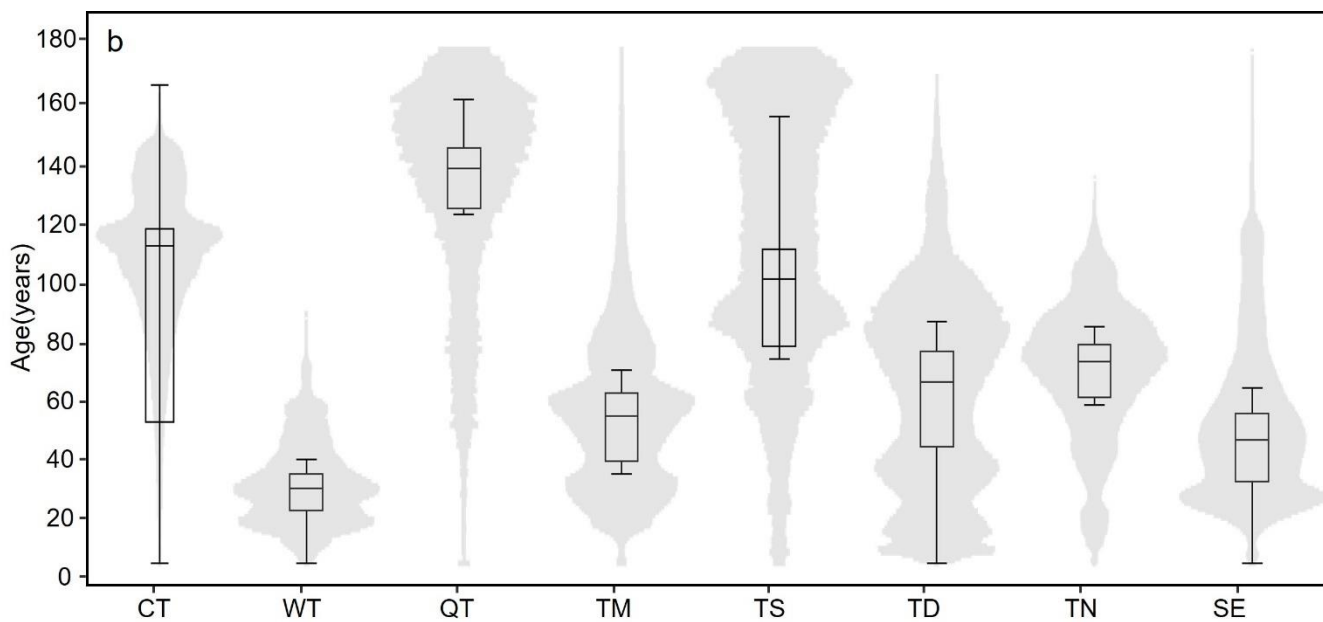

247

248

249 **Figure 5.** Mean forest age on the (a) provincial and (b) regional scales.

error bars mean?



### 250 3.3 Evaluation

2004?

251 We used three independent data sources to evaluate the final forest age map, including forest inventory samples from 2003 to  
252 2008, field measurements collected from published papers, and existing remote sensing based forest age products.

#### 253 3.3.1 Comparison with forest inventory samples

254 We initially validated the forest age estimations by using forest inventory data. The forest inventory samples were acquired  
255 from 2003 to 2008. To align with the time frame of the forest age data obtained in this study, we shifted the predicted values  
256 corresponding to each sample forward by ~16 years. This strategy allows us to compare them with the inventory-measured  
257 forest ages. Figure 6a shows the comparison, which suggests that they have a significant linear relationship with  $R^2 = 0.51$   
258 (Figure 6a).

#### 259 3.3.2 Comparison with field measurements

260 We collected 99 field measurements of mean forest stand age after 2010 from published papers (Supplementary Table 7) and  
261 compared them with our estimated results. Figure 6b shows that the predicted forest ages also present a significant linear  
262 relationship with field measurements, with  $R^2 = 0.62$ .

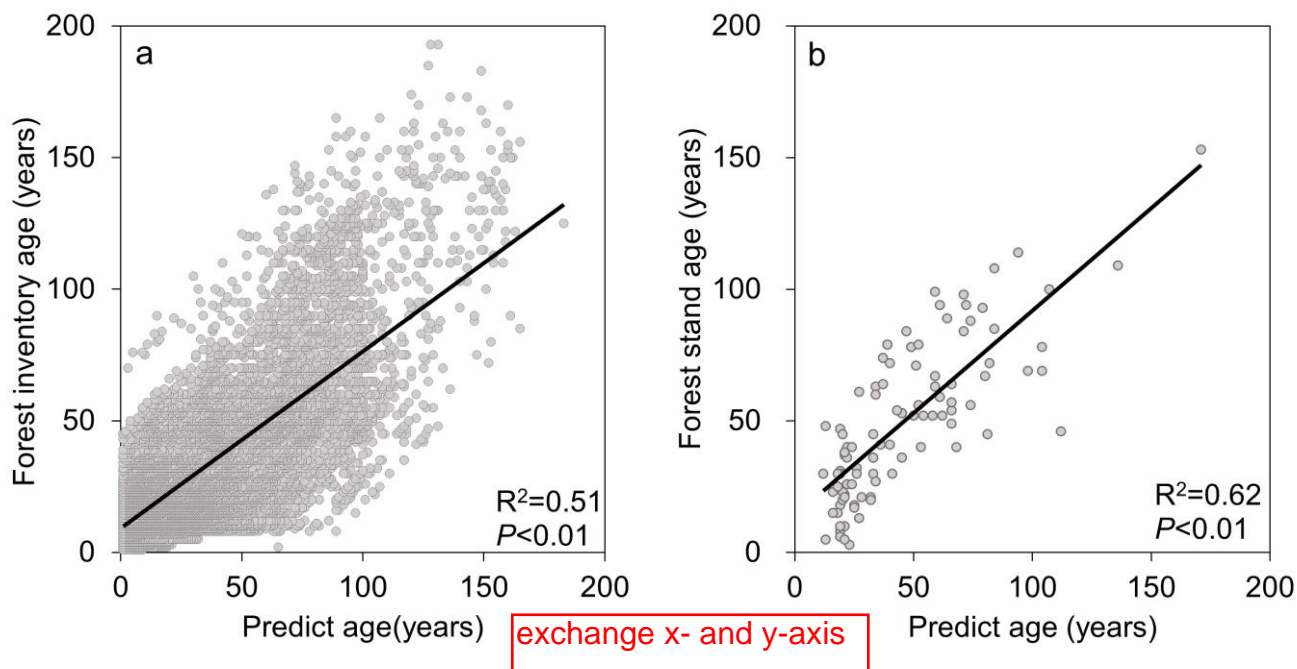

263

264 **Figure 6.** Scatter plots of (a) forest inventory age vs predicted forest age for this study and (b) field measurements of forest stand age  
265 collected from published papers vs predicted forest.



### 266 3.3.3 Comparison with existing forest age products

267 We compared our estimated forest age map with an independent global forest age data product produced by Besnard et al.  
268 (2021a). Figure 7 shows the difference between these two maps, which suggests an average difference of 9.7 years. Our mapped  
269 forest age is older in northeast regions but younger forests in the middle regions than that from Besnard et al. (2021a) dataset.  
270 In addition, we gathered the existing remote sensing based forest age maps over China from published datasets and compared  
271 their average forest age with our estimation (Table 3). According to the available data, the average forest age in China ranged  
272 from 40 to 43 years between 2000 and 2013, corresponding to approximately 50 to 53 years in 2020. This aligns closely with  
273 the average forest age of 56.1 years obtained in this study for the year of 2020, further underscoring the reliability of the forest  
274 age mapped in this study.

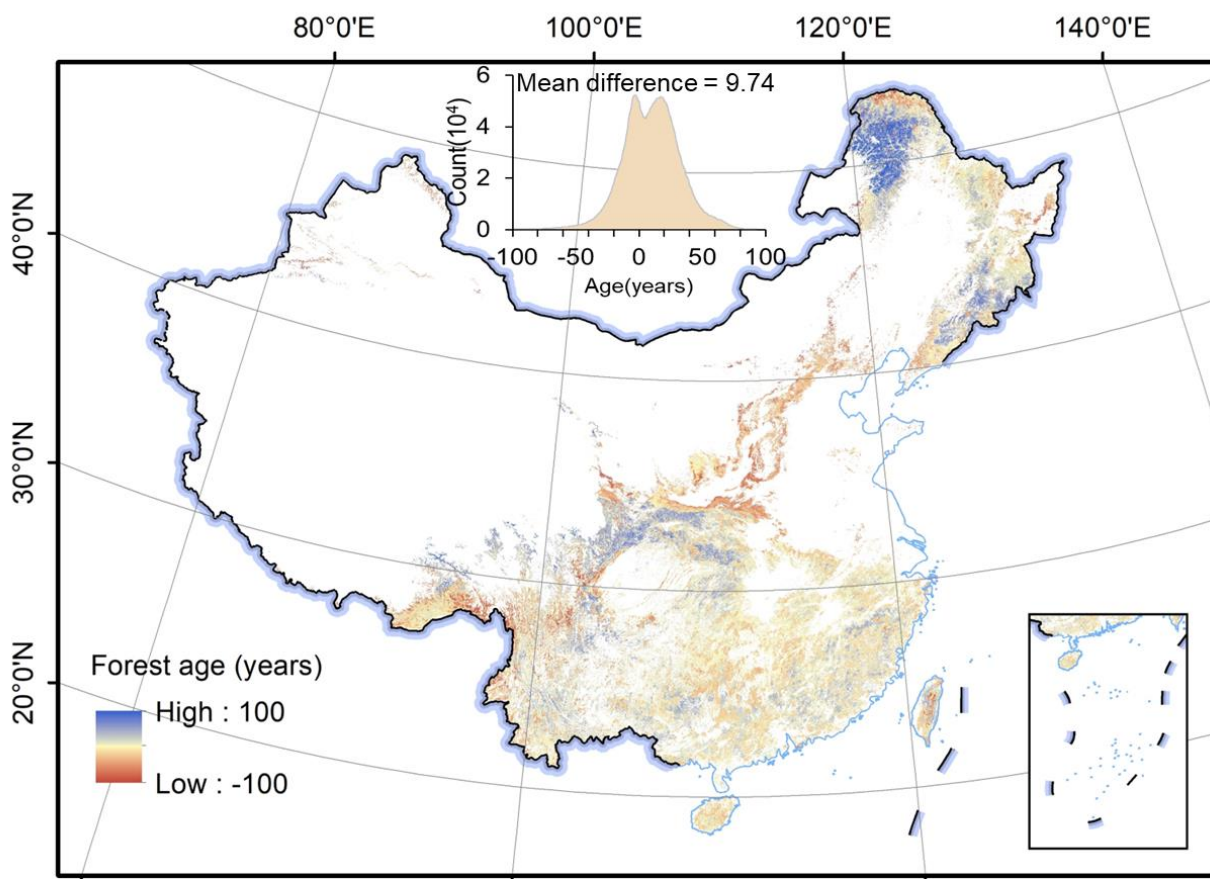

275  
276 **Figure 7.** Comparison with global forest age product. The inset at the top left shows the frequency distribution of differences between the  
277 global forest age map and our estimated forest age map.

278 **Table 3.** China's mean forest age collected from published papers.





| Source              | Mean forest age (years) | Resolution | Mapping year |
|---------------------|-------------------------|------------|--------------|
| Zhang et al. (2017) | 42.6                    | 1 km       | 2013         |
| Zhang et al. (2014) | 43                      | 1 km       | 2005         |
| Dai Ming (2011)     | 40.6                    | 8 km       | 1998         |
| Wang et al. (2007)  | <40                     | 1 km       | 2001         |
| Xia et al., 2023    | 44.0                    | 1 km       | 2015         |
| This study          | 56.1                    | 30 m       | 2020         |

279

#### 280 4 Discussion

281 A high-spatial resolution forest age map is an important input for accurately quantifying forest carbon storage and potential.  
282 Although several forest age maps for China were generated in the most recent decades, their spatial resolution is coarser,  
283 ranging from 1 to 8 km (e.g., Zhang et al., 2014; Zhang et al., 2017), which does not satisfy the application requirements for  
284 local-to-regional scales (Xiao et al., 2023). Therefore, we generated a 30 m resolution forest age map of China using remote  
285 sensing and inventory data for 2020. Validation against independent forest inventory samples, field measurements collected  
286 from published papers, and existing forest age products indicate that the estimated forest age map has  $R^2$  of 0.51 to 0.62, and  
287 presented well spatial agreement with the existing forest age product. Such a high-resolution and timely forest age dataset is  
288 vital to assess ecological benefits of China's forests and to manage forest resources for sustainable development.

289 The generated forest age map indicates that 40.08% of forests are younger than 40 years, 38.11% are 41–80 years old, and  
290 21.81% are over 80 years old. This result indicates that most forests in China are young, which is consistent with the findings  
291 of Zhang et al. (2017) and Zhang et al. (2014), even though the specific proportions might vary slightly, which is mainly  
292 because they produced forest age distribution data for the year of 2005, whereas our data represents forest age in 2020.  
293 Furthermore, similar to Zhang et al. (2017) and Zhang et al. (2014), forests younger than 40 years are primarily in southern  
294 and eastern China, whereas forests older than 80 years are predominantly in northeastern and southwestern China (Figure 4).  
295 We further analyse the forest age by using China's planted and natural forest mask generated by Cheng et al. (2023) for 2020.  
296 The results reveal that the average forest age for planted forests in China is 29.1 years with a standard deviation of 18.2 years,  
297 whereas natural forests have an average age of 69.7 years with a standard deviation of 30.6 years. This result aligns closely  
298 with the reported 16.5 years for China's planted forests in 2005 (which equates to approximately 31 years in 2020) by Yu et  
299 al. (2020b).

300

301 This study combines two methods to estimate forest age across China. The first method uses time-series remote sensing  
302 imagery and the LandTrendr algorithm to detect pixels that changed within the forest extent from 1985 to 2020. The forest age  
303 was estimated according the time since the last disturbance serving as a proxy for forest age. This approach has been



304 extensively used to estimate forest age and is generally acknowledged to be accurate and reliable for detecting disturbance  
305 (Hermosilla et al., 2016). For instance, Du et al. (2022) used the LandTrendr algorithm to detect planting times of global  
306 planted forests, and Xiao et al. (2023) estimated the forest age of young forests in China since 1984 by using the CCDC time-  
307 series algorithm. These successful cases validate the feasibility of using time-series change-detection algorithms to estimate  
308 the age of disturbed forests. In this study, we compared our change-detection derived forest age with the age of young forests  
309 provided by Xiao et al. (2023) (Figure 8). These two outcomes have a mean difference of  $-3.79$  years (Figure 8a) and have a  
310 significant linear relationship with  $R^2 = 0.53$  (Figure 8b). However, this approach only detects the forest age of disturbed areas  
311 based on Landsat images; for undisturbed forests, we propose using nonparametric MLAs to estimate forest age. Additionally,  
312 considering China's abundant forest resources, wide distribution, and complex terrain, this study proposes an approach to  
313 study forest-age estimation models based on MLAs.

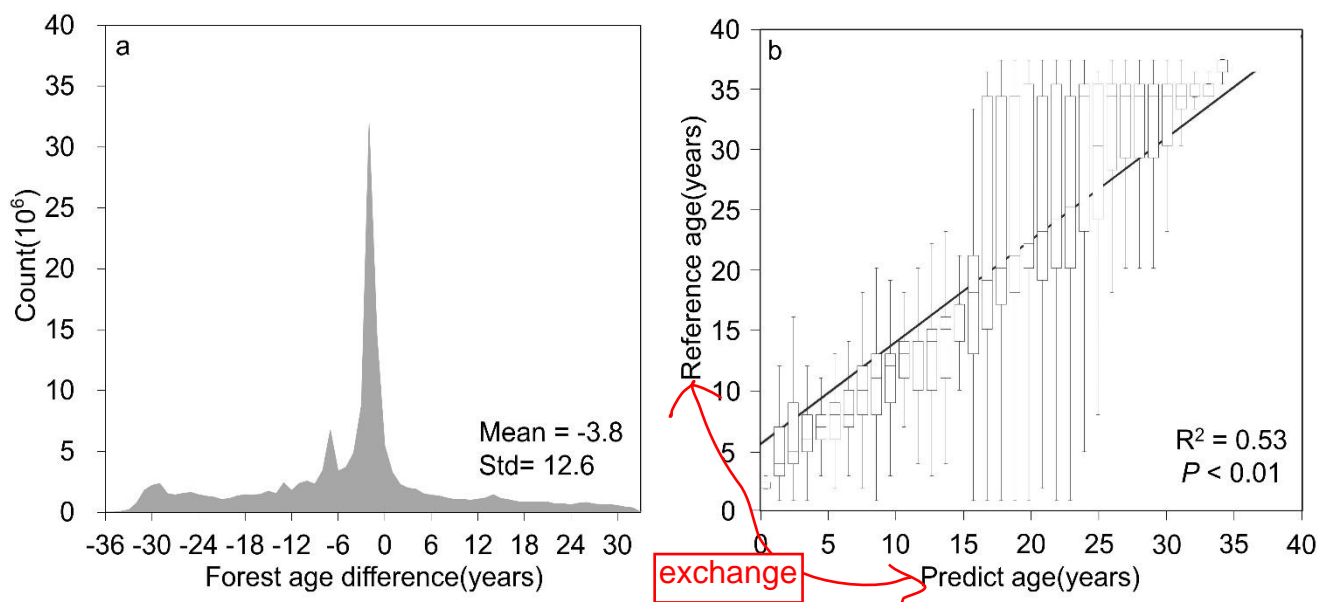

314  
315 **Figure 8.** (a) Age difference and (b) linear relationship between estimated forest age and China's Young Forest Age dataset generated by  
316 Xiao et al. (2023).

317 We investigate in-depth the suitability of current mainstream MLAs for estimating forest age. For each vegetation division,  
318 we establish the optimal MLA and its optimal parameters (Table 2, Supplementary Table 3). Of the established MLAs, the  
319 ensemble learning approaches perform best for both training and evaluation compared with individual-based learners. Several  
320 previous studies support the idea that ensemble techniques have achieved better performance than that of its base learners (e.  
321 g. Rodriguez et al., 2006; Banfield et al., 2007; Canul-Reich et al., 2007; Rokach, 2009; De Stefano et al., 2011; Matloob et  
322 al., 2021). Bagging and boosting are two mainstream ensemble techniques in ensemble learning that combine multiple base  
323 models to improve predictive performance. Bagging reduces variance, whereas boosting reduces bias and improves overall  
324 model performance (Abbasi et al., 2022). However, most previous studies focus on bagging-based RF models to derive forest



325 structure parameters in remote sensing fields (Simard et al., 2011; Cartus et al., 2012; Montesano et al., 2013; Matasci et al.,  
326 2018; Luther et al., 2019; Bolton et al., 2020). The present study highlights that super ensemble learning algorithms based on  
327 boosting, including GBDT, LightGBM, and CatBoost, demonstrate higher accuracy in estimating China's forest age compared  
328 to the bagging-based RF algorithm. Furthermore, within the current ensemble learning framework, the CatBoost algorithm  
329 based on boosting has a clear advantage for estimating forest age in China (Table 2). It produces optimal results in five  
330 vegetation zones and is as accurate as the best-performing algorithms in the remaining vegetation zones (Supplementary Table  
331 4). Therefore, we recommend giving priority to the utilization of the CatBoost algorithm in deriving the forest structural  
332 parameters in China.

333

334 In the process of machine learning modelling for forest age estimation, we selected a total of 10 features, including canopy  
335 height, meteorological factors, soil factors, terrain factors, and human activities. Factor analysis indicates that canopy height  
336 has significantly influence forest age modelling, which is consistent with previous research, such as Zhang et al. (2017), who  
337 estimated forest age in China based on the relationship between canopy height and forest age. The main reason is that canopy  
338 height is typically correlated with the growth period (Sharma and Parton, 2007; Schumacher et al., 2020b; Lin et al., 2023).  
339 Young trees usually have shorter canopy height and, as trees age, canopy height gradually increases (Yu et al., 2020b).  
340 Therefore, canopy height gives clues about tree age, and many age-estimation models are based on forest height (Lin et al.,  
341 2023). Terrain conditions also play important roles in all vegetation zones, especially the elevation and slope features (Figure  
342 2). This is mainly because terrain factors are closely related to vegetation distribution, growth conditions, and hydrological  
343 processes (Fernández-Martínez et al., 2014) and affecting forest age estimation (Lin et al., 2008). Climate factors, including  
344 temperature and precipitation, also play a significant role in estimating forest age and have been applied to estimate global  
345 forest age (Besnard et al., 2021a). Climate elements are most pronounced in the SE and QT vegetation zones because these  
346 two zones belong to areas with extreme climates and pronounced seasonal variations (Zhang et al., 2018). The SE region has  
347 a warm and humid climate with abundant rainfall (Zhang et al., 2018), which aligns with seasonal growth, making it influential  
348 in forest age estimation. The QT region experiences extreme temperature fluctuations, with extremely cold winters and short  
349 and cool summers, significantly affecting tree growth rates and cycles (Zhang et al., 2021). Although soil and human activities  
350 seem to have a relatively smaller impact in this study, the high accuracy achieved in this study is attributed to the combined  
351 contributions of all factors.

352

353 Overall, we produce a reliable forest age map for China. This forest age product has been validated by independent field  
354 samples and compared against existing datasets with a  $R^2$  ranging from 0.51 to 0.62 (Figure 6). However, it is imperative to  
355 acknowledge that intrinsic uncertainties arise from data-related constraints. Primarily, the utilization of forest mask that  
356 delineate planted and natural forests introduces an inescapable source of uncertainty, which is particularly high (approximately  
357 10%) in the southern regions of China (Cheng et al., 2023a). Furthermore, the dependence on canopy-height data generated  
358 by Liu et al. (2022) as the crucial determinant in forest age estimation (Figure 2) necessitates meticulous consideration (Zhang

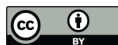

359 [et al., 2017](#)), giving the uncertainties in the canopy-height data ( $R^2=0.55$ ) could strongly affect the accuracy in forest age  
360 modelling. Finally, when benchmarked against extant products, conspicuous disparities in forest age estimates appear within  
361 the northeastern and southwestern regions ([Figure 6](#)). These disparities, coupled with insights from forest inventory data,  
362 highlight the prevalence of older forests (exceeding 100 years) within these regions ([Figures 1 and 4](#)). The unique challenge  
363 posed by estimating the age of such older forests, characterized by sluggish growth rates ([Maltman et al., 2023b](#)), accentuates  
364 the sensitivity to crown height data. Consequently, the uncertainty associated with canopy height data is conspicuously  
365 accentuated in these regions.

## 366 **5 Data availability**

367 The 30 m resolution forest age map of China generated by this study is openly available at  
368 <https://doi.org/10.5281/zenodo.8354262> ([Cheng et al., 2023b](#)). Please contact the authors for more detailed information ,

## 369 **6 Conclusion**

370 High-resolution and spatially explicit forest age mapping for China play a crucial role in accurately quantifying the current  
371 carbon sequestration of forest ecosystems and its potential in the future. Currently, publicly available China's forest age data  
372 suffer from low resolution and incomplete coverage of age ranges, making it difficult to meet the requirements of studies at  
373 various spatial scales. Therefore, this study combines time-series analysis of remote sensing imagery with MLAs to create the  
374 first 30 m resolution China's forest age map for the year of 2020. Validation against forest inventory data, field measurements,  
375 and existing products demonstrates the  $R^2$  values between 0.51 and 0.62. The estimated forest age data reveal an average forest  
376 age of 56.1 years for China, with a standard deviation of 32.7 years. This dataset holds significant importance for understanding  
377 the carbon source and sink dynamics in China's forest ecosystem.

378

## 379 **Author contributions**

380 KC, YC and QG designed the research. KC, YC, TX performed the analysis, KC and YC wrote the paper. QG, HY, and QM  
381 supervised and reviewed the paper. HG and YR reviewed the manuscript. QG, KC, YC, WL collected the field measurements  
382 and existing remote sensing products. KC and YC contributed equally to this work.

## 383 **Competing interests**

384 The contact author has declared that none of the authors has any competing interests.



## 385 Acknowledgements

386 We would like to thank the editor and the two reviewers for their valuable comments.

387

## 388 Financial support

389 This research has been supported by the National Key Research and Development Program of China (grant no.  
390 2022YFF130203), the International Research Center of Big Data for Sustainable Development Goals (grant no.  
391 CBAS2022GSP06), the National Natural Science Foundation of China (grant no. 42371329 and 31971575).

## 392 References

- 393 Abbasi, E., M. R. Alavi Moghaddam, and E. Kowsari. A systematic and critical review on development of machine learning  
394 based-ensemble models for prediction of adsorption process efficiency. *J. Clean. Prod.*, 379:134588,  
395 <https://doi.org/10.1016/j.jclepro.2022.134588>, 2022
- 396 Akiba, T., S. Sano, T. Yanase, T. Ohta, and M. Koyama. Optuna: A Next-generation Hyperparameter Optimization Framework.  
397 Pages 2623–2631 Proceedings of the 25th ACM SIGKDD International Conference on Knowledge Discovery & Data  
398 Mining. Association for Computing Machinery, Anchorage, AK, USA. <https://doi.org/10.48550/arXiv.1907.10902>, 2019.
- 399 Alerskans, E., A.-S. P. Zinck, P. Nielsen-Englyst, and J. L. Høyer. Exploring machine learning techniques to retrieve sea  
400 surface temperatures from passive microwave measurements. *Remote Sens Environ.*, 281:113220,  
401 <https://doi.org/10.1016/j.rse.2022.113220>, 2022.
- 402 Banfield, R. E., L. O. Hall, K. W. Bowyer, and W. P. Kegelmeyer. A Comparison of Decision Tree Ensemble Creation  
403 Techniques. *IEEE Trans. Pattern Anal. Mach. Intell.*, 29:173-180, <https://doi.org/10.1109/TPAMI.2007.250609>, 2007.
- 404 Besnard, S., S. Koirala, M. Santoro, U. Weber, J. Nelson, J. Gutter, B. Herault, J. Kassi, A. N’Guessan, C. Neigh, B. Poulter,  
405 T. Zhang, and N. Carvalhais. Mapping global forest age from forest inventories, biomass and climate data. *Earth Syst. Sci.*  
406 *Data.*, 13:4881-4896, <https://doi.org/10.5194/essd-13-4881-2021>, 2021a.
- 407 Bolton, D. K., P. Tompalski, N. C. Coops, J. C. White, M. A. Wulder, T. Hermosilla, M. Queinnec, J. E. Luther, O. R. van  
408 Lier, R. A. Fournier, M. Woods, P. M. Treitz, K. Y. van Ewijk, G. Graham, and L. Quist. Optimizing Landsat time series  
409 length for regional mapping of lidar-derived forest structure. *Remote Sens Environ.*, 239:111645,  
410 <https://doi.org/10.1016/j.rse.2020.111645>, 2020.
- 411 Breiman, L. Random Forests. *Machine Learning* 45:5-32, <https://doi.org/10.1023/A:1010933404324>, 2001.
- 412 Canul-Reich, J., L. Shoemaker, and L. O. Hall. Ensembles of Fuzzy Classifiers. Pages 1-6 in 2007 IEEE International Fuzzy  
413 Systems Conference. <https://doi.org/10.1109/FUZZY.2007.4295345>, 2007.



- 414 Cartus, O., J. Kellndorfer, M. Rombach, and W. Walker. Mapping Canopy Height and Growing Stock Volume Using Airborne  
415 Lidar, ALOS PALSAR and Landsat ETM+. *Remote Sens.*, 4:3320-3345, <https://doi.org/10.3390/rs4113320>, 2012.
- 416 Cheng, K., Y. Su, H. Guan, S. Tao, Y. Ren, T. Hu, K. Ma, Y. Tang, and Q. Guo. Mapping China's planted forests using high  
417 resolution imagery and massive amounts of crowdsourced samples. *ISPRS J. Photogramm. Remote Sens.*, 196:356-371,  
418 <https://doi.org/10.1016/j.isprsjprs.2023.01.005>, 2023a.
- 419 Cheng, K, Y, Chen, T, Xiang, H, Yang, W, Liu, Y, Ren, H, Guan, T, Hu, Q, Ma, and Qinghua Guo. 2020 forest age map for  
420 China with 30 m resolution (1.0) [Data set]. Zenodo. <https://doi.org/10.5281/zenodo.8354262>, 2023b.
- 421 Dai, M., T. Zhou, L. Yang, and G. Jia. Spatial pattern of forest ages in China retrieved from national-level inventory and  
422 remote sensing imageries. *GEOGRAPHICAL RESEARCH* 30:172-184, <https://doi.org/10.11821/yj2011010017>, 2011 (in  
423 Chinese).
- 424 De Stefano, C., F. Fontanella, G. Folino, and A. S. di Freca. A Bayesian Approach for Combining Ensembles of GP Classifiers.  
425 Pages 26-35. Springer Berlin Heidelberg, Berlin, Heidelberg. [https://doi.org/10.1007/978-3-642-21557-5\\_5](https://doi.org/10.1007/978-3-642-21557-5_5), 2011.
- 426 Du, Z., L. Yu, J. Yang, D. Coomes, K. Kanniah, H. Fu, and P. Gong. Mapping Annual Global Forest Gain From 1983 to 2021  
427 With Landsat Imagery. *IEEE J-STARS.*, 16:4195-4204, <https://doi.org/10.1109/JSTARS.2023.3267796>, 2023.
- 428 Du, Z., L. Yu, J. Yang, Y. Xu, B. Chen, S. Peng, T. Zhang, H. Fu, N. Harris, and P. Gong. A global map of planting years of  
429 plantations. *Scientific Data.*, 9:141, <https://doi.org/10.1038/s41597-022-01260-2>, 2022.
- 430 Dutta, K. K., S. S. A, A. Victor, A. G. Nathu, M. A. Habib, and D. Parashar. Kannada Alphabets Recognition using Decision  
431 Tree and Random Forest Models. Pages 534-541 in 2020 3rd International Conference on Intelligent Sustainable Systems  
432 (ICISS). <https://doi.org/10.1109/ICISS49785.2020.9315972>, 2020.
- 433 Fernández-Martínez, M., S. Vicca, I. A. Janssens, S. Luysaert, M. Campioli, J. Sardans, M. Estiarte, and J. Peñuelas. Spatial  
434 variability and controls over biomass stocks, carbon fluxes, and resource-use efficiencies across forest ecosystems. *Trees.*  
435 28:597-611, <https://doi.org/10.1007/s00468-013-0975-9>, 2014.
- 436 Guo, Y., Y. Zhou, X. Hu, and W. Cheng. Research on Recommendation of Insurance Products Based on Random Forest.  
437 Pages 308-311 in 2019 International Conference on Machine Learning, Big Data and Business Intelligence (MLBDBI).  
438 <https://doi.org/10.1109/MLBDBI48998.2019.00069>, 2019.
- 439 Hermosilla, T., M. A. Wulder, J. C. White, N. C. Coops, G. W. Hobart, and L. B. Campbell. Mass data processing of time  
440 series Landsat imagery: pixels to data products for forest monitoring. *Int J Digit Earth.*, 9:1035-1054,  
441 <https://doi.org/10.1080/17538947.2016.1187673>, 2016.
- 442 Jerome, H. F. Greedy function approximation: A gradient boosting machine. *Ann Stat.*, 29:1189-1232,  
443 <https://doi.org/10.1214/aos/1013203451>, 2001.
- 444 Kennedy, R. E., Z. Yang, N. Gorelick, J. Braaten, L. Cavalcante, W. B. Cohen, and S. Healey. Implementation of the  
445 LandTrendr Algorithm on Google Earth Engine. *Remote Sens.*, 10:691, <https://doi.org/10.3390/rs10050691>, 2018.



- 446 Kim, Hyunglok, Wade Crow, Xiaojun Li, Wolfgang Wagner, Sebastian Hahn, and Venkataraman Lakshmi. True global error  
447 maps for SMAP, SMOS, and ASCAT soil moisture data based on machine learning and triple collocation analysis. *Remote*  
448 *Sens Environ.*, 298: 113776, <https://doi.org/10.1016/j.rse.2023.113776>, 2023.
- 449 Lavanya, K., S. Bajaj, P. Tank, and S. Jain. Handwritten digit recognition using hoeffding tree, decision tree and random  
450 forests — A comparative approach. Pages 1-6 in 2017 International Conference on Computational Intelligence in Data  
451 Science (ICCIDS). <https://doi.org/10.1109/ICCIDS.2017.8272641>, 2017.
- 452 Lin, G., B. Xia, Z. Zeng, and W. Huang. The Relationship between NDVI, Stand Age and Terrain Factors of *Pinus elliottii*  
453 Forest. Pages 232-236 in 2008 International Workshop on Education Technology and Training & 2008 International  
454 Workshop on Geoscience and Remote Sensing. <https://doi.org/10.1109/ETTandGRS.2008.302>, 2008.
- 455 Lin, X., R. Shang, J. M. Chen, G. Zhao, X. Zhang, Y. Huang, G. Yu, N. He, L. Xu, and W. Jiao. High-resolution forest age  
456 mapping based on forest height maps derived from GEDI and ICESat-2 space-borne lidar data. *Agric For Meteorol.*,  
457 339:109592, <https://doi.org/10.1016/j.agrformet.2023.109592>, 2023.
- 458 Liu, X., Y. Su, T. Hu, Q. Yang, B. Liu, Y. Deng, H. Tang, Z. Tang, J. Fang, and Q. Guo. Neural network guided interpolation  
459 for mapping canopy height of China's forests by integrating GEDI and ICESat-2 data. *Remote Sens Environ.*, 269,  
460 <https://doi.org/10.1016/j.rse.2021.112844>, 2022.
- 461 Lundberg, S. and Lee, S.-I. A Unified Approach to Interpreting Model Predictions, arXiv [preprint], arXiv:1705.07874,  
462 <https://doi.org/10.48550/arXiv.1705.07874>, 2017.
- 463 Lundberg, S. M., Erion, G. G., and Lee, S.-I. Consistent Individualized Feature Attribution for Tree Ensembles, arXiv  
464 [preprint], arXiv:1802.03888, <https://doi.org/10.48550/arXiv.1802.03888>, 2019
- 465 Luther, J. E., R. A. Fournier, O. R. van Lier, and M. Bujold. Extending ALS-Based Mapping of Forest Attributes with Medium  
466 Resolution Satellite and Environmental Data. *Remote Sens.*, 11:1092, <https://doi.org/10.3390/rs11091092>, 2019.
- 467 Maltamo, M., H. Kinnunen, A. Kangas, and L. Korhonen. Predicting stand age in managed forests using National Forest  
468 Inventory field data and airborne laser scanning. *For. Ecosyst.*, 7:44, <https://doi.org/10.1186/s40663-020-00254-z>, 2020.
- 469 Maltman, J. C., T. Hermosilla, M. A. Wulder, N. C. Coops, and J. C. White. Estimating and mapping forest age across Canada's  
470 forested ecosystems. *Remote Sens Environ.*, 290:113529, <https://doi.org/10.1016/j.rse.2023.113529>, 2023a.
- 471 Matasci, G., T. Hermosilla, M. A. Wulder, J. C. White, N. C. Coops, G. W. Hobart, and H. S. J. Zald. Large-area mapping of  
472 Canadian boreal forest cover, height, biomass and other structural attributes using Landsat composites and lidar plots.  
473 *Remote Sens Environ.*, 209:90-106, <https://doi.org/10.1016/j.rse.2017.12.020>, 2018.
- 474 Matloob, F., T. M. Ghazal, N. Taleb, S. Aftab, M. Ahmad, M. A. Khan, S. Abbas, and T. R. Soomro. Software Defect  
475 Prediction Using Ensemble Learning: A Systematic Literature Review. *IEEE Access*, 9:98754-98771,  
476 <https://doi.org/10.1109/ACCESS.2021.3095559>, 2021.
- 477 Mekruksavanich, S., P. Jantawong, N. Hnoohom, and A. Jitpattanakul. Hyperparameter Tuning in Convolutional Neural  
478 Network for Face Touching Activity Recognition using Accelerometer Data. Pages 101-105 in 2022 Research, Invention,



- 479 and Innovation Congress: Innovative Electricals and Electronics (RI2C). <https://doi.org/10.1109/RI2C56397.2022.9910262>,  
480 2022.
- 481 Montesano, P. M., B. D. Cook, G. Sun, M. Simard, R. F. Nelson, K. J. Ranson, Z. Zhang, and S. Luthcke. Achieving accuracy  
482 requirements for forest biomass mapping: A spaceborne data fusion method for estimating forest biomass and LiDAR  
483 sampling error. *Remote Sens Environ.*, 130:153-170, <https://doi.org/10.1016/j.rse.2012.11.016>, 2013.
- 484 Niu, Y., V. Squires, and A. Jentsch. Risks of China's increased forest area. *Science*, 379:447-448,  
485 <https://doi.org/10.1126/science.adg0210>, 2023.
- 486 Pan, Y., R. A. Birdsey, J. Fang, R. Houghton, P. E. Kauppi, W. A. Kurz, O. L. Phillips, A. Shvidenko, S. L. Lewis, J. G.  
487 Canadell, P. Ciais, R. B. Jackson, S. W. Pacala, A. D. McGuire, S. Piao, A. Rautiainen, S. Sitch, and D. Hayes. A Large and  
488 Persistent Carbon Sink in the World. *Forests. Science*, 333:988-993, <https://doi.org/10.1126/science.1201609>, 2011.
- 489 Piao, S., Y. He, X. Wang, and F. Chen. Estimation of China's terrestrial ecosystem carbon sink: Methods, progress and  
490 prospects. *Sci. China Earth Sci.*, 65:641 – 651, <https://doi.org/10.1007/s11430-021-9892-6>, 2022.
- 491 Ren, Y., Wei, X., Zhang, L., Cui, S., Chen, F., Xiong, Y., & Xie, P. Potential for forest vegetation carbon storage in Fujian  
492 Province, China, determined from forest inventories. *Plant Soil.*, 345, 125-140, <https://doi.org/10.1007/s11104-011-0766-2>,  
493 2011.
- 494 Rodriguez, J. J., L. I. Kuncheva, and C. J. Alonso. Rotation Forest: A New Classifier Ensemble Method. *IEEE Trans. Pattern*  
495 *Anal. Mach. Intell.*, 28:1619-1630, <https://doi.org/10.1109/TPAMI.2006.211>, 2006.
- 496 Rokach, L. Taxonomy for characterizing ensemble methods in classification tasks: A review and annotated bibliography.  
497 *Computational Statistics & Data Analysis*, 53:4046-4072, <https://doi.org/10.1016/j.csda.2009.07.017>, 2009.
- 498 Sandha, S. S., M. Aggarwal, I. Fedorov, and M. Srivastava. Mango: A Python Library for Parallel Hyperparameter Tuning.  
499 Pages 3987-3991 in *ICASSP 2020 - 2020 IEEE International Conference on Acoustics, Speech and Signal Processing*  
500 *(ICASSP)*, <https://doi.org/10.1109/ICASSP40776.2020.9054609>, 2020.
- 501 Schumacher, J., M. Hauglin, R. Astrup, and J. Breidenbach. Mapping forest age using National Forest Inventory, airborne  
502 laser scanning, and Sentinel-2 data. *For. Ecosyst.*, 7:60, <https://doi.org/10.1186/s40663-020-00274-9>, 2020a.
- 503 Sharma, M., and J. Parton. Height–diameter equations for boreal tree species in Ontario using a mixed-effects modelling  
504 approach. *For. Ecol. Manag.*, 249:187-198, <https://doi.org/10.1016/j.foreco.2007.05.006>, 2007.
- 505 Simard, M., N. Pinto, J. B. Fisher, and A. Baccini. Mapping forest canopy height globally with spaceborne lidar. *J. Geophys.*  
506 *Res. Biogeosci.*, 116, <https://doi.org/10.1029/2011JG001708>, 2011.
- 507 Su, Y., Q. Guo, T. Hu, H. Guan, S. Jin, S. An, X. Chen, K. Guo, Z. Hao, Y. Hu, Y. Huang, M. Jiang, J. Li, Z. Li, X. Li, X. Li,  
508 C. Liang, R. Liu, Q. Liu, H. Ni, S. Peng, Z. Shen, Z. Tang, X. Tian, X. Wang, R. Wang, Z. Xie, Y. Xie, X. Xu, X. Yang, Y.  
509 Yang, L. Yu, M. Yue, F. Zhang, and K. Ma. An updated Vegetation Map of China (1:1000000). *Sci. Bull.*, 65:1125-1136,  
510 <https://doi.org/10.1016/j.scib.2020.04.004>, 2020.





- 511 Sun, Bochao, Wenjun Cui, Gaoyang Liu, Biao Zhou, and Weijian Zhao. A hybrid strategy of AutoML and SHAP for automated  
512 and explainable concrete strength prediction. *Case Stud. Constr. Mater.*, 19: e02405,  
513 <https://doi.org/10.1016/j.cscm.2023.e02405>, 2023.
- 514 Tesfagergish, S. G., J. Kapočiūtė-Dzikienė, and R. Damaševičius. Zero-Shot Emotion Detection for Semi-Supervised  
515 Sentiment Analysis Using Sentence Transformers and Ensemble Learning. *Appl. Sci.*, 12(17), 8662,  
516 <https://doi.org/10.3390/app12178662>, 2022.
- 517 Tian, L., L. Liao, Y. Tao, X. Wu, and M. Li. Forest Age Mapping Using Landsat Time-Series Stacks Data Based on Forest  
518 Disturbance and Empirical Relationships between Age and Height. *Remote Sens.*, 15:2862,  
519 <https://doi.org/10.3390/rs15112862>, 2023.
- 520 Tong, X., M. Brandt, Y. Yue, P. Ciais, M. Rudbeck Jepsen, J. Penuelas, J.-P. Wigneron, X. Xiao, X.-P. Song, S. Horion, K.  
521 Rasmussen, S. Saatchi, L. Fan, K. Wang, B. Zhang, Z. Chen, Y. Wang, X. Li, and R. Fensholt. Forest management in  
522 southern China generates short term extensive carbon sequestration. *Nat. Commun.*, 11, <https://doi.org/10.1038/s41467-019-13798-8>, 2020.
- 524 Tubiello, F. N., G. Conchedda, L. Casse, P. Hao, G. De Santis, and Z. Chen. A new cropland area database by country circa  
525 2020. *Earth Syst. Sci. Data Discuss.*, 2023:1-33, <https://doi.org/10.5194/essd-2023-211>, 2023.
- 526 Wang, S., J. M. Chen, W. M. Ju, X. Feng, M. Chen, P. Chen, and G. Yu. Carbon sinks and sources in China's forests during  
527 1901–2001. *J. Environ. Manage.*, 85:524-537, <https://doi.org/10.1016/j.jenvman.2006.09.019>, 2007.
- 528 Wang, Y., X. Wang, K. Wang, F. Chevallier, D. Zhu, J. Lian, Y. He, H. Tian, J. Li, J. Zhu, S. Jeong, and J. G. Canadell. The  
529 size of the land carbon sink in China. *Nature*, 603:E7-E9, <https://doi.org/10.1038/s41586-021-04255-y>, 2022.
- 530 Wei, Z., Y. Meng, W. Zhang, J. Peng, and L. Meng. Downscaling SMAP soil moisture estimation with gradient boosting  
531 decision tree regression over the Tibetan Plateau. *Remote Sens Environ.*, 225:30-44,  
532 <https://doi.org/10.1016/j.rse.2019.02.022>, 2019.
- 533 Xia, J., X. Xia, Y. Chen, R. Shen, Z. Zhang, B. Liang, J. Wang, and W. Yuan. Reconstructing Long-Term Forest Age of China  
534 by Combining Forest Inventories, Satellite-Based Forest Age and Forest Cover Data Sets. *J. Geophys. Res. Biogeosci.*, 128:  
535 e2023JG007492, <https://doi.org/10.1029/2023JG007492>, 2023.
- 536 Xiao, Y., Q. Wang, X. Tong, and P. M. Atkinson. Thirty-meter map of young forest age in China. *Earth Syst. Sci. Data.*,  
537 15:3365-3386, <https://doi.org/10.5194/essd-15-3365-2023>, 2023.
- 538 Yu, Z., H. R. Zhao, S. R. Liu, G. Y. Zhou, J. Y. Fang, G. R. Yu, X. L. Tang, W. T. Wang, J. H. Yan, G. X. Wang, K. P. Ma,  
539 S. G. Li, S. Du, S. J. Han, Y. X. Ma, D. Q. Zhang, J. X. Liu, S. Z. Liu, G. W. Chu, Q. M. Zhang, and Y. L. Li. Mapping  
540 forest type and age in China's plantations. *Sci. Total Environ.*, 744. <https://doi.org/10.1016/j.scitotenv.2020.140790>, 2020b.
- 541 Zhang H, J. Y, , Shen X, Li G, and Z. D. Rising Air Temperature and Its Asymmetry Under Different Vegetation Regions in  
542 China. *Sci. Geol. Sin.*, 38 (2): 272-283, <https://doi.org/10.13249/j.cnki.sgs.2018.02.014>, 2018.

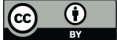

- 543 Zhang, C., W. Ju, J. M. Chen, D. Li, X. Wang, W. Fan, M. Li, and M. Zan. Mapping forest stand age in China using remotely  
544 sensed forest height and observation data. *J. Geophys. Res. Biogeosci.*, 119:1163-1179,  
545 <https://doi.org/10.1002/2013JG002515>, 2014.
- 546 Zhang, Y., Y. Yao, X. Wang, Y. Liu, and S. Piao. Mapping spatial distribution of forest age in China. *Earth Space Sci.*, 4:108-  
547 116, <https://doi.org/10.1002/2016EA000177>, 2017.
- 548 Zhang, Z., F. Zhang, L. Wang, A. Lin, and L. Zhao. Biophysical climate impact of forests with different age classes in mid-  
549 and high-latitude North America. *For. Ecol. Manag.*, 494:119327. <https://doi.org/10.1016/j.foreco.2021.119327>, 2021.
- 550
